# Supplementary material for: SiP-heterocycles derived from a bulky phosphanylsilylene
Source: Royal Society of Chemistry journal article supplement (doi:10.1039/d3cc02512h), 2023-01-01
Supplement: d3cc02512h1.pdf [file d3cc02512h1.pdf]

*Supporting Information*

## **SiP-heterocycles derived from a bulky phosphanylsilylene**

Chenfeng Wang,<sup>‡a</sup> Ming-Der Su,<sup>‡cd</sup> Zijie Fang,<sup>a</sup> Jiahao Zhou,<sup>a</sup> Haoqi Zhang,<sup>a</sup> Xiaodi Li,<sup>a</sup> Darui Zuo,<sup>a</sup> Zheng-Feng Zhang,<sup>c</sup> and Yan Li<sup>\*ab</sup>

<sup>a</sup> *College of Material, Chemistry and Chemical Engineering, Key Laboratory of Organosilicon Chemistry and Material Technology, Ministry of Education, Hangzhou Normal University, Hangzhou, 311121, China.*

<sup>b</sup> *Key Laboratory of Silicone Materials Technology of Zhejiang Province, Hangzhou Normal University, Hangzhou 311121, PR China.*

<sup>c</sup> *Department of Applied Chemistry, National Chiayi University, Chiayi, 60004, Taiwan.*

<sup>d</sup> *Department of Medicinal and Applied Chemistry, Kaohsiung Medical University, Kaohsiung 80708, Taiwan.*

Corresponding Author: E-mail: yli@hznu.edu.cn

<sup>‡</sup>C. Wang and M.-D. Su have equal contribution to this work.

### **Content:**

**I. Experimental sections**

**II. UV-visible, PL emission and IR spectra of 3a-d**

**III. X-Ray crystallographic details**

**IV. Theoretical calculations**

**V. Collected <sup>1</sup>H, <sup>13</sup>C, <sup>29</sup>Si, <sup>31</sup>P and <sup>19</sup>F NMR spectra of compounds 1, 2, 3a-d and 4**

**VI. References**

## I. Experimental sections

All key manipulations were carried out under dry argon or nitrogen atmosphere by using Schlenk line and glovebox techniques. Toluene, THF and hexane were dried by refluxing with sodium/potassium benzophenone under N<sub>2</sub>. LSiCl was synthesized according to the literature<sup>S1</sup>. <sup>1</sup>H, <sup>13</sup>C{<sup>1</sup>H}, <sup>31</sup>P{<sup>1</sup>H}, <sup>29</sup>Si{<sup>1</sup>H} and <sup>19</sup>F{<sup>1</sup>H} NMR spectra were recorded on a Bruker Avance II 400 or 500 spectrometer. Elemental analysis was performed on a Thermo Quest Italia SPA EA 1110 instrument. Commercial reagents were purchased from TCI and Sigma-Aldrich and were used directly. UV–visible spectra were taken on a Cary 4000 (Agilent Technologies) UV–visible spectrophotometer. The PL spectra were recorded using an Edinburgh Instruments FLS920 spectrophotometer.

**1:** At 0 °C, *t*BuLi (3.9 mL, 5.1 mmol, 1.3 M in hexane) was added dropwise to a toluene solution (120 mL) of Ad<sub>2</sub>PH (1.5 g, 5.0 mmol). The reaction was allowed to warm to room temperature and stirred for 3 hours. Then, the resulted suspension was slowly transferred to a toluene solution (10 mL) of LSiCl (1.5 g, 5.0 mmol) via syringe at room temperature. The reaction mixture was stirred overnight followed by being filtered to obtain a yellow filtrate. The filtrate was dried under vacuum and the residue was washed by hexane (2×10 mL) to obtain compound **1** as grey-yellow powder. Yield: 2.0 g, 70%. X-ray quality single crystals of **1** were grown in its toluene solution at 0 °C. m.p.: 195 °C (dec.). Elemental analysis calcd (%) for C<sub>35</sub>H<sub>53</sub>N<sub>2</sub>PSi (560.85): C, 74.95; H, 9.53; N, 4.99. Anal. found: C, 74.77; H, 9.29; N, 5.09. <sup>1</sup>H NMR (400 MHz, C<sub>6</sub>D<sub>6</sub>, 298 K, ppm): δ 7.26 (m, 1H, PhH), 7.07-6.95 (m, 4H, PhH), 2.65-2.45 (m, 12H, AdH), 2.04-1.74 (m, 18H, AdH), 1.35 (s, 18H, NCM<sub>3</sub>). <sup>13</sup>C{<sup>1</sup>H} NMR (100 MHz, C<sub>6</sub>D<sub>6</sub>, 298 K, ppm): δ 155.3 (NCN), 134.9, 130.0, 129.1, 127.2 (PhC), 53.9 (NCMe<sub>3</sub>), 45.5, 44.0, 37.2, 31.8, 29.7 (AdC + NCM<sub>3</sub>). <sup>29</sup>Si{<sup>1</sup>H} NMR (95 MHz, C<sub>6</sub>D<sub>6</sub>, 298 K, ppm): δ 46.6 (d, <sup>1</sup>J<sub>P,Si</sub> = 199.0 Hz). <sup>31</sup>P{<sup>1</sup>H} NMR (163 MHz, C<sub>6</sub>D<sub>6</sub>, 298 K, ppm): 28.7.

**2:** To a mixture of **1** (0.17 g, 0.30 mmol) and PhC≡CPh (0.054 g, 0.30 mmol) was added toluene (30 mL) at room temperature and the suspension was stirred for 4 h. Then, the resulted suspension was filtered and the filtrate was dried under vacuum to obtain **2** as light-yellow powder in quantitative yield. X-ray quality single crystals of **2** were grown in its toluene solution at 0 °C. m.p.: 190 °C (dec.). Elemental analysis calcd (%) for C<sub>49</sub>H<sub>63</sub>N<sub>2</sub>PSi (739.07): C, 79.63; H, 8.59; N, 3.79. Anal. found: C, 79.51; H, 8.33; N, 3.87. <sup>1</sup>H NMR (400 MHz, C<sub>6</sub>D<sub>6</sub>, 298 K, ppm): δ 7.79 (m, 3H, PhH), 7.38-7.04 (m, 12H, PhH), 2.71

(m, 12H, AdH), 1.95-1.82 (m, 18H, AdH), 1.39 (s, 18H, NCM<sub>e</sub><sub>3</sub>). <sup>13</sup>C{<sup>1</sup>H} NMR (100 MHz, C<sub>6</sub>D<sub>6</sub>, 298 K, ppm): δ 171.7 (NCN), 139.4, 137.5, 134.8, 131.6, 129.0, 128.3, 128.1, 125.9, 125.3 (PhC + C≡C), 53.9 (NCMe<sub>3</sub>), 43.6, 43.8, 37.2, 31.7, 29.6 (AdC + NCM<sub>e</sub><sub>3</sub>). <sup>29</sup>Si{<sup>1</sup>H} NMR (95 MHz, C<sub>6</sub>D<sub>6</sub>, 298 K, ppm): δ -141.4 (d, <sup>1</sup>J<sub>P,Si</sub> = 60.6 Hz). <sup>31</sup>P{<sup>1</sup>H} NMR (163 MHz, C<sub>6</sub>D<sub>6</sub>, 298 K, ppm): 14.9.

**3a:** In a sealed thick-walled vessel, **2** (0.22 g, 0.30 mmol) was stirred in toluene (30 mL) at 80 °C under microwave (560 W) for 20 min. After workup, the vessel was transferred in the glovebox, where the resulted dark-red solution was filtered and the filtrate was concentrated to 3 mL. Orange crystals of **3** were obtained at room temperature after two days. Yield: 0.16 g, 72%. m.p.: 190 °C (dec.). Elemental analysis calcd (%) for C<sub>49</sub>H<sub>63</sub>N<sub>2</sub>PSi (739.07): C, 79.63; H, 8.59; N, 3.79. Anal. found: C, 79.34; H, 8.39; N, 3.52. <sup>1</sup>H NMR (400 MHz, C<sub>6</sub>D<sub>6</sub>, 298 K, ppm): δ 7.42 (d, 1H, PhH), 7.15-6.77 (m, 9H, PhH), 6.11 (m, 1H, CH=C), 5.87 (m, 1H, CH=C), 5.81 (d, 1H, C=C-CH=C), 5.37 (m, 1H, CH=C), 4.84 (m, 1H, C=C-CH), 3.15-1.68 (m, 30H, AdH + NH), 1.56 (s, 9H, NCM<sub>e</sub><sub>3</sub>), 1.46 (s, 9H, NCM<sub>e</sub><sub>3</sub>). <sup>13</sup>C{<sup>1</sup>H} NMR (100 MHz, C<sub>6</sub>D<sub>6</sub>, 298 K, ppm): δ 154.0, 145.2, 142.6, 140.1, 138.2, 133.5, 131.8, 131.7, 131.3, 129.7, 127.1, 126.9, 126.7, 125.7, 124.7, 121.7 (PhC + C=C + C=C-CH), 55.0, 52.7, 51.2, 47.9, 45.5, 44.2, 41.6, 41.5, 41.4, 40.2, 40.0, 39.5, 37.3, 37.0, 34.0, 33.4, 32.6, 32.2, 29.9, 29.8, 29.7, 29.1, 28.0 (AdC + NCM<sub>e</sub><sub>3</sub> + NCM<sub>e</sub><sub>3</sub>). <sup>29</sup>Si{<sup>1</sup>H} NMR (95 MHz, C<sub>6</sub>D<sub>6</sub>, 298 K, ppm): δ -19.2 (d, <sup>1</sup>J<sub>P,Si</sub> = 19.8 Hz). <sup>31</sup>P{<sup>1</sup>H} NMR (163 MHz, C<sub>6</sub>D<sub>6</sub>, 298 K, ppm): -20.2. IR (Nujol mull, cm<sup>-1</sup>):  $\tilde{\nu}$  3381 (N-H). UV-visible absorption band at 465 nm (in toluene). PL emission band at 580 nm (in toluene).

**3b:** In a sealed thick-walled vessel, **1** (0.17 g, 0.30 mmol) and PhC≡CH (0.031 g, 0.30 mmol) was stirred in toluene (30 mL) at 80 °C under microwave (560 W) for 20 min. After workup, the vessel was transferred in the glovebox, where the resulted dark-red solution was filtered and the filtrate was concentrated to 3 mL to obtain orange crystals of **3b**. Yield: 0.15 g, 75%. m.p.: 185 °C (dec.). Elemental analysis calcd (%) for C<sub>43</sub>H<sub>59</sub>N<sub>2</sub>PSi (663.02): C, 77.90; H, 8.97; N, 4.23. Anal. found: C, 77.79; H, 8.88; N, 4.18. <sup>1</sup>H NMR (400 MHz, C<sub>6</sub>D<sub>6</sub>, 298 K, ppm): δ 7.41 (d, 1H, PhH), 7.21 (m, 2H, PhH), 7.06-7.00 (m, 2H, PhH), 6.45 (s, 1H, PhC=CH), 6.17 (m, 1H, CH=C), 6.10 (d, 1H, C=C-CH=C), 5.96 (m, 1H, CH=C), 5.54 (m, 1H, CH=C), 4.75 (m, 1H, C=C-CH), 3.14-1.57 (m, 30H, AdH + NH), 1.39 (s, 9H, NCM<sub>e</sub><sub>3</sub>), 1.31 (s, 9H, NCM<sub>e</sub><sub>3</sub>). <sup>13</sup>C{<sup>1</sup>H} NMR (100 MHz, C<sub>6</sub>D<sub>6</sub>, 298 K, ppm): δ 144.4, 143.2, 142.7, 141.1, 130.4, 130.0, 128.8, 128.2, 125.7, 125.3, 124.9, 121.6, 119.6 (PhC + C=C + C=C-CH), 52.9, 52.4, 51.5, 47.8, 45.5, 44.2, 41.9, 41.2, 40.0, 39.8, 37.4, 37.2,

36.9, 33.8, 32.6, 32.2, 31.6, 30.3, 29.6, 28.9, 28.0 (AdC + NCMe<sub>3</sub> + NCMe<sub>3</sub>). <sup>29</sup>Si{<sup>1</sup>H} NMR (95 MHz, C<sub>6</sub>D<sub>6</sub>, 298 K, ppm): δ -19.7 (d, <sup>1</sup>J<sub>P,Si</sub> = 17.9 Hz). <sup>31</sup>P{<sup>1</sup>H} NMR (163 MHz, C<sub>6</sub>D<sub>6</sub>, 298 K, ppm): -24.8. IR (Nujol mull, cm<sup>-1</sup>):  $\tilde{\nu}$  3385 (N–H). UV-visible absorption bands at 463 nm (in toluene). PL emission bands at 609 nm (in toluene).

**3c:** The synthetic procedure is similar to that of **3b**, where ArC≡CH (Ar = 4-*i*Pr-C<sub>6</sub>H<sub>4</sub>; 0.043 g, 0.30 mmol) was employed and orange crystals of **3c** were obtained. Yield: 0.16 g, 78%. m.p.: 205 °C (dec.). Elemental analysis calcd (%) for C<sub>46</sub>H<sub>65</sub>N<sub>2</sub>PSi (705.06): C, 78.36; H, 9.29; N, 3.97. Anal. found: C, 78.27; H, 9.36; N, 3.89. <sup>1</sup>H NMR (400 MHz, C<sub>6</sub>D<sub>6</sub>, 298 K, ppm): δ 7.42 (d, 2H, PhH), 7.11 (m, 2H, PhH), 6.43 (s, 1H, 4-*i*Pr-PhC=CH), 6.15 (m, 2H, C=C-CH=C + CH=C), 5.95 (m, 1H, CH=C), 5.55 (m, 1H, CH=C), 4.74 (m, 1H, C=C-CH), 3.11 (m, 1H, AdH), 2.84 (m, 1H, AdH), 2.72 (m, 2H, CHMe<sub>2</sub> + AdH), 2.42-1.63 (m, 30H, AdH + NH), 1.37 (s, 9H, NCMe<sub>3</sub>), 1.30 (s, 9H, NCMe<sub>3</sub>), 1.15 (m, 6H, CHMe<sub>2</sub>). <sup>13</sup>C{<sup>1</sup>H} NMR (100 MHz, C<sub>6</sub>D<sub>6</sub>, 298 K, ppm): δ 145.3, 144.6, 143.1, 141.0, 140.2, 130.3, 128.9, 125.9, 125.8, 121.5, 119.6 (PhC + C=C + C=C-CH), 52.9, 52.4, 51.4, 47.8, 45.5, 44.2, 41.6, 41.9, 41.3, 40.9, 39.4, 37.2, 36.9, 33.8, 32.6, 32.2, 30.4, 29.5, 28.0 (AdC + CHMe<sub>2</sub> + NCMe<sub>3</sub> + NCMe<sub>3</sub>), 24.1, 23.9 (CHMe<sub>2</sub>). <sup>29</sup>Si{<sup>1</sup>H} NMR (95 MHz, C<sub>6</sub>D<sub>6</sub>, 298 K, ppm): δ -19.7 (d, <sup>1</sup>J<sub>P,Si</sub> = 18.0 Hz). <sup>31</sup>P{<sup>1</sup>H} NMR (163 MHz, C<sub>6</sub>D<sub>6</sub>, 298 K, ppm): -24.9. IR (Nujol mull, cm<sup>-1</sup>):  $\tilde{\nu}$  3373 (N–H). UV-visible absorption bands at 474 nm (in toluene). PL emission band at 596 nm (in toluene).

**3d:** The synthetic procedure is similar to that of **3b**, where ArC≡CH (Ar = 3-F-C<sub>6</sub>H<sub>4</sub>; 0.036 g, 0.30 mmol) was employed and orange crystals of **3d** were obtained. Yield: 0.15 g, 71%. m.p.: 200 °C (dec.). Elemental analysis calcd (%) for C<sub>43</sub>H<sub>58</sub>FN<sub>2</sub>PSi (680.97): C, 75.84; H, 8.58; N, 4.11. Anal. found: C, 75.92; H, 8.65; N, 4.19. <sup>1</sup>H NMR (400 MHz, C<sub>6</sub>D<sub>6</sub>, 298 K, ppm): δ 7.21-6.95 (m, 3H, PhH), 6.75 (m, 1H, PhH), 6.45 (s, 1H, 3-F-PhC=CH), 6.15 (m, 1H, CH=C), 6.02 (d, 1H, C=C-CH=C), 5.92 (m, 1H, CH=C), 5.58 (m, 1H, CH=C), 4.70 (m, 1H, C=C-CH), 3.12-1.66 (m, 30H, AdH + NH), 1.34 (s, 9H, NCMe<sub>3</sub>), 1.29 (s, 9H, NCMe<sub>3</sub>). <sup>13</sup>C{<sup>1</sup>H} NMR (100 MHz, C<sub>6</sub>D<sub>6</sub>, 298 K, ppm): δ 164.1, 162.1, 145.3, 143.8, 143.6, 141.5, 130.6, 129.2, 129.0, 128.6, 128.2, 125.8, 122.1, 114.6, 111.5 (PhC + C=C + C=C-CH), 53.1, 42.4, 51.5, 47.9, 47.7, 45.3, 45.2, 44.3, 41.9, 41.3, 40.0, 39.3, 37.1, 36.8, 33.7, 32.5, 32.2, 30.3, 29.5, 29.0, 27.9 (AdC + NCMe<sub>3</sub> + NCMe<sub>3</sub>). <sup>29</sup>Si{<sup>1</sup>H} NMR (95 MHz, C<sub>6</sub>D<sub>6</sub>, 298 K, ppm): δ -19.6 (d, <sup>1</sup>J<sub>P,Si</sub> = 19.0 Hz). <sup>19</sup>F{<sup>1</sup>H} NMR (376 MHz, C<sub>6</sub>D<sub>6</sub>, 298 K, ppm): -113.9. <sup>31</sup>P{<sup>1</sup>H} NMR (163 MHz, C<sub>6</sub>D<sub>6</sub>, 298 K, ppm): -25.1. IR (Nujol mull, cm<sup>-1</sup>):  $\tilde{\nu}$  3381 (N–H). UV-visible absorption bands at 467 nm (in toluene). PL emission band at 593 nm (in toluene).

**4**: To a mixture of **1** (0.17 g, 0.30 mmol) and AdC≡P (0.11 g, 0.60 mmol) was added toluene (20 mL) at room temperature and the reaction was stirred for 8 hours. The resulted orange suspension was filtered and the filtrate was concentrated under vacuum to 2 mL. Red crystals of **4** were grown at room temperature. Yield: 0.16 g, 52%. m.p.: 225 °C (dec.). Elemental analysis calcd (%) for C<sub>64</sub>H<sub>91</sub>N<sub>2</sub>P<sub>3</sub>Si (1009.38): C, 76.15; H, 9.09; N, 2.78. Anal. found: C, 76.28; H, 9.18; N, 2.87. <sup>1</sup>H NMR (400 MHz, C<sub>6</sub>D<sub>6</sub>, 298 K, ppm): δ 7.25 (m, 1H, PhH), 7.08-6.82 (m, 4H, PhH), 2.68-1.63 (m, 29H, AdH), 1.49-1.16 (m, 39H, NCM<sub>3</sub> + AdH), 0.91 (m, 10H, AdH). <sup>13</sup>C{<sup>1</sup>H} NMR (100 MHz, C<sub>6</sub>D<sub>6</sub>, 298 K, ppm): δ 174.8 (NCN), 140.6, 137.5, 129.0, 125.3, (PhC), 67.5 (C=Si), 65.6 (C=P), 59.7, 54.6, 43.5, 42.4, 38.2, 37.5, 37.2, 36.7, 32.9, 32.0, 31.3, 31.2, 30.4, 30.2, 29.9, 29.6, 29.5, 28.9, 28.8, 22.8, 22.7, 21.1 (AdC + NCM<sub>3</sub> + NCM<sub>3</sub>). <sup>29</sup>Si{<sup>1</sup>H} NMR (95 MHz, C<sub>6</sub>D<sub>6</sub>, 298 K, ppm): δ 29.5 (m). <sup>31</sup>P{<sup>1</sup>H} NMR (163 MHz, C<sub>6</sub>D<sub>6</sub>, 298 K, ppm): δ 343.2 (br, P=C), 29.3 (d, <sup>1</sup>J<sub>P,P</sub> = 378.1 Hz, PAd<sub>2</sub>), -143.5 (dd, <sup>1</sup>J<sub>P,P</sub> = 378.1 Hz, <sup>2</sup>J<sub>P,P</sub> = 7.0 Hz, SiP).

## II. UV-visible, PL emission and IR spectra of 3a-d

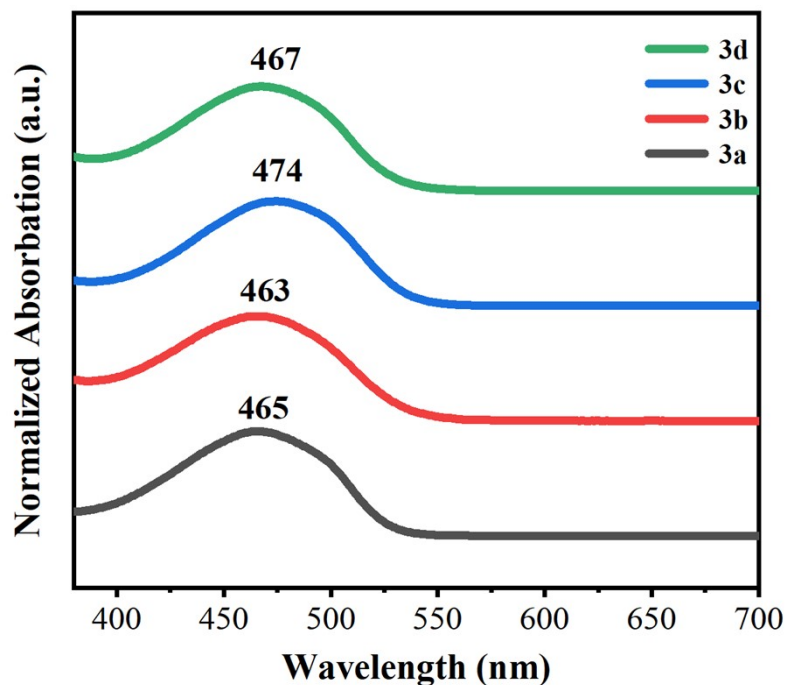

Fig. S1 UV-visible spectra of compounds **3a-d** measured in toluene

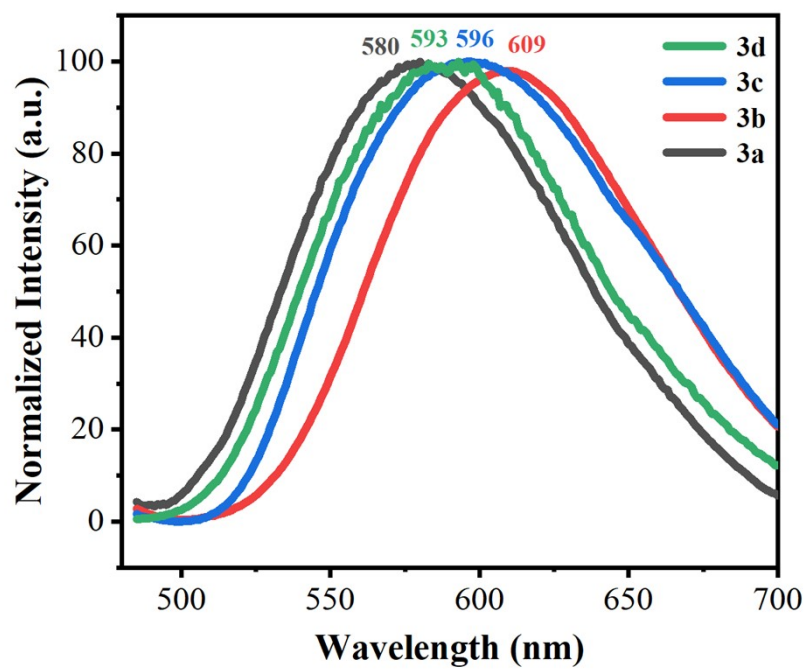

**Fig. S2** PL emission spectra of compounds **3a-d** measured in toluene (excitation wavelength: 455 nm)

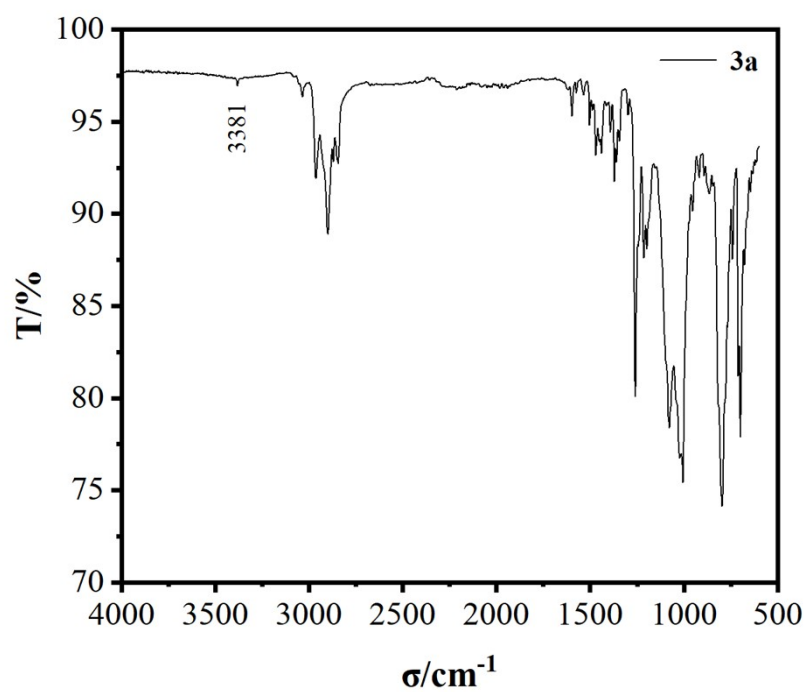

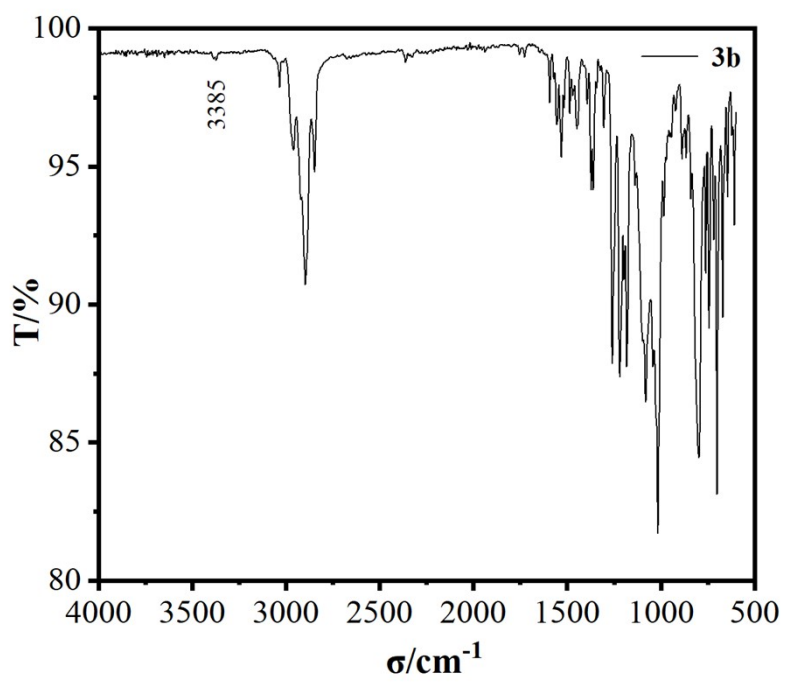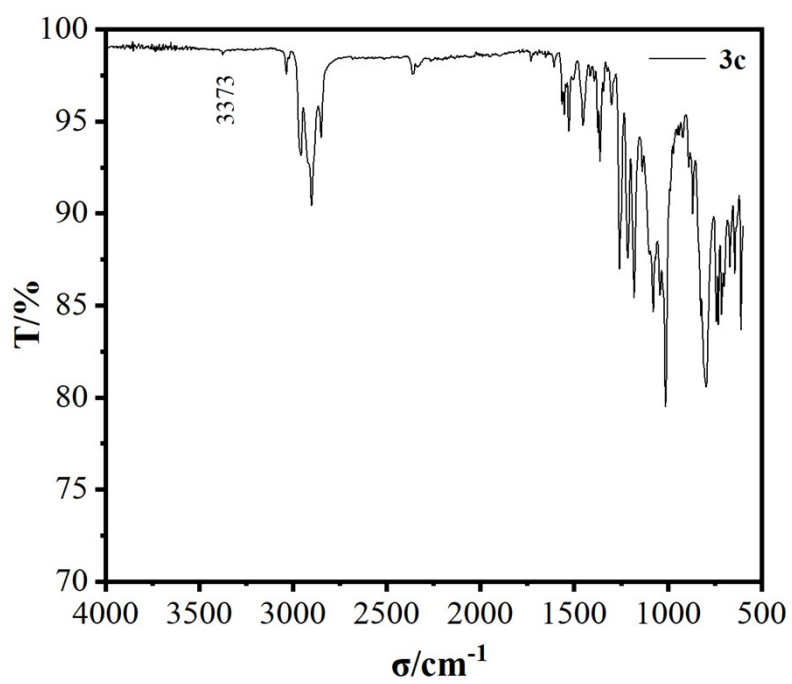

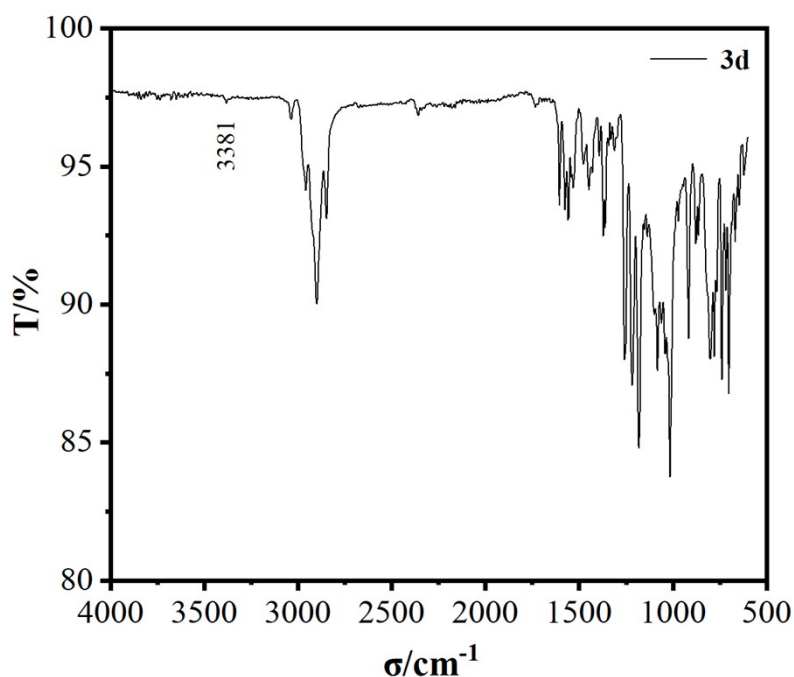

Fig. S3 IR spectra of compounds **3a-d**

### III. X-Ray crystallographic details

Crystallographic data were collected on a Smart ApexIIDUO system. During measurements a graphite-monochromatic Mo-K $\alpha$  radiation ( $\lambda = 0.71073 \text{ \AA}$ ) was applied. Absorption corrections were all employed using the spherical harmonics program (multi-scan type). All the structures were solved by direct methods (SHELXT)<sup>S2</sup> and refined against  $F^2$  using SHELXL.<sup>S3</sup> In general, the non-hydrogen atoms were located by difference Fourier synthesis and refined anisotropically, and hydrogen atoms were included using a riding mode with  $U_{\text{iso}}$  tied to the  $U_{\text{iso}}$  of the parent atoms unless otherwise specified. A summary of cell parameters, data collection, and structure solution and refinements is given in Table S1.

Table S1 Crystal data and refinements

|                   | <b>1</b>                                           | <b>2</b>                                           | <b>3a(S)</b>                                       | <b>3a(R)</b>                                       |
|-------------------|----------------------------------------------------|----------------------------------------------------|----------------------------------------------------|----------------------------------------------------|
| CCDC No.          | 2204068                                            | 2204070                                            | 2277645                                            | 2223430                                            |
| Empirical formula | C <sub>35</sub> H <sub>53</sub> N <sub>2</sub> PSi | C <sub>56</sub> H <sub>71</sub> N <sub>2</sub> PSi | C <sub>49</sub> H <sub>63</sub> N <sub>2</sub> PSi | C <sub>49</sub> H <sub>63</sub> N <sub>2</sub> PSi |
| formula weight    | 560.85                                             | 831.20                                             | 739.07                                             | 739.07                                             |
| crystal system    | Monoclinic                                         | Monoclinic                                         | monoclinic                                         | orthorhombic                                       |
| space group       | $P2_1/c$                                           | $P2_1$                                             | $P2_1$                                             | $P2_12_12_1$                                       |
| $a/\text{\AA}$    | 20.8037(13)                                        | 11.6045(3)                                         | 16.6726(8)                                         | 13.281(3)                                          |



|                                                     |                                                                   |                                                                   |                                                                   |                                                                   |
|-----------------------------------------------------|-------------------------------------------------------------------|-------------------------------------------------------------------|-------------------------------------------------------------------|-------------------------------------------------------------------|
| <i>b</i> /Å                                         | 8.7396(5)                                                         | 18.8105(6)                                                        | 13.2923(6)                                                        | 16.693(3)                                                         |
| <i>c</i> /Å                                         | 18.1837(10)                                                       | 11.9676(3)                                                        | 18.7216(9)                                                        | 18.753(4)                                                         |
| <i>α</i> /deg                                       | 90                                                                | 90                                                                | 90                                                                | 90                                                                |
| <i>β</i> /deg                                       | 100.716(2)                                                        | 115.1440(10)                                                      | 90.063(2)                                                         | 90                                                                |
| <i>γ</i> /deg                                       | 90                                                                | 90                                                                | 90                                                                | 90                                                                |
| <i>V</i> /Å <sup>3</sup>                            | 3248.4(3)                                                         | 2364.82(12)                                                       | 4149.0(3)                                                         | 4157.4(14)                                                        |
| <i>Z</i>                                            | 4                                                                 | 2                                                                 | 4                                                                 | 4                                                                 |
| $\rho_{\text{calcd}}$ /g·cm <sup>-3</sup>           | 1.147                                                             | 1.167                                                             | 1.183                                                             | 1.181                                                             |
| $\mu$ /mm <sup>-1</sup>                             | 0.147                                                             | 0.122                                                             | 0.729                                                             | 0.728                                                             |
| <i>F</i> (000)                                      | 1224.0                                                            | 900.0                                                             | 1600.0                                                            | 1600.0                                                            |
| crystal size/mm <sup>3</sup>                        | 0.19x0.09x0.04                                                    | 0.48x0.39x0.3                                                     | 0.23x0.07x0.06                                                    | 0.02x0.01x0.01                                                    |
| index ranges                                        | -26 ≤ <i>h</i> ≤ 26<br>-9 ≤ <i>k</i> ≤ 11<br>-23 ≤ <i>l</i> ≤ 23  | -14 ≤ <i>h</i> ≤ 14<br>-23 ≤ <i>k</i> ≤ 24<br>-15 ≤ <i>l</i> ≤ 15 | -21 ≤ <i>h</i> ≤ 21<br>-17 ≤ <i>h</i> ≤ 16<br>-24 ≤ <i>l</i> ≤ 21 | -16 ≤ <i>h</i> ≤ 15<br>-18 ≤ <i>h</i> ≤ 20<br>-23 ≤ <i>l</i> ≤ 22 |
| Flack                                               |                                                                   |                                                                   | 0.058(18)                                                         | 0.12(5)                                                           |
| collected data                                      | 55442                                                             | 28644                                                             | 69132                                                             | 31628                                                             |
| unique data                                         | 7136                                                              | 9836                                                              | 18646                                                             | 8461                                                              |
|                                                     | ( <i>R</i> <sub>int</sub> = 0.1099)                               | ( <i>R</i> <sub>int</sub> = 0.0242)                               | ( <i>R</i> <sub>int</sub> = 0.1027)                               | ( <i>R</i> <sub>int</sub> = 0.1479)                               |
| data/restraints/parameters                          | 7136/97/413                                                       | 9836/1/548                                                        | 18646/1/967                                                       | 8461/0/484                                                        |
| GOF on <i>F</i> <sup>2</sup>                        | 1.038                                                             | 1.054                                                             | 1.071                                                             | 0.972                                                             |
| final <i>R</i> indices [ <i>I</i> > 2σ( <i>I</i> )] | <i>R</i> <sub>1</sub> = 0.0493<br><i>wR</i> <sub>2</sub> = 0.1012 | <i>R</i> <sub>1</sub> = 0.0383<br><i>wR</i> <sub>2</sub> = 0.1189 | <i>R</i> <sub>1</sub> = 0.0587<br><i>wR</i> <sub>2</sub> = 0.1315 | <i>R</i> <sub>1</sub> = 0.0837<br><i>wR</i> <sub>2</sub> = 0.1914 |
| <i>R</i> indices (all data)                         | <i>R</i> <sub>1</sub> = 0.0874<br><i>wR</i> <sub>2</sub> = 0.1203 | <i>R</i> <sub>1</sub> = 0.0400<br><i>wR</i> <sub>2</sub> = 0.1213 | <i>R</i> <sub>1</sub> = 0.1024<br><i>wR</i> <sub>2</sub> = 0.1526 | <i>R</i> <sub>1</sub> = 0.1517<br><i>wR</i> <sub>2</sub> = 0.2414 |
| Largest diff peak/hole (e·Å <sup>-3</sup> )         | 0.30/-0.24                                                        | 0.70/-0.28                                                        | 0.25/-0.41                                                        | 0.43/-0.53                                                        |

$$^a R_1 = \sum(|F_o| - |F_c|) / \sum|F_o|, wR_2 = [\sum w(F_o^2 - F_c^2)^2 / \sum w(F_o^2)]^{1/2}, \text{GOF} = [\sum w(F_o^2 - F_c^2)^2 / (N_o - N_p)]^{1/2}.$$

|                                           | <b>3c</b>                                          | <b>3d</b>                                           | <b>4</b>                                                         |
|-------------------------------------------|----------------------------------------------------|-----------------------------------------------------|------------------------------------------------------------------|
| CCDC No.                                  | 2223427                                            | 2223428                                             | 2204071                                                          |
| Empirical formula                         | C <sub>46</sub> H <sub>65</sub> N <sub>2</sub> PSi | C <sub>43</sub> H <sub>58</sub> FN <sub>2</sub> PSi | C <sub>64</sub> H <sub>91</sub> N <sub>2</sub> P <sub>3</sub> Si |
| formula weight                            | 705.06                                             | 680.97                                              | 1009.38                                                          |
| crystal system                            | triclinic                                          | tetragonal                                          | monoclinic                                                       |
| space group                               | <i>P</i> -1                                        | <i>P</i> 42/ <i>n</i>                               | <i>P</i> 2 <sub>1</sub> / <i>c</i>                               |
| <i>a</i> /Å                               | 11.1312(7)                                         | 26.734(2)                                           | 12.369(3)                                                        |
| <i>b</i> /Å                               | 11.1624(7)                                         | 26.734(2)                                           | 23.579(5)                                                        |
| <i>c</i> /Å                               | 18.2271(11)                                        | 10.4241(14)                                         | 19.827(5)                                                        |
| <i>α</i> /deg                             | 87.154(3)                                          | 90                                                  | 90                                                               |
| <i>β</i> /deg                             | 73.572(2)                                          | 90                                                  | 98.041(9)                                                        |
| <i>γ</i> /deg                             | 67.701(3)                                          | 90                                                  | 90                                                               |
| <i>V</i> /Å <sup>3</sup>                  | 2005.6(2)                                          | 7449.9(17)                                          | 5726(2)                                                          |
| <i>Z</i>                                  | 2                                                  | 8                                                   | 4                                                                |
| $\rho_{\text{calcd}}$ /g·cm <sup>-3</sup> | 1.168                                              | 1.214                                               | 1.171                                                            |
| $\mu$ /mm <sup>-1</sup>                   | 0.737                                              | 0.809                                               | 0.166                                                            |
| <i>F</i> (000)                            | 768                                                | 2944.0                                              | 2192.0                                                           |

|                                                     |                                     |                                     |                                     |
|-----------------------------------------------------|-------------------------------------|-------------------------------------|-------------------------------------|
| crystal size/mm <sup>3</sup>                        | 0.2x0.15x0.1                        | 0.306x0.074x0.0                     | 0.2x0.09x0.08                       |
|                                                     |                                     | 54                                  |                                     |
| index ranges                                        | -13 ≤ <i>h</i> ≤ 13                 | -33 ≤ <i>h</i> ≤ 34                 | -15 ≤ <i>h</i> ≤ 15                 |
|                                                     | -13 ≤ <i>k</i> ≤ 13                 | -34 ≤ <i>k</i> ≤ 34                 | -30 ≤ <i>k</i> ≤ 28                 |
|                                                     | -21 ≤ <i>l</i> ≤ 21                 | -13 ≤ <i>l</i> ≤ 13                 | -25 ≤ <i>l</i> ≤ 25                 |
| collected data                                      | 21618                               | 75128                               | 104984                              |
| unique data                                         | 7208                                | 8246                                | 12688                               |
|                                                     | ( <i>R</i> <sub>int</sub> = 0.0535) | ( <i>R</i> <sub>int</sub> = 0.1354) | ( <i>R</i> <sub>int</sub> = 0.1173) |
| data/restraints/parameters                          | 7208/0/459                          | 8246/0/439                          | 12688/237/691                       |
| GOF on <i>F</i> <sup>2</sup>                        | 1.137                               | 1.024                               | 1.056                               |
| final <i>R</i> indices [ <i>I</i> > 2σ( <i>I</i> )] | <i>R</i> <sub>1</sub> = 0.0709      | <i>R</i> <sub>1</sub> = 0.0672      | <i>R</i> <sub>1</sub> = 0.0702      |
|                                                     | <i>wR</i> <sub>2</sub> = 0.1840     | <i>wR</i> <sub>2</sub> = 0.1687     | <i>wR</i> <sub>2</sub> = 0.1728     |
| <i>R</i> indices (all data)                         | <i>R</i> <sub>1</sub> = 0.0822      | <i>R</i> <sub>1</sub> = 0.1112      | <i>R</i> <sub>1</sub> = 0.0886      |
|                                                     | <i>wR</i> <sub>2</sub> = 0.1899     | <i>wR</i> <sub>2</sub> = 0.1922     | <i>wR</i> <sub>2</sub> = 0.1860     |
| Largest diff peak/hole (e·Å <sup>-3</sup> )         | 0.68/-0.41                          | 0.73/-0.54                          | 0.89/-0.63                          |

<sup>a</sup>  $R_1 = \sum(|F_o| - |F_c|) / \sum |F_o|$ ,  $wR_2 = [\sum w(F_o^2 - F_c^2)^2 / \sum w(F_o^2)]^{1/2}$ ,  $GOF = [\sum w(F_o^2 - F_c^2)^2 / (N_o - N_p)]^{1/2}$ .

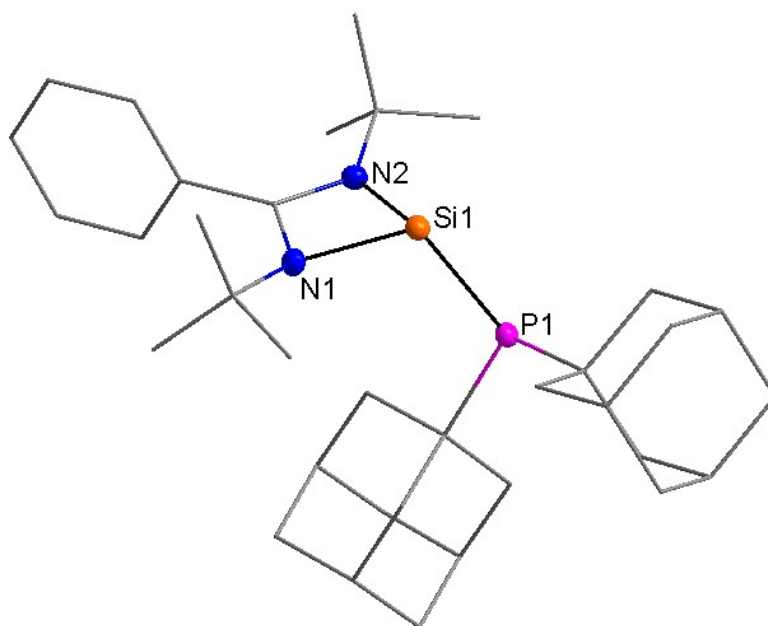

**Fig. S4** Molecular structures of **1**. H atoms are omitted for clarity.

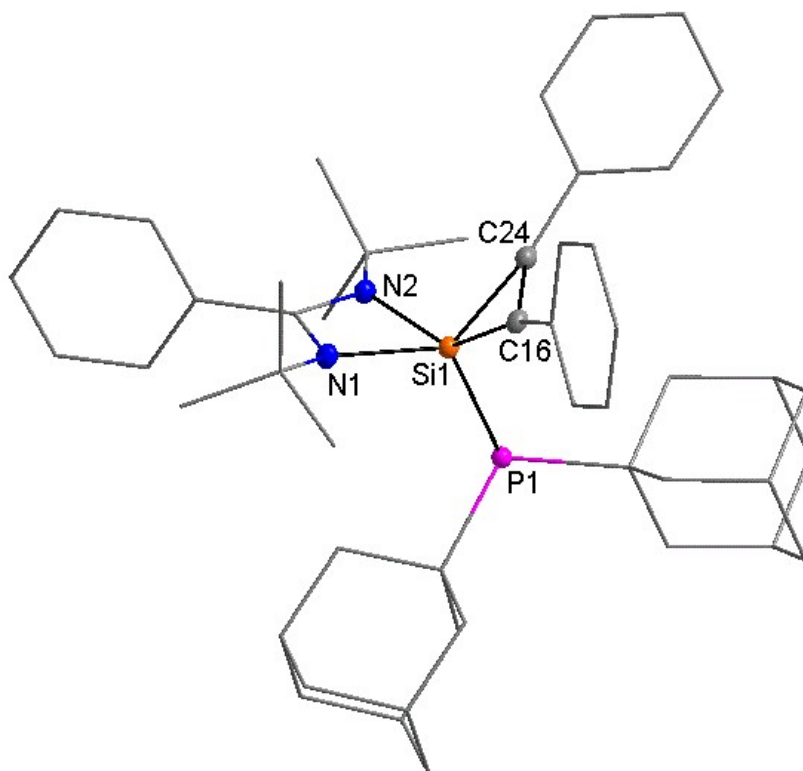

Fig. S5 Molecular structure of **2** (H atoms are omitted for clarity).

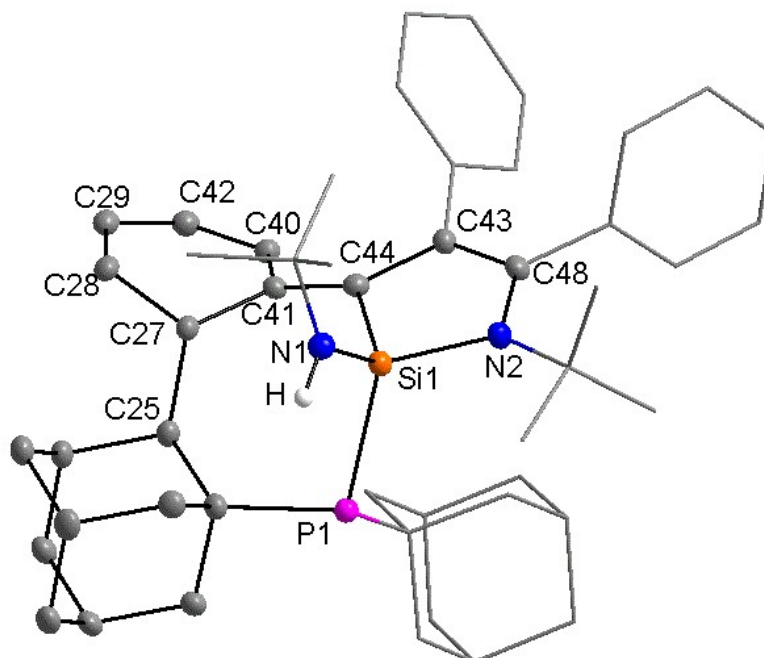

Fig. S6 Molecular structures of **3a(R)**. H atoms are omitted for clarity, except for *NH*.

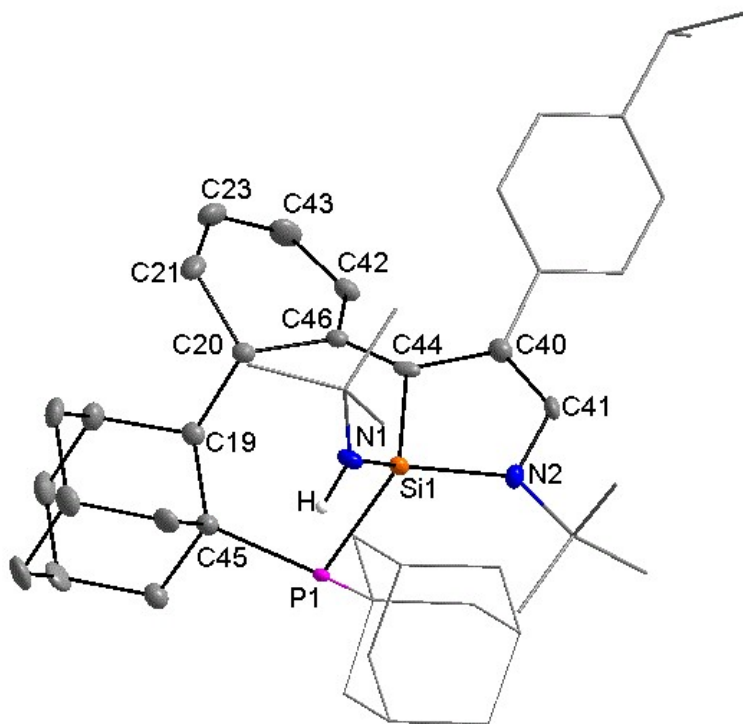

**Fig. S7** Molecular structures of **3c**. H atoms are omitted for clarity, except for *NH*.

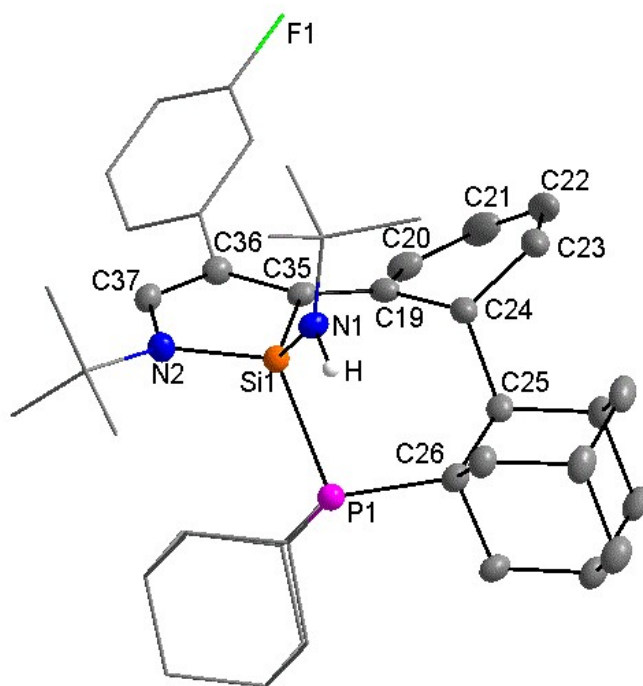

**Fig. S8** Molecular structures of **3d**. H atoms are omitted for clarity, except for *NH*.

#### IV. Theoretical calculations

The theoretical investigations were carried out through the DFT method under B3LYP-D3(BJ)/def2-SVP level of theory using Gaussian 16 B.01 program<sup>S4-S10</sup>. The maximum forces of all structures were calculated to be less than 0.000450 Hartree/Bohr. The frequency calculations were computed to be zero imaginary frequency and one imaginary frequency for minimum and transition state, respectively.

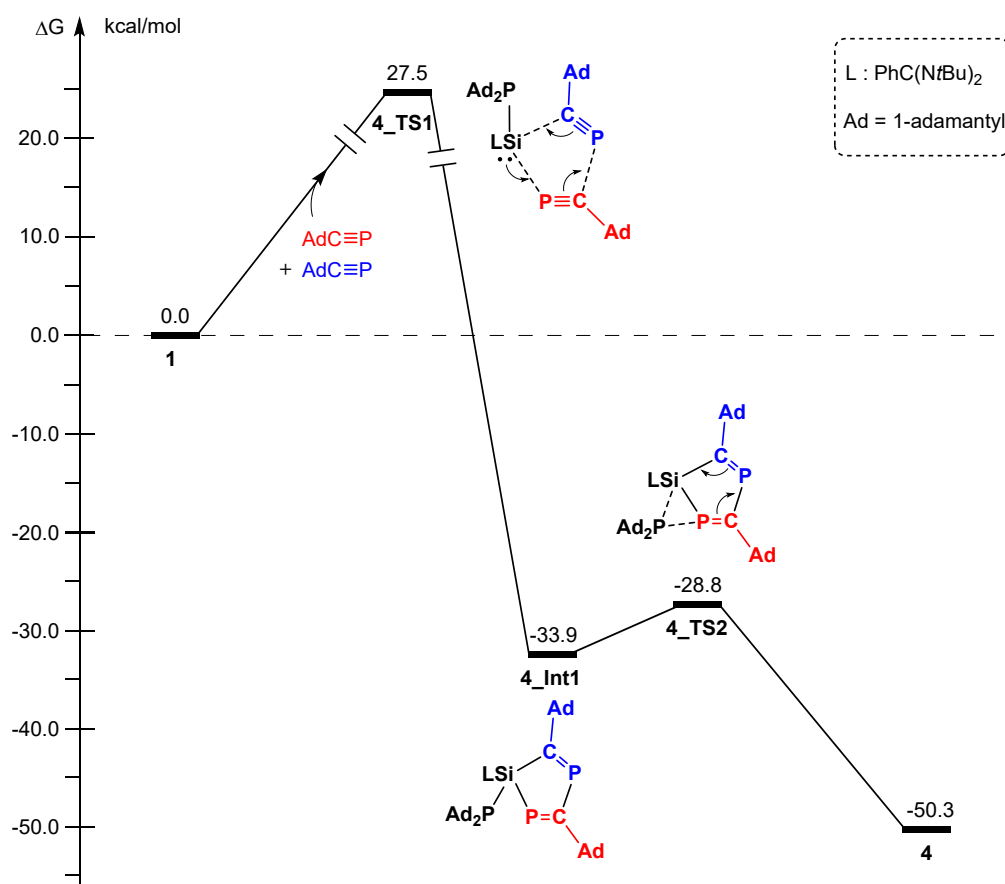

**Fig. S9** The free energy profile for the formation of **4** at the B3LYP-D3(BJ)/def2-SVP level of theory.

**Table S2** Cartesian coordinates for the formation of compound **3c** and **4**

**1** (LSi-PAd<sub>2</sub>, L = PhC(NtBu)<sub>2</sub>)

|    |            |            |            |
|----|------------|------------|------------|
| P  | 7.35417900 | 8.12353000 | 1.18745800 |
| Si | 7.17031300 | 6.32849200 | 2.65182200 |
| N  | 8.89358000 | 5.96095100 | 3.49030900 |
| N  | 8.22400800 | 5.03496100 | 1.66918600 |
| C  | 9.15340500 | 4.96236300 | 2.62872600 |
| C  | 9.36854200 | 6.15260000 | 4.87310200 |
| C  | 8.88953200 | 4.99634600 | 5.77075500 |
| H  | 7.79778700 | 4.88167600 | 5.69070500 |

|   |             |             |             |
|---|-------------|-------------|-------------|
| H | 9.14305700  | 5.19572100  | 6.82392700  |
| H | 9.36421200  | 4.04752300  | 5.48617700  |
| C | 10.90026900 | 6.27339100  | 4.94270400  |
| H | 11.39774400 | 5.32929600  | 4.68646500  |
| H | 11.20338400 | 6.54600500  | 5.96540200  |
| H | 11.26464200 | 7.05396500  | 4.25896800  |
| C | 8.73478700  | 7.45918000  | 5.37568800  |
| H | 9.07236300  | 8.31820200  | 4.78224900  |
| H | 9.00732200  | 7.63399900  | 6.42688600  |
| H | 7.63657600  | 7.40515100  | 5.31191900  |
| C | 10.24663100 | 3.95684700  | 2.73608100  |
| C | 10.03575700 | 2.70460200  | 3.32935300  |
| H | 9.05159400  | 2.45580300  | 3.72937600  |
| C | 11.07959500 | 1.77978400  | 3.41212700  |
| H | 10.90568400 | 0.80698400  | 3.87768900  |
| C | 12.34087900 | 2.09742600  | 2.90120400  |
| H | 13.15583800 | 1.37275800  | 2.96530800  |
| C | 12.55671900 | 3.34502600  | 2.30780200  |
| H | 13.53997300 | 3.59929400  | 1.90564000  |
| C | 11.51546000 | 4.27009000  | 2.22668500  |
| H | 11.67845700 | 5.24355900  | 1.76233700  |
| C | 7.94497900  | 4.14008900  | 0.53138400  |
| C | 7.35469500  | 2.81172700  | 1.04051600  |
| H | 8.09576600  | 2.23856600  | 1.61410300  |
| H | 7.02884100  | 2.18762300  | 0.19356700  |
| H | 6.48389700  | 3.00587300  | 1.68479400  |
| C | 9.20258300  | 3.87028700  | -0.31116900 |
| H | 9.66394500  | 4.81361000  | -0.63620200 |
| H | 8.92399300  | 3.29898200  | -1.20993500 |
| H | 9.95168900  | 3.28527100  | 0.23730700  |
| C | 6.89913100  | 4.84451500  | -0.34413300 |
| H | 5.98750500  | 5.06077600  | 0.23426200  |
| H | 6.62370700  | 4.19917200  | -1.19175300 |
| H | 7.27726500  | 5.80183000  | -0.72684800 |
| C | 6.27124200  | 9.49440400  | 1.96264000  |
| C | 6.90806500  | 10.30449600 | 3.10969400  |
| H | 7.81595800  | 10.81481900 | 2.75607300  |
| H | 7.21555900  | 9.62427000  | 3.91953100  |
| C | 5.92098300  | 11.35835900 | 3.64882600  |
| H | 6.40585100  | 11.92036300 | 4.46536400  |
| C | 4.65811600  | 10.66060800 | 4.17893500  |
| H | 3.95556600  | 11.40578300 | 4.59034200  |
| H | 4.92234000  | 9.97590800  | 5.00300600  |
| C | 3.99259600  | 9.87621700  | 3.03569800  |

|   |             |             |             |
|---|-------------|-------------|-------------|
| H | 3.09489900  | 9.35893900  | 3.41445500  |
| C | 4.98251500  | 8.82533700  | 2.50381400  |
| H | 4.51248000  | 8.22428500  | 1.70679500  |
| H | 5.23145300  | 8.12277400  | 3.31337600  |
| C | 5.83841100  | 10.47406000 | 0.83952800  |
| H | 6.71456500  | 10.97520800 | 0.40689300  |
| H | 5.36791000  | 9.90150900  | 0.02389500  |
| C | 4.86195000  | 11.53566700 | 1.37764500  |
| H | 4.59336200  | 12.22411500 | 0.55839700  |
| C | 3.59815500  | 10.84390500 | 1.90988300  |
| H | 3.09776300  | 10.29324900 | 1.09534300  |
| H | 2.87894300  | 11.59287900 | 2.28439400  |
| C | 5.53588800  | 12.32301900 | 2.51437900  |
| H | 6.43515700  | 12.83911300 | 2.13575500  |
| H | 4.85322400  | 13.10262300 | 2.89400700  |
| C | 9.14613900  | 8.74517600  | 0.94858200  |
| C | 9.83753600  | 7.64558700  | 0.10411400  |
| H | 9.81848200  | 6.69666100  | 0.65603700  |
| H | 9.26608100  | 7.48178000  | -0.82425000 |
| C | 11.28730600 | 8.03221900  | -0.23391700 |
| H | 11.74531900 | 7.22383000  | -0.82975000 |
| C | 12.08458500 | 8.23571100  | 1.06489700  |
| H | 12.11125400 | 7.29955700  | 1.64762600  |
| H | 13.13109800 | 8.49874200  | 0.83337600  |
| C | 11.42488700 | 9.34568300  | 1.89739400  |
| H | 11.98565100 | 9.48682200  | 2.83755500  |
| C | 9.97653400  | 8.94137500  | 2.23243500  |
| H | 9.52191900  | 9.71073100  | 2.87097400  |
| H | 9.97040700  | 8.00280000  | 2.79794400  |
| C | 9.17994800  | 10.05796300 | 0.13336800  |
| H | 8.58784300  | 9.94066800  | -0.78914400 |
| H | 8.72082100  | 10.87353400 | 0.71102800  |
| C | 10.63003900 | 10.45042400 | -0.20980200 |
| H | 10.61855000 | 11.38967400 | -0.78835400 |
| C | 11.28785500 | 9.33881600  | -1.04330100 |
| H | 10.73575000 | 9.19756900  | -1.98792900 |
| H | 12.32004200 | 9.62346800  | -1.31092000 |
| C | 11.42273500 | 10.65530400 | 1.09232200  |
| H | 12.45683600 | 10.96578400 | 0.86383800  |
| H | 10.96712600 | 11.46449800 | 1.68847800  |

**ArCCH (Ar = 4-*i*Pr-Ph)**

|   |              |            |             |
|---|--------------|------------|-------------|
| C | -10.18735500 | 1.09092200 | -0.08531800 |
| C | -11.37463900 | 1.21776900 | -0.30525100 |

|   |              |             |             |
|---|--------------|-------------|-------------|
| C | -8.78799100  | 0.94224100  | 0.17410100  |
| H | -12.42423300 | 1.32966100  | -0.49977300 |
| C | -8.12492000  | -0.26506800 | -0.11554700 |
| C | -8.04057700  | 2.00239400  | 0.72608000  |
| C | -6.67980800  | 1.85299400  | 0.97639400  |
| C | -6.01268500  | 0.65034000  | 0.68930100  |
| H | -8.54299200  | 2.94404000  | 0.95529400  |
| H | -6.12587700  | 2.69194300  | 1.40465000  |
| C | -6.76150900  | -0.40033000 | 0.14051300  |
| H | -8.69065500  | -1.09485900 | -0.54328000 |
| C | -4.52743200  | 0.48925800  | 0.96331000  |
| H | -6.26401900  | -1.34603400 | -0.09130600 |
| C | -3.68771900  | 1.46734700  | 0.12764200  |
| H | -4.25392700  | -0.53364800 | 0.65279000  |
| C | -4.21020200  | 0.61935900  | 2.46085500  |
| H | -4.44777900  | 1.62948400  | 2.83215000  |
| H | -3.13995500  | 0.43794200  | 2.65026200  |
| H | -4.79213500  | -0.10121000 | 3.05575900  |
| H | -3.89549700  | 1.35352000  | -0.94737600 |
| H | -2.61152900  | 1.29575700  | 0.29074800  |
| H | -3.90375600  | 2.51276800  | 0.40168200  |

### 3c\_TS1

|    |             |             |             |
|----|-------------|-------------|-------------|
| P  | -0.36630200 | 0.73509900  | -0.59402000 |
| Si | 0.29701000  | -1.27344700 | 0.31755600  |
| N  | 1.77108600  | -1.86844500 | -0.63024700 |
| N  | 1.81856200  | -1.16419300 | 1.40895700  |
| C  | -0.27580600 | -3.31798000 | 1.27449600  |
| C  | 3.97485800  | -2.14198000 | 0.54904300  |
| C  | -1.03916700 | -2.47566500 | 0.51741400  |
| C  | 2.55355200  | -1.72287400 | 0.44708600  |
| C  | 4.28881200  | -3.46719900 | 0.87844000  |
| H  | 3.48331200  | -4.17108000 | 1.09162200  |
| C  | -2.37154500 | 0.49109200  | 1.40618500  |
| H  | -2.81151400 | -0.23897000 | 0.72020800  |
| H  | -1.67778200 | -0.05869800 | 2.05799300  |
| C  | -1.61369600 | 1.57496000  | 0.60495700  |
| C  | -1.03482000 | 2.59001000  | 1.61341200  |
| H  | -0.49820400 | 3.39581400  | 1.09621500  |
| C  | 1.09140700  | 1.91702900  | -0.92953400 |
| C  | 5.00104600  | -1.22325700 | 0.29731400  |
| H  | 4.75035600  | -0.19453800 | 0.03790800  |
| C  | 1.95356100  | -2.62489400 | -1.88677800 |
| C  | 2.07131300  | -1.03778300 | 2.86024000  |



|   |             |             |             |
|---|-------------|-------------|-------------|
| C | -2.15760700 | 3.21348800  | 2.46692200  |
| C | -3.49008800 | 1.10709000  | 2.26293800  |
| H | -3.99507000 | 0.29457800  | 2.81111900  |
| C | 2.05095700  | 2.17973000  | 0.24862700  |
| H | 1.51575300  | 2.62488800  | 1.09696100  |
| H | 2.45589800  | 1.22110000  | 0.60085500  |
| C | 0.55009200  | 3.26283200  | -1.47215100 |
| H | -0.11444600 | 3.06964900  | -2.33040000 |
| H | -0.05400200 | 3.77635900  | -0.71266000 |
| C | 1.70802200  | 4.18504300  | -1.89533500 |
| H | 1.28955400  | 5.13980800  | -2.25574000 |
| C | 1.91618500  | 1.27017500  | -2.06892700 |
| H | 2.31094700  | 0.30472500  | -1.72777500 |
| H | 1.25778000  | 1.06386300  | -2.92823400 |
| C | 5.62412900  | -3.86936100 | 0.94431500  |
| H | 5.86532400  | -4.90295500 | 1.20219200  |
| C | -3.15819300 | 3.93604800  | 1.54894600  |
| H | -3.94999600 | 4.41149200  | 2.15272800  |
| H | -2.64835800 | 4.74249600  | 0.99387100  |
| C | -2.88409000 | 2.11179800  | 3.25359000  |
| H | -3.67272200 | 2.55272400  | 3.88725900  |
| H | -2.17664300 | 1.59874600  | 3.92751500  |
| C | -3.77284800 | 2.92604500  | 0.56613900  |
| H | -4.48571300 | 3.44145500  | -0.09959800 |
| C | 6.33483800  | -1.62972300 | 0.36306100  |
| H | 7.13088300  | -0.90975300 | 0.16079000  |
| C | -2.65627200 | 2.29976400  | -0.28855600 |
| H | -2.16740100 | 3.08142900  | -0.88952200 |
| H | -3.08452200 | 1.57463600  | -0.99826700 |
| C | 3.07625600  | 2.18178200  | -2.50719400 |
| H | 3.64132100  | 1.67979700  | -3.31119600 |
| C | 3.19969400  | 3.11238100  | -0.18146300 |
| H | 3.85784800  | 3.29555200  | 0.68501700  |
| C | 2.62064700  | 4.44548900  | -0.68427000 |
| H | 3.43687900  | 5.13300600  | -0.96460100 |
| H | 2.04823700  | 4.93675800  | 0.12114900  |
| C | 6.64802100  | -2.95362600 | 0.68420800  |
| H | 7.69183600  | -3.27186000 | 0.73440800  |
| C | 2.51393300  | 3.51624500  | -3.01986500 |
| H | 3.33515900  | 4.17625800  | -3.34786600 |
| H | 1.86697200  | 3.34377500  | -3.89650400 |
| C | -4.49826200 | 1.81990200  | 1.34854500  |
| H | -4.94876700 | 1.09457900  | 0.65070700  |
| H | -5.31959700 | 2.25104700  | 1.94666900  |

|   |             |             |             |
|---|-------------|-------------|-------------|
| C | 0.76410900  | -2.25843000 | -2.78656500 |
| H | 0.72150600  | -1.17771300 | -2.97565200 |
| H | -0.18322100 | -2.56289100 | -2.31878000 |
| H | 0.85001600  | -2.78116700 | -3.75026600 |
| C | 4.00316700  | 2.45019900  | -1.31138200 |
| H | 4.84278400  | 3.09744200  | -1.61710600 |
| H | 4.44465200  | 1.50446400  | -0.95700600 |
| C | 3.18441400  | -0.01734600 | 3.14171300  |
| H | 4.12829300  | -0.30767500 | 2.66009700  |
| H | 3.36552600  | 0.04007000  | 4.22615800  |
| H | 2.90218300  | 0.98417000  | 2.78735700  |
| C | 1.90554400  | -4.13555500 | -1.59283100 |
| H | 2.80079200  | -4.46204600 | -1.04692400 |
| H | 1.86231900  | -4.70069500 | -2.53692200 |
| H | 1.02141500  | -4.37419200 | -0.98574800 |
| C | 2.41969200  | -2.40749900 | 3.46939600  |
| H | 1.69680600  | -3.15140400 | 3.10196800  |
| H | 2.36505000  | -2.34831400 | 4.56760200  |
| H | 3.43851700  | -2.72039900 | 3.20527800  |
| C | 0.75545600  | -0.54653000 | 3.47288100  |
| H | 0.44810700  | 0.40538100  | 3.01932600  |
| H | 0.87544100  | -0.38811200 | 4.55431300  |
| H | -0.03879000 | -1.29003400 | 3.31290700  |
| C | 3.26947700  | -2.26372300 | -2.59250500 |
| H | 3.33505200  | -1.18444900 | -2.79154600 |
| H | 3.31697800  | -2.79069900 | -3.55751300 |
| H | 4.14722000  | -2.56340200 | -2.00555200 |
| H | -0.30509500 | 2.09406500  | 2.26995300  |
| H | -1.70743400 | 3.93749900  | 3.16737000  |
| H | -0.79613900 | -4.23928400 | 1.62543300  |
| C | -2.45232600 | -2.52627300 | 0.08064900  |
| C | -5.20419700 | -2.50677000 | -0.66292200 |
| C | -3.42319000 | -3.16345300 | 0.86997100  |
| C | -2.88473700 | -1.90206300 | -1.10445100 |
| C | -4.23051200 | -1.89276700 | -1.46693800 |
| C | -4.76984400 | -3.15079100 | 0.50474900  |
| H | -3.11113700 | -3.65043900 | 1.79723800  |
| H | -2.15628900 | -1.37669700 | -1.72579100 |
| H | -4.52765700 | -1.38321900 | -2.38757400 |
| H | -5.50798600 | -3.63641300 | 1.15047000  |
| C | -6.68031500 | -2.43800900 | -1.01522000 |
| H | -7.21475600 | -3.06788700 | -0.28305700 |
| C | -6.97560500 | -3.00194900 | -2.41220400 |
| H | -6.49168700 | -2.39932400 | -3.19784900 |

|   |             |             |             |
|---|-------------|-------------|-------------|
| H | -8.05909700 | -3.00070900 | -2.61466400 |
| H | -6.60800700 | -4.03507900 | -2.50971600 |
| C | -7.21582700 | -1.00423600 | -0.86904400 |
| H | -6.71576800 | -0.32364300 | -1.57757300 |
| H | -7.03762700 | -0.61611900 | 0.14578000  |
| H | -8.29914900 | -0.96237300 | -1.06958700 |

### 3c\_Int1

|    |             |            |             |
|----|-------------|------------|-------------|
| P  | 6.31653200  | 5.46617800 | 15.72728100 |
| Si | 7.95233900  | 7.01906800 | 15.17902600 |
| N  | 9.51435700  | 5.67267300 | 15.39705000 |
| N  | 8.97473700  | 6.78214500 | 13.60359700 |
| C  | 7.45020400  | 8.80475400 | 15.22830600 |
| C  | 11.02108800 | 5.31314700 | 13.43912900 |
| C  | 8.27105900  | 8.46326800 | 16.25267000 |
| C  | 9.86739700  | 5.92123300 | 14.16054300 |
| C  | 12.31329800 | 5.83652700 | 13.56548900 |
| H  | 12.48396900 | 6.71118800 | 14.19451100 |
| C  | 5.33026400  | 7.28907900 | 17.56098100 |
| H  | 5.74374100  | 6.57697000 | 18.29533500 |
| H  | 6.14154300  | 7.96980000 | 17.28660300 |
| C  | 4.82813100  | 6.50490300 | 16.31808200 |
| C  | 4.21901400  | 7.48793100 | 15.30047100 |
| H  | 3.81844600  | 6.93013200 | 14.43929000 |
| C  | 5.93131600  | 4.59868100 | 14.06432200 |
| C  | 10.80574500 | 4.19362500 | 12.62307300 |
| H  | 9.79987300  | 3.78563700 | 12.52395700 |
| C  | 10.15857700 | 4.83254900 | 16.42205300 |
| C  | 9.22051400  | 7.69037100 | 12.44862500 |
| C  | 3.08206100  | 8.29933000 | 15.95054800 |
| C  | 4.19144400  | 8.10287900 | 18.19723500 |
| H  | 4.59529800  | 8.66587700 | 19.05551100 |
| C  | 5.86611700  | 5.50436900 | 12.82076900 |
| H  | 5.05217600  | 6.23727700 | 12.92106500 |
| H  | 6.80019400  | 6.06834400 | 12.74522000 |
| C  | 4.62303600  | 3.78083100 | 14.13494200 |
| H  | 4.62531300  | 3.13520600 | 15.02920500 |
| H  | 3.76345800  | 4.46051100 | 14.22463400 |
| C  | 4.43915900  | 2.93282000 | 12.86040700 |
| H  | 3.49948900  | 2.36164200 | 12.94723300 |
| C  | 7.10057300  | 3.59769100 | 13.87572200 |
| H  | 8.05001900  | 4.14548900 | 13.83783200 |
| H  | 7.15686400  | 2.93187600 | 14.75250900 |
| C  | 13.37884200 | 5.24851100 | 12.87974300 |

|   |             |            |             |
|---|-------------|------------|-------------|
| H | 14.38312800 | 5.66568300 | 12.98017900 |
| C | 1.97813200  | 7.33846000 | 16.42348000 |
| H | 1.13992500  | 7.90577200 | 16.86351100 |
| H | 1.57151800  | 6.77867200 | 15.56338200 |
| C | 3.63058600  | 9.08478600 | 17.15395800 |
| H | 2.83093600  | 9.69971700 | 17.60191100 |
| H | 4.42490700  | 9.77559600 | 16.82385100 |
| C | 2.55767800  | 6.36292400 | 17.46268600 |
| H | 1.77219100  | 5.66007500 | 17.78913200 |
| C | 11.87127200 | 3.60525200 | 11.94411900 |
| H | 11.69423100 | 2.73206100 | 11.31253800 |
| C | 3.70786200  | 5.55850000 | 16.82532800 |
| H | 3.29962200  | 4.95976600 | 16.00276600 |
| H | 4.12985600  | 4.84991400 | 17.55721300 |
| C | 6.92355400  | 2.76821800 | 12.59335600 |
| H | 7.78030100  | 2.07910400 | 12.48805200 |
| C | 5.67100800  | 4.67125300 | 11.53946700 |
| H | 5.62516400  | 5.35166500 | 10.67128900 |
| C | 4.36619100  | 3.86566600 | 11.63889800 |
| H | 4.20810000  | 3.27691300 | 10.71852600 |
| H | 3.50584300  | 4.55015900 | 11.73670800 |
| C | 13.16072000 | 4.13211100 | 12.06902000 |
| H | 13.99460500 | 3.67215900 | 11.53436000 |
| C | 5.61962100  | 1.96196000 | 12.69505000 |
| H | 5.47954200  | 1.34248900 | 11.79226600 |
| H | 5.66826900  | 1.27372200 | 13.55644600 |
| C | 3.07985200  | 7.15561800 | 18.66934100 |
| H | 3.47173700  | 6.46556200 | 19.43579100 |
| H | 2.25832800  | 7.72628100 | 19.13619700 |
| C | 9.14608600  | 4.63449300 | 17.55966800 |
| H | 8.28500200  | 4.04081200 | 17.22914400 |
| H | 8.75076200  | 5.59791000 | 17.90884100 |
| H | 9.63387800  | 4.12789600 | 18.40629100 |
| C | 6.85736300  | 3.70658200 | 11.37604200 |
| H | 6.74988100  | 3.11911500 | 10.44774900 |
| H | 7.79551900  | 4.27980700 | 11.28713500 |
| C | 9.79552900  | 6.95755600 | 11.22190200 |
| H | 10.84140200 | 6.65589800 | 11.34724400 |
| H | 9.74741600  | 7.63353300 | 10.35448900 |
| H | 9.19994300  | 6.06312400 | 10.98719600 |
| C | 11.38819400 | 5.58077500 | 16.97262000 |
| H | 12.16752700 | 5.68330900 | 16.20507000 |
| H | 11.82220300 | 5.02932400 | 17.82152900 |
| H | 11.10426200 | 6.58555800 | 17.31830600 |

|   |             |             |             |
|---|-------------|-------------|-------------|
| C | 10.18850200 | 8.80432100  | 12.89192400 |
| H | 9.76976300  | 9.36599700  | 13.73888800 |
| H | 10.37961200 | 9.50558600  | 12.06410100 |
| H | 11.15477900 | 8.38113300  | 13.20381600 |
| C | 7.89120600  | 8.32540700  | 12.00427100 |
| H | 7.23279800  | 7.58430400  | 11.52832600 |
| H | 8.10294300  | 9.10989300  | 11.26111100 |
| H | 7.35428600  | 8.77459600  | 12.84736000 |
| C | 10.57067400 | 3.44417700  | 15.90045200 |
| H | 9.72456600  | 2.95304300  | 15.39806300 |
| H | 10.87348200 | 2.81335700  | 16.75026600 |
| H | 11.41456800 | 3.48830200  | 15.20150100 |
| H | 4.99870900  | 8.16044500  | 14.91506500 |
| H | 2.66916400  | 9.00161400  | 15.20634100 |
| C | 8.84787900  | 9.19510000  | 17.38074300 |
| C | 8.95683700  | 10.59732000 | 17.35460600 |
| C | 9.29022500  | 8.52587400  | 18.53594500 |
| C | 9.48386600  | 11.29561400 | 18.43975700 |
| H | 8.62458500  | 11.13866300 | 16.46506200 |
| C | 9.80956200  | 9.22866400  | 19.62187100 |
| H | 9.20647800  | 7.43975600  | 18.57989200 |
| C | 9.91826700  | 10.62788800 | 19.59532600 |
| H | 9.56167700  | 12.38586100 | 18.39414100 |
| H | 10.13601400 | 8.67486300  | 20.50603500 |
| H | 6.98172100  | 9.77091000  | 14.98720100 |
| C | 10.49684300 | 11.39685800 | 20.77046700 |
| H | 10.42371800 | 12.46989500 | 20.51990700 |
| C | 9.69304500  | 11.16599400 | 22.05790900 |
| C | 11.98403100 | 11.07051000 | 20.97730700 |
| H | 10.08742700 | 11.78455200 | 22.87966200 |
| H | 8.63178500  | 11.41741700 | 21.91697000 |
| H | 9.74671400  | 10.11264900 | 22.37819000 |
| H | 12.12275600 | 10.00668400 | 21.23055000 |
| H | 12.56604100 | 11.27656300 | 20.06635200 |
| H | 12.40949700 | 11.66886900 | 21.79896600 |

### 3c\_TS2

|    |            |             |             |
|----|------------|-------------|-------------|
| P  | 4.65324200 | 6.87493300  | 14.45565500 |
| Si | 4.94151600 | 9.06822300  | 13.96927900 |
| N  | 3.95035500 | 10.32911900 | 14.19816000 |
| N  | 6.73294100 | 9.62395600  | 14.43837500 |
| C  | 6.12972800 | 10.64493200 | 16.68703300 |
| C  | 7.38461900 | 8.44629200  | 16.47440000 |
| C  | 4.76937600 | 10.67325700 | 16.64994200 |

|   |             |             |             |
|---|-------------|-------------|-------------|
| H | 4.29058700  | 11.52437900 | 17.16314800 |
| C | 6.81877900  | 9.55413600  | 15.93561800 |
| C | 8.21297100  | 7.40861400  | 15.70153800 |
| H | 8.52447700  | 7.81914600  | 14.73458200 |
| C | 7.02083300  | 11.63574200 | 17.39194900 |
| C | 8.34943900  | 11.34591000 | 17.75835300 |
| H | 8.75298000  | 10.36244400 | 17.55835000 |
| C | 6.91069100  | 6.22737200  | 12.92743700 |
| H | 6.09994600  | 6.15058600  | 12.19168600 |
| H | 7.29702000  | 7.25454700  | 12.86868500 |
| C | 6.33602800  | 5.92881300  | 14.34830800 |
| C | 7.49685000  | 6.00836300  | 15.42582200 |
| H | 7.09731400  | 5.68643900  | 16.39077500 |
| C | 3.73926300  | 6.56759000  | 16.12451300 |
| C | 9.14758100  | 12.29532600 | 18.40043300 |
| H | 10.16559400 | 12.03486600 | 18.67504300 |
| C | 8.66307900  | 13.57136600 | 18.70658900 |
| C | 7.33665500  | 8.28044000  | 17.93386700 |
| H | 6.51958000  | 8.76334600  | 18.45707800 |
| C | 2.59887300  | 10.81307700 | 13.84326900 |
| C | 7.37467800  | 10.86986800 | 13.70608200 |
| C | 8.59959600  | 4.96994500  | 15.00159400 |
| H | 9.39552000  | 5.00773600  | 15.74930100 |
| C | 8.04381800  | 5.23801000  | 12.55590300 |
| H | 8.43521700  | 5.50289600  | 11.56481600 |
| C | 4.63394700  | 6.24297300  | 17.34227300 |
| H | 5.20515000  | 5.32609600  | 17.15400000 |
| H | 5.34410900  | 7.05214600  | 17.51400000 |
| C | 2.75933000  | 5.37094700  | 15.89830700 |
| H | 2.11407000  | 5.58917800  | 15.03844300 |
| H | 3.32042500  | 4.45662200  | 15.67245100 |
| C | 1.89208100  | 5.13914000  | 17.16430100 |
| H | 1.22118400  | 4.28862600  | 16.98261000 |
| C | 2.88548600  | 7.82903500  | 16.43239400 |
| H | 3.52622500  | 8.71197400  | 16.57258000 |
| H | 2.22413100  | 8.02918500  | 15.58006400 |
| C | 9.49943600  | 7.15955800  | 16.49872500 |
| H | 10.39506500 | 6.90672800  | 15.94210100 |
| C | 8.04844200  | 3.52917600  | 14.97320400 |
| H | 8.86433000  | 2.83404100  | 14.73202700 |
| H | 7.65621700  | 3.25981400  | 15.96291300 |
| C | 6.54073400  | 12.92526500 | 17.70136600 |
| H | 5.52668500  | 13.18618100 | 17.42107800 |
| C | 9.17314200  | 5.31550500  | 13.60691600 |

|   |             |             |             |
|---|-------------|-------------|-------------|
| H | 9.96584300  | 4.59946000  | 13.35115600 |
| H | 9.62433800  | 6.31639600  | 13.60366900 |
| C | 6.93112100  | 3.43752100  | 13.92215400 |
| H | 6.50635100  | 2.42514000  | 13.90419700 |
| C | 8.33154600  | 7.64111800  | 18.58541600 |
| H | 8.31670800  | 7.53629700  | 19.66384000 |
| C | 5.82626200  | 4.43565900  | 14.31492600 |
| H | 5.43372500  | 4.16785700  | 15.30179700 |
| H | 4.99900400  | 4.37313000  | 13.59770400 |
| C | 9.54587500  | 14.60050300 | 19.40709200 |
| H | 10.52114700 | 14.12985200 | 19.58908800 |
| C | 2.01731200  | 7.59874400  | 17.69261500 |
| H | 1.43743100  | 8.51053100  | 17.88882800 |
| C | 3.76224000  | 6.02594900  | 18.60755800 |
| H | 4.42429500  | 5.80966300  | 19.45681000 |
| C | 2.80751600  | 4.83220900  | 18.37304500 |
| H | 2.19569100  | 4.65913200  | 19.26880300 |
| H | 3.39008300  | 3.92064200  | 18.18026800 |
| C | 9.51038800  | 7.20217400  | 17.84119500 |
| H | 10.41334500 | 6.96522400  | 18.39454400 |
| C | 1.05989200  | 6.40750600  | 17.46348000 |
| H | 0.43798400  | 6.24358500  | 18.35445400 |
| H | 0.39175300  | 6.62351000  | 16.61885800 |
| C | 7.47974100  | 3.79874000  | 12.52420700 |
| H | 6.67702000  | 3.72766200  | 11.77841500 |
| H | 8.27299200  | 3.09561500  | 12.23713000 |
| C | 1.90065300  | 11.31994700 | 15.13079000 |
| H | 1.81049600  | 10.50740800 | 15.85383900 |
| H | 0.90616200  | 11.70303700 | 14.87441700 |
| H | 2.49356300  | 12.11845000 | 15.58227800 |
| C | 7.33970400  | 13.86657000 | 18.34217000 |
| H | 6.92982900  | 14.84882600 | 18.55461800 |
| C | 2.94067900  | 7.30329900  | 18.89740700 |
| H | 2.34126900  | 7.16357300  | 19.80750100 |
| H | 3.61585200  | 8.15383200  | 19.05779400 |
| C | 8.85237500  | 10.93227900 | 14.13312700 |
| H | 8.93712500  | 11.12377500 | 15.20535700 |
| H | 9.33473400  | 11.75486300 | 13.59429100 |
| H | 9.38091700  | 10.00365200 | 13.88417300 |
| C | 1.73094100  | 9.71804700  | 13.17776100 |
| H | 2.21132900  | 9.37245400  | 12.25567600 |
| H | 0.73755100  | 10.11374500 | 12.93566400 |
| H | 1.61649100  | 8.86633000  | 13.85332700 |
| C | 6.64656200  | 12.17790700 | 14.04485400 |

|   |             |             |             |
|---|-------------|-------------|-------------|
| H | 5.56978400  | 12.03436100 | 13.95251400 |
| H | 6.98870200  | 12.94334000 | 13.33817900 |
| H | 6.87765300  | 12.50342400 | 15.05855100 |
| C | 7.26780000  | 10.56289900 | 12.19794600 |
| H | 7.73971000  | 9.60393900  | 11.94871100 |
| H | 7.78759300  | 11.35206600 | 11.64487900 |
| H | 6.22205300  | 10.53738300 | 11.87949700 |
| C | 2.75877200  | 12.00046800 | 12.85952500 |
| H | 3.36853100  | 12.78266600 | 13.32083400 |
| H | 1.77691800  | 12.41423200 | 12.60182100 |
| H | 3.25357200  | 11.66002900 | 11.94359300 |
| C | 8.94837800  | 15.01446300 | 20.77484600 |
| H | 7.97395800  | 15.49532200 | 20.63435300 |
| H | 9.61206200  | 15.72345500 | 21.28415300 |
| H | 8.80977400  | 14.13804500 | 21.41617200 |
| C | 9.77183100  | 15.84592200 | 18.51386000 |
| H | 10.21813700 | 15.55814700 | 17.55627800 |
| H | 10.43778200 | 16.55999200 | 19.01298300 |
| H | 8.81858700  | 16.34728900 | 18.31257200 |
| H | 7.28999800  | 8.83186500  | 14.08267400 |

### 3c\_Int2

|    |             |             |             |
|----|-------------|-------------|-------------|
| P  | 5.55635700  | 10.91526700 | 14.54182900 |
| Si | 5.63840800  | 8.88415100  | 13.32607200 |
| N  | 5.93170900  | 7.30113600  | 14.33335000 |
| N  | 7.51418300  | 9.01537400  | 12.79549700 |
| C  | 8.31692000  | 7.65274400  | 14.66193400 |
| C  | 9.92202300  | 8.40623700  | 12.95376700 |
| C  | 7.06650700  | 7.13327500  | 15.00283400 |
| C  | 8.50498300  | 8.39590100  | 13.44389100 |
| C  | 10.35167500 | 7.48966900  | 11.98561300 |
| H  | 9.64032300  | 6.77948200  | 11.56180000 |
| C  | 9.43102400  | 7.21525500  | 15.56950800 |
| C  | 10.57609900 | 6.51427400  | 15.14993100 |
| H  | 10.71908500 | 6.27964100  | 14.09833500 |
| C  | 3.67701000  | 10.46230400 | 16.75524100 |
| C  | 3.80717900  | 10.99983000 | 15.31413500 |
| C  | 3.33185400  | 12.47775700 | 15.29148800 |
| H  | 3.40434200  | 12.86043200 | 14.26097000 |
| C  | 6.85464700  | 11.36647700 | 15.86853000 |
| C  | 11.54323500 | 6.09136900  | 16.06166700 |
| H  | 12.42141600 | 5.55537300  | 15.69037700 |
| C  | 11.41411400 | 6.32424900  | 17.43688200 |
| C  | 10.86009200 | 9.25581600  | 13.55360200 |



|   |             |             |             |
|---|-------------|-------------|-------------|
| C | 4.85339000  | 6.28307800  | 14.56357800 |
| C | 7.69880300  | 9.71472600  | 11.44212100 |
| C | 1.88674200  | 12.60515200 | 15.80748900 |
| H | 1.59329600  | 13.66866300 | 15.79556400 |
| C | 2.22523800  | 10.58344100 | 17.25937400 |
| H | 2.16908300  | 10.19202000 | 18.28966600 |
| C | 6.51490200  | 12.70500200 | 16.56405200 |
| H | 6.32841600  | 13.48106400 | 15.80378100 |
| H | 5.59493600  | 12.60688600 | 17.15743500 |
| C | 8.16571200  | 11.58376900 | 15.07154200 |
| H | 8.43076500  | 10.65383200 | 14.55510100 |
| H | 7.99632400  | 12.34360500 | 14.29148400 |
| C | 9.31707600  | 12.01876900 | 15.99275200 |
| H | 10.23067100 | 12.15728000 | 15.38794100 |
| C | 7.12137900  | 10.30079500 | 16.94709400 |
| H | 6.21671400  | 10.12045400 | 17.54401700 |
| H | 7.36625300  | 9.35643000  | 16.44684700 |
| C | 11.68861600 | 7.46014900  | 11.58326800 |
| H | 12.01054900 | 6.74408100  | 10.82353200 |
| C | 0.94807800  | 11.79818600 | 14.89809700 |
| H | -0.09667800 | 11.89289100 | 15.24168700 |
| H | 0.98817700  | 12.19311300 | 13.86882900 |
| C | 9.29063600  | 7.41477000  | 16.95680300 |
| H | 8.41080400  | 7.93358400  | 17.33434800 |
| C | 1.80403700  | 12.06268400 | 17.24442800 |
| H | 0.77666500  | 12.16903200 | 17.63343000 |
| H | 2.46219400  | 12.64909500 | 17.90859000 |
| C | 1.38055400  | 10.32447200 | 14.91367800 |
| H | 0.72590600  | 9.73659400  | 14.24785000 |
| C | 12.19583900 | 9.22470400  | 13.15508200 |
| H | 12.91585100 | 9.89698600  | 13.62702400 |
| C | 2.83193900  | 10.19925300 | 14.41893300 |
| H | 2.91385000  | 10.53952700 | 13.37391500 |
| H | 3.11634200  | 9.13793500  | 14.41949400 |
| C | 12.48722400 | 5.88014100  | 18.41535000 |
| H | 13.26364300 | 5.36223700  | 17.82628700 |
| C | 8.27239700  | 10.73610500 | 17.87637700 |
| H | 8.44029500  | 9.95653800  | 18.63939200 |
| C | 7.66136300  | 13.14163500 | 17.49665600 |
| H | 7.38178700  | 14.08990200 | 17.98654400 |
| C | 8.94671200  | 13.34266800 | 16.67852800 |
| H | 9.76881300  | 13.67691400 | 17.33465100 |
| H | 8.79346200  | 14.13150600 | 15.92256800 |
| C | 12.61358000 | 8.33346800  | 12.16227900 |

|   |             |             |             |
|---|-------------|-------------|-------------|
| H | 13.66017300 | 8.31016700  | 11.85006300 |
| C | 9.55776100  | 10.93682800 | 17.05730100 |
| H | 10.38830700 | 11.23317600 | 17.72107600 |
| H | 9.85212700  | 9.98806000  | 16.58258700 |
| C | 1.28832600  | 9.77597800  | 16.34702500 |
| H | 1.57038200  | 8.70911600  | 16.36304100 |
| H | 0.24966500  | 9.83899200  | 16.71493200 |
| C | 3.77232600  | 6.39637700  | 13.47993500 |
| H | 3.25385800  | 7.36281300  | 13.50144500 |
| H | 3.02704600  | 5.60228400  | 13.64013400 |
| H | 4.20290500  | 6.27492700  | 12.47552800 |
| C | 10.25521700 | 6.98386200  | 17.86672600 |
| H | 10.09874600 | 7.18036400  | 18.93047100 |
| C | 7.89400400  | 12.05840000 | 18.56418700 |
| H | 8.69549400  | 12.37210900 | 19.25495400 |
| H | 6.98102100  | 11.92282000 | 19.16936600 |
| C | 6.58384700  | 10.75870000 | 11.22933500 |
| H | 5.58125900  | 10.31251000 | 11.26613100 |
| H | 6.71989400  | 11.19810200 | 10.23060200 |
| H | 6.62317200  | 11.55623500 | 11.98187500 |
| C | 4.22264500  | 6.50132100  | 15.94767700 |
| H | 4.97444500  | 6.43163500  | 16.74900000 |
| H | 3.44762600  | 5.74476800  | 16.14515100 |
| H | 3.75639500  | 7.49419900  | 16.00642900 |
| C | 7.56539200  | 8.65248900  | 10.33940500 |
| H | 8.36664100  | 7.90572800  | 10.39033500 |
| H | 7.61461800  | 9.13358200  | 9.35023900  |
| H | 6.59560700  | 8.13965500  | 10.42701100 |
| C | 9.01559000  | 10.50521500 | 11.29901000 |
| H | 9.21273700  | 11.10748000 | 12.19588400 |
| H | 8.89409500  | 11.19941400 | 10.45496400 |
| H | 9.89215000  | 9.88920600  | 11.08608500 |
| C | 5.45481500  | 4.86759400  | 14.46627800 |
| H | 5.96605200  | 4.73612500  | 13.50045000 |
| H | 4.65472800  | 4.11581600  | 14.53981100 |
| H | 6.17767400  | 4.65801500  | 15.26730100 |
| C | 11.94446600 | 4.88051700  | 19.44712000 |
| H | 11.17250600 | 5.34371100  | 20.08286900 |
| H | 12.75008100 | 4.52386400  | 20.10921200 |
| H | 11.49147000 | 4.00647000  | 18.95445300 |
| C | 13.15195100 | 7.08327400  | 19.10169200 |
| H | 13.56787600 | 7.78332600  | 18.36088700 |
| H | 13.96931400 | 6.75632500  | 19.76485800 |
| H | 12.42522300 | 7.64008500  | 19.71534100 |

|   |             |             |             |
|---|-------------|-------------|-------------|
| H | 3.99383800  | 13.10320400 | 15.90498300 |
| H | 7.06116400  | 6.44274900  | 15.85462400 |
| H | 4.33418200  | 11.02401100 | 17.43351100 |
| H | 10.54041400 | 9.94360300  | 14.33599200 |
| H | 4.00781100  | 9.41299400  | 16.79325300 |

### 3c\_TS3

|    |            |             |             |
|----|------------|-------------|-------------|
| P  | 4.49973800 | 6.90885200  | 14.49227900 |
| Si | 5.15418500 | 8.80107300  | 13.35411100 |
| N  | 4.35804900 | 10.23420700 | 14.22132600 |
| N  | 7.03736100 | 9.23804700  | 13.98410700 |
| C  | 6.23084600 | 10.74533500 | 15.74050900 |
| C  | 7.92193000 | 8.87945700  | 16.19972500 |
| C  | 5.02791800 | 11.01896000 | 15.08621600 |
| H  | 4.55560500 | 11.96700000 | 15.34604100 |
| C  | 7.08463700 | 9.66241400  | 15.36324800 |
| C  | 8.80129300 | 7.88349800  | 15.64326300 |
| C  | 6.57695500 | 11.64024700 | 16.87444500 |
| C  | 7.88552400 | 12.11459900 | 17.07335700 |
| H  | 8.67530100 | 11.80598100 | 16.38711200 |
| C  | 6.12128600 | 5.77922400  | 12.52676400 |
| H  | 5.15615500 | 5.59642500  | 12.02675200 |
| H  | 6.44470300 | 6.78398700  | 12.21880200 |
| C  | 5.93325500 | 5.71926400  | 14.06610700 |
| C  | 7.27672400 | 5.94623300  | 14.76575600 |
| C  | 4.16581600 | 6.92866400  | 16.38081900 |
| C  | 8.19335800 | 12.95547500 | 18.14027800 |
| H  | 9.22159900 | 13.30634400 | 18.26621300 |
| C  | 7.21350400 | 13.36540100 | 19.05730500 |
| C  | 7.81807700 | 8.93193600  | 17.62907400 |
| H  | 7.11822900 | 9.63052200  | 18.08033200 |
| C  | 3.03660400 | 10.72984100 | 13.70096600 |
| C  | 7.87092500 | 10.04301500 | 12.96100000 |
| C  | 8.32828300 | 4.97253600  | 14.26947300 |
| H  | 9.29071500 | 5.16161800  | 14.76698000 |
| C  | 7.16894800 | 4.75765300  | 12.05687000 |
| H  | 7.28274100 | 4.84245000  | 10.96251000 |
| C  | 5.31164500 | 6.53422300  | 17.32790600 |
| H  | 5.65442200 | 5.51369700  | 17.10659800 |
| H  | 6.16529400 | 7.20271200  | 17.18337200 |
| C  | 2.98804300 | 5.94589300  | 16.61226400 |
| H  | 2.15257600 | 6.20774500  | 15.94292100 |
| H  | 3.29532700 | 4.92230900  | 16.34397800 |
| C  | 2.52340700 | 5.98693400  | 18.08044400 |

|   |             |             |             |
|---|-------------|-------------|-------------|
| H | 1.69198100  | 5.27415500  | 18.21446000 |
| C | 3.69018200  | 8.34473900  | 16.76281900 |
| H | 4.51432400  | 9.05486000  | 16.62569500 |
| H | 2.87750700  | 8.65963800  | 16.08980500 |
| C | 9.59508200  | 7.08811700  | 16.50669600 |
| H | 10.32609700 | 6.40472400  | 16.07174700 |
| C | 7.87054800  | 3.53303600  | 14.63131500 |
| H | 8.63287300  | 2.79966900  | 14.31047800 |
| H | 7.77005100  | 3.44288800  | 15.72529700 |
| C | 5.59583700  | 12.04545300 | 17.79970300 |
| H | 4.57878700  | 11.65922000 | 17.70108400 |
| C | 8.50784300  | 5.06046900  | 12.74506200 |
| H | 9.27990800  | 4.34663700  | 12.41000900 |
| H | 8.85761300  | 6.06823900  | 12.46508400 |
| C | 6.52800300  | 3.24011800  | 13.94328100 |
| H | 6.18594500  | 2.22586300  | 14.21213000 |
| C | 8.55125700  | 8.10111000  | 18.44046100 |
| H | 8.43129100  | 8.15928200  | 19.52453800 |
| C | 5.47594100  | 4.26338200  | 14.40377200 |
| H | 5.31574800  | 4.16588200  | 15.48797500 |
| H | 4.50493800  | 4.06865700  | 13.91504000 |
| C | 7.56428900  | 14.26935400 | 20.22658800 |
| H | 8.63683800  | 14.51202300 | 20.13300600 |
| C | 3.20836900  | 8.39423800  | 18.22187300 |
| H | 2.87220300  | 9.42033200  | 18.45324300 |
| C | 4.84929300  | 6.59138400  | 18.79686200 |
| H | 5.70020600  | 6.31661000  | 19.44315100 |
| C | 3.69145900  | 5.60185200  | 19.00433800 |
| H | 3.36223000  | 5.61144000  | 20.05781700 |
| H | 4.02734700  | 4.57484700  | 18.78027600 |
| C | 9.45973300  | 7.16516900  | 17.87514400 |
| H | 10.06547700 | 6.53006500  | 18.52586000 |
| C | 2.04647900  | 7.40850400  | 18.42168700 |
| H | 1.68558800  | 7.45031700  | 19.46384100 |
| H | 1.19750300  | 7.68723100  | 17.77389200 |
| C | 6.70629000  | 3.33854300  | 12.42009400 |
| H | 5.75447100  | 3.11059400  | 11.91102000 |
| H | 7.44555400  | 2.59548100  | 12.07423700 |
| C | 2.22672500  | 11.41874500 | 14.81325900 |
| H | 2.16358300  | 10.77956800 | 15.70582100 |
| H | 1.20527900  | 11.60520600 | 14.45036600 |
| H | 2.64403100  | 12.39125900 | 15.10998300 |
| C | 5.90709000  | 12.89393900 | 18.86219100 |
| H | 5.11647800  | 13.17622800 | 19.56223300 |

|   |            |             |             |
|---|------------|-------------|-------------|
| C | 4.37646800 | 8.01208900  | 19.14425400 |
| H | 4.06232500 | 8.06162700  | 20.20123100 |
| H | 5.20361100 | 8.72901100  | 19.01845900 |
| C | 8.12669400 | 9.11042400  | 11.77565600 |
| H | 8.69294900 | 8.21814100  | 12.08380900 |
| H | 8.71645400 | 9.63742300  | 11.01183600 |
| H | 7.18013600 | 8.78390000  | 11.32074600 |
| C | 2.22070600 | 9.52964100  | 13.19793000 |
| H | 2.75417200 | 8.98143100  | 12.40508600 |
| H | 1.26819500 | 9.88122300  | 12.77499400 |
| H | 2.00436800 | 8.82103500  | 14.00918400 |
| C | 9.20027000 | 10.49993500 | 13.57037400 |
| H | 9.03758400 | 11.15771900 | 14.43331500 |
| H | 9.75475700 | 11.07044100 | 12.81071500 |
| H | 9.83203700 | 9.66177300  | 13.88928800 |
| C | 7.08367900 | 11.27666800 | 12.51297300 |
| H | 6.12086900 | 10.99177600 | 12.06797000 |
| H | 7.66430500 | 11.81682000 | 11.75092100 |
| H | 6.90129800 | 11.95815400 | 13.35400500 |
| C | 3.28111900 | 11.71156400 | 12.54350300 |
| H | 3.90797900 | 12.55474000 | 12.87233000 |
| H | 2.32834200 | 12.11732500 | 12.16881200 |
| H | 3.79097700 | 11.20394800 | 11.71105700 |
| C | 7.36830900 | 13.55273200 | 21.57154500 |
| H | 6.30963200 | 13.29049500 | 21.73074700 |
| H | 7.68285200 | 14.19599500 | 22.40941800 |
| H | 7.95297500 | 12.62094000 | 21.61411300 |
| C | 6.78483400 | 15.59201400 | 20.18160400 |
| H | 6.94741100 | 16.11778800 | 19.22811700 |
| H | 7.09748800 | 16.25953500 | 21.00091600 |
| H | 5.70139900 | 15.41982000 | 20.28823100 |
| H | 7.38917800 | 8.25766400  | 13.98500400 |
| H | 7.19851900 | 5.94887700  | 15.84910300 |
| H | 9.10267400 | 7.92010200  | 14.60265700 |

### 3c\_Int3

|    |            |             |             |
|----|------------|-------------|-------------|
| P  | 4.65401400 | 6.93717700  | 14.51953400 |
| Si | 4.89544000 | 8.86466800  | 13.23784700 |
| N  | 4.17580500 | 10.24251900 | 14.27430100 |
| N  | 6.80653100 | 9.36952800  | 13.72646000 |
| C  | 6.14735100 | 10.63855600 | 15.70215700 |
| C  | 7.55254300 | 8.52256100  | 15.85929400 |
| C  | 4.90839700 | 10.94878700 | 15.16677100 |
| H  | 4.45192900 | 11.86885600 | 15.53243900 |

|   |             |             |             |
|---|-------------|-------------|-------------|
| C | 6.89445500  | 9.50440300  | 15.16783000 |
| C | 8.30098400  | 7.37912700  | 15.17972900 |
| H | 8.54378700  | 7.64911600  | 14.14089500 |
| C | 6.66419600  | 11.45037100 | 16.82623700 |
| C | 8.04463200  | 11.61526400 | 17.05606900 |
| H | 8.75911500  | 11.10128100 | 16.41347400 |
| C | 6.60109000  | 5.96165300  | 12.75744300 |
| H | 5.68729100  | 5.86678600  | 12.14902200 |
| H | 7.01879300  | 6.94888700  | 12.50820300 |
| C | 6.22650600  | 5.85116000  | 14.25882100 |
| C | 7.53354200  | 5.99485200  | 15.13583200 |
| H | 7.26439500  | 5.77968800  | 16.17661200 |
| C | 4.09659900  | 6.95986500  | 16.37303600 |
| C | 8.51943600  | 12.39649200 | 18.10754800 |
| H | 9.59941900  | 12.49709600 | 18.25000000 |
| C | 7.64933100  | 13.05267700 | 18.98917000 |
| C | 7.61428600  | 8.54818900  | 17.31107600 |
| H | 6.84495300  | 9.08782800  | 17.86115800 |
| C | 2.82079100  | 10.75311600 | 13.87964700 |
| C | 7.54981400  | 10.37121000 | 12.82877000 |
| C | 8.52562000  | 4.87580800  | 14.68805400 |
| H | 9.43103700  | 4.95413900  | 15.30316900 |
| C | 7.62577400  | 4.88754500  | 12.34775700 |
| H | 7.87422500  | 5.02419000  | 11.28160700 |
| C | 5.04657400  | 6.30053000  | 17.39259100 |
| H | 5.26416400  | 5.26243000  | 17.10526900 |
| H | 6.00025800  | 6.83676000  | 17.42412800 |
| C | 2.76276600  | 6.16565300  | 16.38424900 |
| H | 2.06441900  | 6.61084200  | 15.65694200 |
| H | 2.94375600  | 5.13297600  | 16.04406500 |
| C | 2.13301800  | 6.15937400  | 17.78931800 |
| H | 1.18961900  | 5.58800700  | 17.75820300 |
| C | 3.79955800  | 8.39145900  | 16.85316300 |
| H | 4.72254400  | 8.98095100  | 16.86045200 |
| H | 3.12035000  | 8.88425400  | 16.14649000 |
| C | 9.63805700  | 7.20186500  | 15.88190900 |
| H | 10.48692700 | 6.84008500  | 15.29804100 |
| C | 7.92983600  | 3.48012900  | 14.91145200 |
| H | 8.68094800  | 2.71262500  | 14.65603400 |
| H | 7.67943300  | 3.34480900  | 15.97715300 |
| C | 5.79267800  | 12.08754400 | 17.73542000 |
| H | 4.71521600  | 11.93544200 | 17.64446700 |
| C | 8.89326200  | 5.03432200  | 13.20325200 |
| H | 9.63232700  | 4.26633000  | 12.91842300 |

|   |             |             |             |
|---|-------------|-------------|-------------|
| H | 9.37279900  | 6.00955700  | 13.01398700 |
| C | 6.67661500  | 3.31972300  | 14.04980000 |
| H | 6.22290300  | 2.32802700  | 14.21606200 |
| C | 8.66183900  | 7.98875000  | 17.96890000 |
| H | 8.72300600  | 8.03480600  | 19.05828800 |
| C | 5.67308100  | 4.40337500  | 14.45466500 |
| H | 5.37757700  | 4.25422000  | 15.50258400 |
| H | 4.75421200  | 4.31185800  | 13.85624500 |
| C | 8.17829900  | 13.89338100 | 20.13818200 |
| H | 9.27950100  | 13.88104900 | 20.06300500 |
| C | 3.16866500  | 8.39341700  | 18.25578800 |
| H | 2.97489100  | 9.43772200  | 18.55700800 |
| C | 4.42069200  | 6.29701500  | 18.80205700 |
| H | 5.13236900  | 5.82391500  | 19.49999200 |
| C | 3.10572600  | 5.50209500  | 18.78194100 |
| H | 2.66081800  | 5.47366900  | 19.79161900 |
| H | 3.29949200  | 4.45709300  | 18.48484000 |
| C | 9.76597400  | 7.43054900  | 17.20445100 |
| H | 10.71689300 | 7.23701400  | 17.70888100 |
| C | 1.84966600  | 7.60520500  | 18.22934700 |
| H | 1.37652400  | 7.61544500  | 19.22643800 |
| H | 1.13993100  | 8.08004800  | 17.52990000 |
| C | 7.03009900  | 3.48842000  | 12.56528400 |
| H | 6.12688500  | 3.36073900  | 11.94537900 |
| H | 7.75290700  | 2.71640500  | 12.25007100 |
| C | 2.14346400  | 11.52634800 | 15.02362200 |
| H | 2.15319300  | 10.94626400 | 15.95845400 |
| H | 1.09503400  | 11.71792300 | 14.75175100 |
| H | 2.60825400  | 12.50440900 | 15.21401700 |
| C | 6.27336200  | 12.87618100 | 18.77912900 |
| H | 5.55532500  | 13.34440500 | 19.45784300 |
| C | 4.14106500  | 7.74042700  | 19.24957700 |
| H | 3.71423300  | 7.74832400  | 20.26738300 |
| H | 5.08154500  | 8.31457800  | 19.29007100 |
| C | 8.89231200  | 10.73176400 | 13.46914100 |
| H | 8.75219800  | 11.33873200 | 14.37163100 |
| H | 9.48861900  | 11.31786000 | 12.75361500 |
| H | 9.46909200  | 9.83595400  | 13.74343600 |
| C | 1.93435700  | 9.54141200  | 13.54395400 |
| H | 2.38340000  | 8.92012400  | 12.75190800 |
| H | 0.95198300  | 9.87934600  | 13.18180400 |
| H | 1.77972500  | 8.90633400  | 14.42784000 |
| C | 6.72157100  | 11.63225900 | 12.58656600 |
| H | 5.74892700  | 11.38647400 | 12.14139000 |

|   |            |             |             |
|---|------------|-------------|-------------|
| H | 7.26383000 | 12.28389000 | 11.88507400 |
| H | 6.55676200 | 12.18775600 | 13.51741300 |
| C | 7.77896400 | 9.63561100  | 11.50193500 |
| H | 8.43312300 | 8.75872800  | 11.63883200 |
| H | 8.26976000 | 10.30829100 | 10.78393200 |
| H | 6.82525600 | 9.29659500  | 11.07107900 |
| C | 2.94501800 | 11.66496100 | 12.64747100 |
| H | 3.59768900 | 12.52371800 | 12.86778600 |
| H | 1.95939100 | 12.05169300 | 12.34384100 |
| H | 3.37430300 | 11.10994600 | 11.79973100 |
| C | 7.80215400 | 13.29209900 | 21.50122200 |
| H | 6.70899100 | 13.28311700 | 21.64255000 |
| H | 8.24060800 | 13.87799000 | 22.32563800 |
| H | 8.15790400 | 12.25395000 | 21.58872600 |
| C | 7.72404800 | 15.35689500 | 20.03251800 |
| H | 8.02019500 | 15.79635200 | 19.06750800 |
| H | 8.16520300 | 15.96555600 | 20.83872800 |
| H | 6.62797000 | 15.43979100 | 20.11485000 |
| H | 7.23845500 | 8.47435400  | 13.50343700 |

### 3c\_TS4

|    |             |             |             |
|----|-------------|-------------|-------------|
| P  | 4.33740400  | 6.64840200  | 14.31000300 |
| Si | 4.87762200  | 8.80726000  | 14.44560800 |
| N  | 3.93476900  | 10.28487000 | 14.55178100 |
| N  | 6.47450900  | 9.33777800  | 13.70838500 |
| C  | 5.88556500  | 10.79366200 | 15.85789700 |
| C  | 7.33097100  | 8.58502700  | 16.05735600 |
| C  | 4.65732600  | 11.15759000 | 15.37772600 |
| H  | 4.23817800  | 12.15055600 | 15.54530600 |
| C  | 6.33069500  | 9.43382800  | 15.40577600 |
| C  | 8.04103400  | 7.47014900  | 15.30214500 |
| H  | 8.27820800  | 7.78079400  | 14.26662800 |
| C  | 6.72126700  | 11.69842400 | 16.66865200 |
| C  | 8.12584600  | 11.64272200 | 16.59900200 |
| H  | 8.59879800  | 10.86245000 | 16.00191300 |
| C  | 6.51171800  | 5.96511500  | 12.72326600 |
| H  | 5.64424300  | 5.80073200  | 12.06179200 |
| H  | 6.85405900  | 6.99205000  | 12.52623600 |
| C  | 6.07899500  | 5.79195600  | 14.20278900 |
| C  | 7.31761600  | 6.03643200  | 15.16198500 |
| H  | 7.01509800  | 5.78254400  | 16.18422500 |
| C  | 3.62951200  | 6.47120600  | 16.09661900 |
| C  | 8.91230900  | 12.53993700 | 17.32034300 |
| H  | 10.00122600 | 12.46659100 | 17.25101800 |



|   |             |             |             |
|---|-------------|-------------|-------------|
| C | 8.34288600  | 13.52108700 | 18.14292500 |
| C | 7.45849000  | 8.64855500  | 17.45203700 |
| H | 6.77969900  | 9.30148500  | 18.01104400 |
| C | 2.64462100  | 10.68861700 | 13.94691900 |
| C | 6.97579000  | 10.28858100 | 12.65814000 |
| C | 8.40034500  | 4.99323100  | 14.74380100 |
| H | 9.25609400  | 5.15418000  | 15.41016600 |
| C | 7.63837300  | 4.98294800  | 12.35610900 |
| H | 7.92950800  | 5.15736500  | 11.30603500 |
| C | 4.67955600  | 6.37187100  | 17.21699700 |
| H | 5.31614500  | 5.49256900  | 17.05725700 |
| H | 5.34839300  | 7.24372400  | 17.20830400 |
| C | 2.73627600  | 5.20455600  | 16.11964400 |
| H | 1.97276900  | 5.27354300  | 15.32699100 |
| H | 3.33548700  | 4.30850100  | 15.90561600 |
| C | 2.05958700  | 5.05127200  | 17.49593400 |
| H | 1.44844200  | 4.13323700  | 17.48897700 |
| C | 2.71755600  | 7.68408700  | 16.38941800 |
| H | 3.30972600  | 8.61248000  | 16.40427500 |
| H | 1.95958400  | 7.78827400  | 15.59573300 |
| C | 9.39320500  | 7.33325300  | 15.98088000 |
| H | 10.26182200 | 7.07906600  | 15.36802900 |
| C | 7.91699700  | 3.54997400  | 14.90967400 |
| H | 8.73701400  | 2.84956900  | 14.67328100 |
| H | 7.62700100  | 3.36570400  | 15.95774200 |
| C | 6.14861900  | 12.67138900 | 17.51022500 |
| H | 5.06282100  | 12.70943200 | 17.62793000 |
| C | 8.83720200  | 5.21082700  | 13.28631800 |
| H | 9.64999200  | 4.51009000  | 13.02966600 |
| H | 9.24430800  | 6.22519700  | 13.14748900 |
| C | 6.72487300  | 3.31160100  | 13.98232100 |
| H | 6.33470600  | 2.28693800  | 14.10558400 |
| C | 8.46407300  | 7.96986900  | 18.14169800 |
| H | 8.55039000  | 8.03782000  | 19.22715000 |
| C | 5.62452400  | 4.30428400  | 14.36895000 |
| H | 5.33655300  | 4.12551700  | 15.41427600 |
| H | 4.73027000  | 4.12133500  | 13.74973200 |
| C | 9.21390000  | 14.47577700 | 18.94123400 |
| H | 10.26080700 | 14.25353100 | 18.67211500 |
| C | 2.02431200  | 7.54044500  | 17.75490700 |
| H | 1.38798800  | 8.42627800  | 17.92149300 |
| C | 3.99059400  | 6.23113100  | 18.58641700 |
| H | 4.77202600  | 6.16661500  | 19.36054600 |
| C | 3.13276900  | 4.95503500  | 18.59442600 |

|   |             |             |             |
|---|-------------|-------------|-------------|
| H | 2.65287400  | 4.82093400  | 19.57878100 |
| H | 3.77060800  | 4.07103800  | 18.42442300 |
| C | 9.51237500  | 7.43643000  | 17.34263800 |
| H | 10.47402500 | 7.19421200  | 17.81051400 |
| C | 1.16224500  | 6.26932100  | 17.76350600 |
| H | 0.65350300  | 6.16301500  | 18.73644900 |
| H | 0.37509700  | 6.33828800  | 16.99301300 |
| C | 7.13300700  | 3.54096500  | 12.51981400 |
| H | 6.27267500  | 3.36030700  | 11.85243600 |
| H | 7.92361500  | 2.82894000  | 12.22914500 |
| C | 1.61324600  | 10.97631200 | 15.05131600 |
| H | 1.44910200  | 10.08675500 | 15.67468000 |
| H | 0.64964200  | 11.27513000 | 14.61139500 |
| H | 1.94931800  | 11.79318600 | 15.70738800 |
| C | 6.94188200  | 13.56724100 | 18.22356600 |
| H | 6.45813900  | 14.30399200 | 18.87033900 |
| C | 3.09957800  | 7.45468900  | 18.84979900 |
| H | 2.62479000  | 7.37804900  | 19.84257700 |
| H | 3.71213000  | 8.37187400  | 18.85185700 |
| C | 8.48573000  | 10.04185500 | 12.52782900 |
| H | 8.99013700  | 10.21082400 | 13.49050600 |
| H | 8.92006300  | 10.72172800 | 11.78006600 |
| H | 8.69713100  | 9.00927100  | 12.20704700 |
| C | 2.15095200  | 9.54111000  | 13.05859900 |
| H | 2.87827300  | 9.31562700  | 12.26205300 |
| H | 1.20059200  | 9.81464400  | 12.57790200 |
| H | 1.98554300  | 8.61940500  | 13.63380700 |
| C | 6.73212100  | 11.75577000 | 13.01153600 |
| H | 5.66604000  | 11.97790500 | 13.12579500 |
| H | 7.12367000  | 12.37692400 | 12.19167500 |
| H | 7.24965600  | 12.04179000 | 13.93543100 |
| C | 6.24983300  | 9.92513600  | 11.35625900 |
| H | 6.42244800  | 8.87251600  | 11.08407600 |
| H | 6.60484300  | 10.55564100 | 10.52689200 |
| H | 5.16478500  | 10.07921900 | 11.46168400 |
| C | 2.83596800  | 11.94065800 | 13.07209800 |
| H | 3.21586100  | 12.79197400 | 13.65580300 |
| H | 1.87733400  | 12.24435200 | 12.62487300 |
| H | 3.54645500  | 11.74118400 | 12.25654900 |
| C | 9.06648500  | 14.24231000 | 20.45275200 |
| H | 8.03875900  | 14.45742400 | 20.78844700 |
| H | 9.74799100  | 14.89669100 | 21.02067400 |
| H | 9.29154400  | 13.19751900 | 20.71588000 |
| C | 8.94349300  | 15.94263200 | 18.57524700 |

|           |            |             |             |
|-----------|------------|-------------|-------------|
| H         | 9.07687100 | 16.11472300 | 17.49594500 |
| H         | 9.62719200 | 16.61530500 | 19.11839400 |
| H         | 7.91325700 | 16.23555000 | 18.83582800 |
| H         | 7.06527700 | 8.50596900  | 13.65868700 |
| <b>3c</b> |            |             |             |
| P         | 4.69825600 | 6.98472200  | 14.51998800 |
| Si        | 5.54550000 | 9.07049000  | 14.18521600 |
| N         | 4.43601500 | 10.44948400 | 14.52075200 |
| N         | 6.15284200 | 9.02502100  | 12.56735600 |
| H         | 5.78881900 | 8.27646100  | 11.98516900 |
| C         | 6.04834600 | 10.69515300 | 16.26540600 |
| C         | 7.67479400 | 8.71410000  | 16.02190700 |
| C         | 4.91495500 | 11.13548900 | 15.61672300 |
| H         | 4.39258100 | 12.03785000 | 15.94071100 |
| C         | 6.65750300 | 9.53641100  | 15.61746600 |
| C         | 8.21530300 | 7.63604600  | 15.07806600 |
| H         | 7.96945800 | 7.92783800  | 14.05041900 |
| C         | 6.59339400 | 11.46001700 | 17.40936600 |
| C         | 7.93963400 | 11.86665100 | 17.44378300 |
| H         | 8.60177800 | 11.58357100 | 16.62367800 |
| C         | 6.63801700 | 5.72019600  | 12.99366700 |
| H         | 5.71783000 | 5.50645000  | 12.42491000 |
| H         | 7.03750600 | 6.66769600  | 12.60985600 |
| C         | 6.27957500 | 5.86423300  | 14.49670600 |
| C         | 7.58312700 | 6.20192700  | 15.31123200 |
| H         | 7.34172900 | 6.14645400  | 16.38080600 |
| C         | 3.94887100 | 6.98516600  | 16.29043300 |
| C         | 8.43451400 | 12.61774700 | 18.50791500 |
| H         | 9.48604300 | 12.91940000 | 18.50765400 |
| C         | 7.61376600 | 13.00165200 | 19.57966900 |
| C         | 8.31951600 | 8.80094500  | 17.32536200 |
| H         | 7.76640800 | 9.23746000  | 18.15680800 |
| C         | 3.28169000 | 10.97493000 | 13.75567700 |
| C         | 7.09408900 | 9.89506200  | 11.84021500 |
| C         | 8.61191800 | 5.06302500  | 15.03803200 |
| H         | 9.52625700 | 5.29256600  | 15.60134500 |
| C         | 7.67042200 | 4.60623700  | 12.75959300 |
| H         | 7.89513800 | 4.55067800  | 11.68083800 |
| C         | 4.94993700 | 6.97479200  | 17.46234800 |
| H         | 5.58716600 | 6.08060100  | 17.41504800 |
| H         | 5.61449900 | 7.84495000  | 17.39477900 |
| C         | 3.00777400 | 5.75639000  | 16.41300700 |
| H         | 2.27900300 | 5.77404900  | 15.58600800 |

|   |             |             |             |
|---|-------------|-------------|-------------|
| H | 3.57083300  | 4.82011300  | 16.31575100 |
| C | 2.27441400  | 5.76051800  | 17.76759400 |
| H | 1.63585000  | 4.86300400  | 17.82789700 |
| C | 3.06185500  | 8.24159300  | 16.42768400 |
| H | 3.67724700  | 9.14282300  | 16.36564500 |
| H | 2.34180500  | 8.27651300  | 15.59349100 |
| C | 9.73137600  | 7.62092600  | 15.19046000 |
| H | 10.31032800 | 7.29312500  | 14.32485600 |
| C | 8.06642800  | 3.71324900  | 15.52570000 |
| H | 8.83251300  | 2.93061200  | 15.38911500 |
| H | 7.84491200  | 3.76262800  | 16.60526800 |
| C | 5.77032600  | 11.84454600 | 18.48298000 |
| H | 4.72540900  | 11.52453300 | 18.49080900 |
| C | 8.94433300  | 4.94742800  | 13.54049400 |
| H | 9.70843400  | 4.16549600  | 13.39038600 |
| H | 9.37209300  | 5.88465800  | 13.15389700 |
| C | 6.79703300  | 3.36486300  | 14.74239200 |
| H | 6.37744700  | 2.41098500  | 15.10439800 |
| C | 9.60147600  | 8.39109500  | 17.49433300 |
| H | 10.09010400 | 8.46831800  | 18.46873900 |
| C | 5.76861400  | 4.47802800  | 14.97521200 |
| H | 5.53318500  | 4.51883300  | 16.04686600 |
| H | 4.83150100  | 4.24015500  | 14.44565800 |
| C | 8.16966100  | 13.80992700 | 20.74009000 |
| H | 9.23141600  | 14.00775500 | 20.51252200 |
| C | 2.31267500  | 8.25751300  | 17.77062700 |
| H | 1.70310200  | 9.17599200  | 17.82244600 |
| C | 4.20361300  | 6.98434600  | 18.81021400 |
| H | 4.94627200  | 6.97395100  | 19.62563500 |
| C | 3.30540700  | 5.74051100  | 18.90924900 |
| H | 2.79035500  | 5.71793000  | 19.88491600 |
| H | 3.91959200  | 4.82549700  | 18.84844800 |
| C | 10.36165100 | 7.93436300  | 16.33871400 |
| H | 11.45067500 | 7.86349700  | 16.41041100 |
| C | 1.40760300  | 7.02300500  | 17.88072700 |
| H | 0.86337100  | 7.03052300  | 18.84074500 |
| H | 0.65002500  | 7.03495100  | 17.07854300 |
| C | 7.11237300  | 3.26114900  | 13.24425000 |
| H | 6.19869800  | 3.00295500  | 12.68218400 |
| H | 7.84461900  | 2.45633100  | 13.06089600 |
| C | 2.08588500  | 11.24390400 | 14.68883000 |
| H | 1.77229200  | 10.32534000 | 15.20175700 |
| H | 1.23311000  | 11.62117900 | 14.10424300 |
| H | 2.32001400  | 12.00002300 | 15.45247400 |

|   |            |             |             |
|---|------------|-------------|-------------|
| C | 6.26979400 | 12.60312400 | 19.54293800 |
| H | 5.59860200 | 12.87569700 | 20.36173500 |
| C | 3.34171100 | 8.25270600  | 18.91303000 |
| H | 2.82849500 | 8.28848100  | 19.88929600 |
| H | 3.98309400 | 9.14764100  | 18.84913600 |
| C | 8.32198900 | 9.07254400  | 11.40719700 |
| H | 8.85724100 | 8.67941900  | 12.28368500 |
| H | 9.02543100 | 9.68709500  | 10.82342900 |
| H | 8.01923100 | 8.21849100  | 10.77980100 |
| C | 2.86414800 | 9.93062100  | 12.71226100 |
| H | 3.67189000 | 9.74693300  | 11.99172800 |
| H | 1.98148200 | 10.28336900 | 12.15877400 |
| H | 2.61241900 | 8.97188000  | 13.19007600 |
| C | 7.54709500 | 11.04872700 | 12.74402800 |
| H | 6.68915800 | 11.63360900 | 13.10585400 |
| H | 8.21089000 | 11.72503500 | 12.18504300 |
| H | 8.09428000 | 10.67674200 | 13.62140600 |
| C | 6.39829300 | 10.45407900 | 10.58726000 |
| H | 6.04172700 | 9.63374100  | 9.94264400  |
| H | 7.08650100 | 11.07516000 | 9.99234400  |
| H | 5.52923800 | 11.06810300 | 10.86316200 |
| C | 3.67733500 | 12.28422700 | 13.04934000 |
| H | 3.99445400 | 13.04662000 | 13.77733400 |
| H | 2.83036000 | 12.69379700 | 12.47696100 |
| H | 4.51187100 | 12.11200200 | 12.35579300 |
| C | 8.11924700 | 13.01876800 | 22.05616500 |
| H | 7.07909500 | 12.79628500 | 22.34533800 |
| H | 8.57948000 | 13.59111800 | 22.87817200 |
| H | 8.65179700 | 12.05966400 | 21.96356500 |
| C | 7.46642100 | 15.16818300 | 20.88067700 |
| H | 7.52747300 | 15.74614800 | 19.94565000 |
| H | 7.92326300 | 15.76603700 | 21.68617800 |
| H | 6.39932000 | 15.04047600 | 21.12548800 |

---

**AdC≡P**

|   |             |             |            |
|---|-------------|-------------|------------|
| P | 19.09563900 | 12.83541800 | 3.69801600 |
| C | 17.74336400 | 12.33835700 | 3.12506700 |
| C | 16.46917700 | 11.87038900 | 2.58530800 |
| C | 16.49999200 | 11.89239800 | 1.03080100 |
| H | 17.32631500 | 11.25525000 | 0.67713700 |
| H | 16.71153100 | 12.91803200 | 0.68851000 |
| C | 15.15668600 | 11.39958000 | 0.46873500 |

|   |             |             |             |
|---|-------------|-------------|-------------|
| H | 15.20017400 | 11.42341300 | -0.63286200 |
| C | 14.89669500 | 9.96023000  | 0.94593100  |
| H | 15.69368000 | 9.29030600  | 0.58119400  |
| H | 13.94641700 | 9.58867300  | 0.52681000  |
| C | 14.84281100 | 9.92923100  | 2.48323700  |
| H | 14.66104300 | 8.89754600  | 2.82758700  |
| C | 16.18453300 | 10.41550700 | 3.05475700  |
| H | 16.17058700 | 10.38782700 | 4.15606400  |
| H | 17.00746300 | 9.76192800  | 2.72393000  |
| C | 15.30830100 | 12.78378000 | 3.07110000  |
| H | 15.50603400 | 13.81947300 | 2.75160800  |
| H | 15.28489600 | 12.78264100 | 4.17258800  |
| C | 13.97052100 | 12.28645100 | 2.49988200  |
| H | 13.16259100 | 12.94703000 | 2.85607000  |
| C | 13.71077600 | 10.84691500 | 2.97651700  |
| H | 13.65145000 | 10.81717100 | 4.07772000  |
| H | 12.74033900 | 10.49056900 | 2.59177200  |
| C | 14.02466100 | 12.31703500 | 0.96256400  |
| H | 13.05957100 | 11.98563500 | 0.54360400  |
| H | 14.19195200 | 13.34881400 | 0.60974900  |

#### 4\_TS1

|    |             |            |            |
|----|-------------|------------|------------|
| P  | 8.89639900  | 8.88826100 | 4.75621700 |
| P  | 8.00881500  | 8.19756500 | 1.37432400 |
| P  | 6.89568700  | 7.49582800 | 7.20129100 |
| Si | 8.02667100  | 6.91163200 | 3.35143400 |
| N  | 9.58904900  | 5.75652500 | 3.40831600 |
| N  | 7.77298400  | 5.24927300 | 2.32743300 |
| C  | 8.95326400  | 4.78830100 | 2.71558600 |
| C  | 10.68353300 | 5.59260900 | 4.40928400 |
| C  | 11.58086600 | 4.36610800 | 4.16635800 |
| H  | 11.07178800 | 3.41395400 | 4.34742200 |
| H  | 12.42627600 | 4.42701100 | 4.86755400 |
| H  | 11.98968700 | 4.35400700 | 3.14709800 |
| C  | 11.60848100 | 6.81516100 | 4.33598000 |
| H  | 12.08864500 | 6.87613500 | 3.34996600 |
| H  | 12.39615600 | 6.73071700 | 5.09911800 |
| H  | 11.06990700 | 7.75178100 | 4.51561400 |
| C  | 10.05271100 | 5.47739000 | 5.80694400 |
| H  | 9.45339100  | 6.36369700 | 6.05252900 |
| H  | 10.83378700 | 5.36174000 | 6.57469600 |
| H  | 9.38698400  | 4.60222400 | 5.85644400 |
| C  | 9.44846900  | 3.41406600 | 2.43180200 |
| C  | 9.02577200  | 2.33761700 | 3.22374800 |

|   |             |             |             |
|---|-------------|-------------|-------------|
| H | 8.35112000  | 2.52036800  | 4.06135500  |
| C | 9.46911300  | 1.04589400  | 2.94182800  |
| H | 9.14039600  | 0.21099800  | 3.56482400  |
| C | 10.32926900 | 0.81995900  | 1.86173700  |
| H | 10.67291300 | -0.19280100 | 1.63896200  |
| C | 10.74842400 | 1.89125100  | 1.06820500  |
| H | 11.42024500 | 1.71850700  | 0.22439700  |
| C | 10.31202100 | 3.18706600  | 1.35396200  |
| H | 10.64328900 | 4.03008400  | 0.74410400  |
| C | 6.85015000  | 4.73516400  | 1.28854100  |
| C | 6.51036400  | 3.24343100  | 1.46895600  |
| H | 7.33573600  | 2.59019800  | 1.16214500  |
| H | 5.64177900  | 2.99816100  | 0.83924400  |
| H | 6.25257500  | 3.00824000  | 2.50787600  |
| C | 7.45396400  | 4.93993000  | -0.11216600 |
| H | 7.64361700  | 6.00689600  | -0.28860900 |
| H | 6.75140300  | 4.57215700  | -0.87656800 |
| H | 8.39406600  | 4.38037100  | -0.22150400 |
| C | 5.56172800  | 5.56246700  | 1.39956400  |
| H | 5.12001200  | 5.47442000  | 2.40040600  |
| H | 4.82462600  | 5.21210300  | 0.66231100  |
| H | 5.77263000  | 6.62125200  | 1.20037500  |
| C | 6.29225400  | 6.36332500  | 6.29632400  |
| C | 5.43874700  | 5.19022500  | 6.04060000  |
| C | 4.96810400  | 4.60983600  | 7.40941000  |
| H | 5.85600200  | 4.32117000  | 7.99437900  |
| H | 4.45615100  | 5.40604100  | 7.97211400  |
| C | 4.03655900  | 3.40674500  | 7.20443400  |
| H | 3.72446300  | 3.02034400  | 8.18941000  |
| C | 4.78562000  | 2.30817600  | 6.43158200  |
| H | 5.66451000  | 1.97375100  | 7.00895300  |
| H | 4.13537700  | 1.42775100  | 6.29246700  |
| C | 5.22736900  | 2.85924200  | 5.06578700  |
| H | 5.76538900  | 2.07341100  | 4.50759400  |
| C | 6.16424000  | 4.06337000  | 5.26775900  |
| H | 6.51102100  | 4.45949000  | 4.30422200  |
| H | 7.06053700  | 3.76025800  | 5.83487300  |
| C | 4.17654300  | 5.60808400  | 5.23949200  |
| H | 3.65743300  | 6.41213200  | 5.78507900  |
| H | 4.49038900  | 6.03058300  | 4.27287600  |
| C | 3.24282400  | 4.40158600  | 5.04036300  |
| H | 2.35919400  | 4.72406200  | 4.46431400  |
| C | 2.79930200  | 3.85491000  | 6.40785200  |
| H | 2.10728800  | 3.00683900  | 6.26893400  |

|   |             |             |             |
|---|-------------|-------------|-------------|
| H | 2.25146900  | 4.63110300  | 6.96848100  |
| C | 3.98297900  | 3.29466100  | 4.27180600  |
| H | 3.31508900  | 2.43017000  | 4.11705500  |
| H | 4.27197700  | 3.65563700  | 3.27418100  |
| C | 8.16294700  | 9.36971400  | 6.08413100  |
| C | 7.99006400  | 10.49665400 | 7.04344000  |
| C | 8.71020500  | 10.19937700 | 8.38727400  |
| H | 9.77236700  | 9.98795500  | 8.18253700  |
| H | 8.28262400  | 9.29402900  | 8.84366100  |
| C | 8.57091900  | 11.39391600 | 9.34621600  |
| H | 9.08356400  | 11.15197100 | 10.29238600 |
| C | 7.08129700  | 11.66395800 | 9.62007500  |
| H | 6.97303600  | 12.50036100 | 10.33144600 |
| H | 6.61605700  | 10.77956900 | 10.08732200 |
| C | 6.36791400  | 11.99720600 | 8.29845100  |
| H | 5.29854900  | 12.18555400 | 8.49193200  |
| C | 6.49653800  | 10.80526400 | 7.33691400  |
| H | 6.01253100  | 9.91886000  | 7.77316200  |
| H | 5.97798900  | 11.01543500 | 6.38894200  |
| C | 8.63030700  | 11.77935300 | 6.43453800  |
| H | 8.14230400  | 12.00053400 | 5.47243300  |
| H | 9.69037000  | 11.57402900 | 6.21653700  |
| C | 8.49513600  | 12.97041000 | 7.39464800  |
| H | 8.95845900  | 13.85775900 | 6.93098800  |
| C | 9.20956500  | 12.64325800 | 8.71651700  |
| H | 9.13577900  | 13.49780400 | 9.41064700  |
| H | 10.28315600 | 12.46791200 | 8.53260700  |
| C | 7.00688000  | 13.24445300 | 7.66612400  |
| H | 6.49074900  | 13.49702100 | 6.72432000  |
| H | 6.89602600  | 14.11197000 | 8.33896000  |
| C | 6.96267500  | 9.76562100  | 1.71485800  |
| C | 7.68948700  | 11.04132500 | 2.18773300  |
| H | 8.44472800  | 11.34312600 | 1.44707900  |
| H | 8.22172300  | 10.84575700 | 3.12943200  |
| C | 6.69088200  | 12.19828400 | 2.38313600  |
| H | 7.24181100  | 13.08859300 | 2.73205600  |
| C | 5.64030100  | 11.79895900 | 3.43085500  |
| H | 4.93727600  | 12.63205900 | 3.60398400  |
| H | 6.13284300  | 11.58611000 | 4.39203600  |
| C | 4.88082600  | 10.55364500 | 2.94642500  |
| H | 4.13383700  | 10.25770100 | 3.70230400  |
| C | 5.87611300  | 9.39540200  | 2.75600400  |
| H | 5.33362000  | 8.49400000  | 2.42582000  |
| H | 6.33532600  | 9.15279800  | 3.72485500  |



|   |             |             |             |
|---|-------------|-------------|-------------|
| C | 6.23063700  | 10.09528800 | 0.38400100  |
| H | 6.96142300  | 10.35425000 | -0.39680900 |
| H | 5.69879700  | 9.19767800  | 0.02975800  |
| C | 5.23838100  | 11.25784900 | 0.56951600  |
| H | 4.74749100  | 11.46712800 | -0.39616900 |
| C | 4.18170000  | 10.86408400 | 1.61394200  |
| H | 3.61848800  | 9.98084800  | 1.26720200  |
| H | 3.45220700  | 11.68164000 | 1.74682500  |
| C | 5.99460700  | 12.50799000 | 1.04838200  |
| H | 6.74057600  | 12.81158100 | 0.29374500  |
| H | 5.29536400  | 13.35322800 | 1.16954100  |
| C | 9.75192600  | 8.65743200  | 0.75753400  |
| C | 10.43449300 | 7.31262500  | 0.39648500  |
| H | 10.55168200 | 6.70690800  | 1.30745800  |
| H | 9.78997800  | 6.74278700  | -0.29055900 |
| C | 11.80713900 | 7.55096200  | -0.25847200 |
| H | 12.26357600 | 6.57521300  | -0.49981300 |
| C | 12.71683900 | 8.32302500  | 0.71017200  |
| H | 12.88636200 | 7.73205400  | 1.62469900  |
| H | 13.70596600 | 8.49132600  | 0.25044100  |
| C | 12.05896600 | 9.66672500  | 1.06249500  |
| H | 12.69905200 | 10.21827600 | 1.77182800  |
| C | 10.68563000 | 9.41836700  | 1.71905300  |
| H | 10.24098000 | 10.37776900 | 2.01242500  |
| H | 10.81553000 | 8.83869100  | 2.64056300  |
| C | 9.60313000  | 9.47858000  | -0.54683500 |
| H | 8.93778100  | 8.94485100  | -1.24525100 |
| H | 9.13099300  | 10.44869500 | -0.33191400 |
| C | 10.97598600 | 9.72013300  | -1.20021900 |
| H | 10.83484100 | 10.31092600 | -2.12115600 |
| C | 11.62452000 | 8.36992200  | -1.54629100 |
| H | 10.98883100 | 7.81811900  | -2.25970900 |
| H | 12.59954800 | 8.52995400  | -2.03781400 |
| C | 11.87550000 | 10.49286000 | -0.22104400 |
| H | 12.85528100 | 10.69864500 | -0.68535700 |
| H | 11.42060400 | 11.46927500 | 0.01862800  |

#### 4\_Int1

|    |            |            |            |
|----|------------|------------|------------|
| P  | 9.34183600 | 8.69047100 | 4.90485000 |
| P  | 7.49827200 | 7.97720400 | 1.93450600 |
| P  | 6.67075100 | 8.14804100 | 6.43837200 |
| Si | 8.08391000 | 7.00711200 | 4.00792300 |
| N  | 9.09138400 | 5.48865400 | 3.87785400 |
| N  | 7.59984600 | 4.80460900 | 2.27836400 |

|   |             |            |             |
|---|-------------|------------|-------------|
| C | 8.76349100  | 4.64828200 | 2.80378000  |
| C | 10.14187900 | 5.16454100 | 4.92758000  |
| C | 10.40481600 | 3.65438300 | 5.09978500  |
| H | 9.46480500  | 3.08575600 | 5.13424200  |
| H | 10.91397400 | 3.51051500 | 6.06415600  |
| H | 11.05064600 | 3.22853200 | 4.32784400  |
| C | 11.46952000 | 5.86675000 | 4.59638400  |
| H | 11.85400700 | 5.54719700 | 3.61986500  |
| H | 12.22676600 | 5.61920900 | 5.35661100  |
| H | 11.35491000 | 6.95997400 | 4.58711800  |
| C | 9.65854300  | 5.62644500 | 6.31595600  |
| H | 9.40889200  | 6.69106500 | 6.35875700  |
| H | 10.46617600 | 5.46074700 | 7.04378200  |
| H | 8.78433800  | 5.05170800 | 6.63883100  |
| C | 9.79079400  | 3.66730600 | 2.30259400  |
| C | 9.57172300  | 2.28961500 | 2.44874100  |
| H | 8.67601900  | 1.94545900 | 2.96574900  |
| C | 10.50419100 | 1.36298400 | 1.98381100  |
| H | 10.32112200 | 0.29462000 | 2.12051000  |
| C | 11.67135200 | 1.79983700 | 1.34974600  |
| H | 12.40168900 | 1.07543500 | 0.98181800  |
| C | 11.89773100 | 3.16929100 | 1.19307500  |
| H | 12.80445300 | 3.52340200 | 0.69700200  |
| C | 10.96753100 | 4.09443000 | 1.67243500  |
| H | 11.15608700 | 5.15783100 | 1.54571200  |
| C | 7.10664100  | 4.29015600 | 0.97877600  |
| C | 6.88239000  | 2.76400300 | 0.95675800  |
| H | 7.81557900  | 2.20299200 | 0.83608000  |
| H | 6.22835700  | 2.50554500 | 0.10939900  |
| H | 6.38412200  | 2.42943500 | 1.87864600  |
| C | 8.03718300  | 4.69137900 | -0.17991500 |
| H | 8.15200700  | 5.78288000 | -0.20383100 |
| H | 7.59963900  | 4.37293000 | -1.13885600 |
| H | 9.02997200  | 4.23218500 | -0.09464500 |
| C | 5.73744100  | 4.95309600 | 0.73124400  |
| H | 4.98484000  | 4.58232500 | 1.44012800  |
| H | 5.38449600  | 4.72049200 | -0.28530800 |
| H | 5.82041000  | 6.04241600 | 0.84027400  |
| C | 6.67373400  | 6.90956100 | 5.27389300  |
| C | 5.61950400  | 5.80355400 | 5.37458800  |
| C | 4.57659700  | 6.04019500 | 6.49445100  |
| H | 5.08442800  | 6.14544100 | 7.46745100  |
| H | 4.04914100  | 6.99120600 | 6.31139400  |
| C | 3.56439100  | 4.88275200 | 6.56400600  |

|   |             |             |             |
|---|-------------|-------------|-------------|
| H | 2.83851500  | 5.09427100  | 7.36702700  |
| C | 4.30468500  | 3.57033900  | 6.86927400  |
| H | 4.81847900  | 3.64240100  | 7.84318500  |
| H | 3.58594000  | 2.73636300  | 6.94333700  |
| C | 5.32518700  | 3.29665800  | 5.75417300  |
| H | 5.87418300  | 2.36423800  | 5.97181100  |
| C | 6.33102700  | 4.45506400  | 5.68188600  |
| H | 7.08286500  | 4.25366200  | 4.90835900  |
| H | 6.85748700  | 4.54778700  | 6.64463000  |
| C | 4.84540800  | 5.64792300  | 4.04543000  |
| H | 4.29045800  | 6.57240900  | 3.84243900  |
| H | 5.56815900  | 5.50511000  | 3.23498900  |
| C | 3.85277100  | 4.47789500  | 4.10990200  |
| H | 3.33603500  | 4.39751200  | 3.13822200  |
| C | 2.82705600  | 4.74966500  | 5.22135400  |
| H | 2.08843500  | 3.93137400  | 5.27386200  |
| H | 2.26944700  | 5.67602000  | 5.00157800  |
| C | 4.60179000  | 3.17000000  | 4.40543000  |
| H | 3.89767300  | 2.32057900  | 4.42589000  |
| H | 5.33402600  | 2.97079300  | 3.60753500  |
| C | 8.19590500  | 9.11519600  | 6.09264600  |
| C | 8.39116000  | 10.32686800 | 7.00782900  |
| C | 8.52995600  | 9.84094700  | 8.47816200  |
| H | 9.40003500  | 9.16697400  | 8.54859000  |
| H | 7.64333300  | 9.25109200  | 8.76169800  |
| C | 8.69242600  | 11.03332100 | 9.43508700  |
| H | 8.78457500  | 10.65451500 | 10.46692400 |
| C | 7.45922400  | 11.94662400 | 9.32732600  |
| H | 7.55122700  | 12.79208400 | 10.03016000 |
| H | 6.55000800  | 11.38916900 | 9.60955900  |
| C | 7.33124500  | 12.46841700 | 7.88621500  |
| H | 6.44456400  | 13.11935300 | 7.80443400  |
| C | 7.16861500  | 11.28195100 | 6.92282300  |
| H | 6.24453600  | 10.73045700 | 7.15935500  |
| H | 7.06883400  | 11.64689700 | 5.88959000  |
| C | 9.65266500  | 11.14698200 | 6.65922300  |
| H | 9.58237200  | 11.50038900 | 5.61720700  |
| H | 10.54158600 | 10.49677800 | 6.70974500  |
| C | 9.82009300  | 12.33961000 | 7.61495200  |
| H | 10.72857400 | 12.89838200 | 7.33437800  |
| C | 9.95427400  | 11.82609000 | 9.05817600  |
| H | 10.09313600 | 12.67280600 | 9.75195000  |
| H | 10.84644700 | 11.18351200 | 9.14992400  |
| C | 8.59354100  | 13.26058700 | 7.51025800  |

|   |             |             |             |
|---|-------------|-------------|-------------|
| H | 8.50133900  | 13.65319400 | 6.48321900  |
| H | 8.71201500  | 14.12990300 | 8.17940800  |
| C | 6.31390200  | 9.45412900  | 2.23393800  |
| C | 6.70649400  | 10.54610100 | 3.24698200  |
| H | 7.65780100  | 11.01672400 | 2.97091800  |
| H | 6.85753700  | 10.09383500 | 4.23127700  |
| C | 5.60581500  | 11.62008600 | 3.34350700  |
| H | 5.92423900  | 12.38999200 | 4.06675600  |
| C | 4.29970200  | 10.96984600 | 3.82454100  |
| H | 3.50775400  | 11.73133200 | 3.92853100  |
| H | 4.44952700  | 10.51719100 | 4.81925300  |
| C | 3.87367000  | 9.89216500  | 2.81429600  |
| H | 2.94655000  | 9.40347900  | 3.15851900  |
| C | 4.98111300  | 8.83135500  | 2.70807100  |
| H | 4.67423300  | 8.03154500  | 2.01561700  |
| H | 5.13342800  | 8.37064200  | 3.69099600  |
| C | 6.06066600  | 10.11863600 | 0.85767700  |
| H | 6.97906400  | 10.59997000 | 0.49282100  |
| H | 5.78046200  | 9.35044100  | 0.11772200  |
| C | 4.95368900  | 11.18425100 | 0.96235500  |
| H | 4.80454100  | 11.63778800 | -0.03212700 |
| C | 3.64560100  | 10.53278200 | 1.43711100  |
| H | 3.31976300  | 9.76694900  | 0.71277700  |
| H | 2.84307400  | 11.28814800 | 1.49295900  |
| C | 5.38580800  | 12.26555100 | 1.96664100  |
| H | 6.31555600  | 12.75098800 | 1.62308300  |
| H | 4.61579500  | 13.05324500 | 2.03206100  |
| C | 9.13485000  | 8.64504100  | 1.18131100  |
| C | 10.22239600 | 7.59584800  | 1.49172400  |
| H | 10.40262400 | 7.53944900  | 2.57249900  |
| H | 9.86145400  | 6.60927800  | 1.17131100  |
| C | 11.54557500 | 7.92915900  | 0.78634400  |
| H | 12.29496800 | 7.16151400  | 1.04768500  |
| C | 12.03158600 | 9.30699600  | 1.26306900  |
| H | 12.19940200 | 9.29064900  | 2.35298100  |
| H | 12.99563800 | 9.55689600  | 0.78803400  |
| C | 10.97481700 | 10.36633500 | 0.90955500  |
| H | 11.31726400 | 11.35778600 | 1.25063000  |
| C | 9.64578900  | 10.03284900 | 1.61542100  |
| H | 8.90627800  | 10.80603400 | 1.36330100  |
| H | 9.78498400  | 10.05969300 | 2.70614900  |
| C | 8.94430500  | 8.66376600  | -0.36184800 |
| H | 8.58048900  | 7.68349300  | -0.70373200 |
| H | 8.17731300  | 9.39746900  | -0.64465400 |

|   |             |             |             |
|---|-------------|-------------|-------------|
| C | 10.26627600 | 9.00659100  | -1.07420200 |
| H | 10.08913700 | 9.01852500  | -2.16283900 |
| C | 11.32495600 | 7.94616000  | -0.73342800 |
| H | 10.99099600 | 6.95245600  | -1.07771900 |
| H | 12.27132700 | 8.16936700  | -1.25502100 |
| C | 10.75636800 | 10.38817400 | -0.61188500 |
| H | 11.69488000 | 10.65192800 | -1.12900600 |
| H | 10.01430600 | 11.16086400 | -0.87624600 |

#### 4\_TS2

|    |             |             |             |
|----|-------------|-------------|-------------|
| Si | 0.52186800  | 0.21973700  | -0.43303700 |
| P  | -1.27784000 | -0.53499800 | -1.59989500 |
| P  | -0.51334600 | -1.26886500 | 1.29966200  |
| P  | -1.43090500 | 2.45919700  | -1.00191400 |
| N  | 1.91631500  | -0.11019400 | -1.71268400 |
| N  | 2.32770900  | -0.26457100 | 0.40762200  |
| C  | 2.83817600  | -0.43772400 | -0.80563200 |
| C  | 1.95982500  | -0.10225800 | -3.19299100 |
| C  | 3.36057800  | 0.17370100  | -3.76540300 |
| H  | 3.80517500  | 1.07345800  | -3.31629900 |
| H  | 3.25954800  | 0.35290100  | -4.84635700 |
| H  | 4.05347100  | -0.66484300 | -3.63326200 |
| C  | 1.45693400  | -1.45425000 | -3.72971500 |
| H  | 2.09274300  | -2.27504100 | -3.36499400 |
| H  | 1.48265800  | -1.46311200 | -4.83053100 |
| H  | 0.42273500  | -1.64464600 | -3.40996300 |
| C  | 1.04528200  | 1.03823600  | -3.67025700 |
| H  | 0.01502600  | 0.91375600  | -3.31554800 |
| H  | 1.02459800  | 1.06074200  | -4.77013200 |
| H  | 1.41527400  | 2.00749900  | -3.30687500 |
| C  | 4.18480600  | -0.98249800 | -1.13226000 |
| C  | 5.30014100  | -0.14735800 | -1.27759500 |
| H  | 5.19233900  | 0.92707800  | -1.12179500 |
| C  | 6.53732000  | -0.68745200 | -1.62417600 |
| H  | 7.40261200  | -0.03071500 | -1.73824000 |
| C  | 6.67106300  | -2.06550700 | -1.82733600 |
| H  | 7.64151700  | -2.48658200 | -2.09964300 |
| C  | 5.56124900  | -2.90118100 | -1.68188100 |
| H  | 5.65911700  | -3.97751000 | -1.83978800 |
| C  | 4.31915100  | -2.36174500 | -1.33693800 |
| H  | 3.44709600  | -3.00977200 | -1.23182300 |
| C  | 3.00355600  | -0.48202200 | 1.71779600  |
| C  | 4.44477900  | 0.06750600  | 1.75270500  |
| H  | 5.15536400  | -0.56524900 | 1.21035800  |

|   |             |             |             |
|---|-------------|-------------|-------------|
| H | 4.77600400  | 0.10870800  | 2.80133000  |
| H | 4.49788300  | 1.08794800  | 1.34661300  |
| C | 3.03334000  | -1.97938500 | 2.06245800  |
| H | 2.01047200  | -2.36049000 | 2.15852000  |
| H | 3.55314700  | -2.13609500 | 3.02038200  |
| H | 3.56322800  | -2.55621300 | 1.29120000  |
| C | 2.21297800  | 0.26540000  | 2.79918800  |
| H | 2.28786400  | 1.35014300  | 2.66164000  |
| H | 2.62819600  | 0.02069600  | 3.78798600  |
| H | 1.15861900  | -0.03230100 | 2.78394500  |
| C | 0.09912700  | 2.04213900  | -0.35237900 |
| C | 0.96478200  | 3.20765300  | 0.15517900  |
| C | 0.69738900  | 4.53007200  | -0.61782100 |
| H | 0.89574100  | 4.36619300  | -1.69050700 |
| H | -0.36381700 | 4.80597900  | -0.53325800 |
| C | 1.56326200  | 5.68270700  | -0.08161800 |
| H | 1.33504300  | 6.59583100  | -0.65675200 |
| C | 3.05150000  | 5.33403500  | -0.23468800 |
| H | 3.29900700  | 5.18986900  | -1.30037000 |
| H | 3.67976600  | 6.16256600  | 0.13518600  |
| C | 3.34265000  | 4.04780400  | 0.55138200  |
| H | 4.40711300  | 3.77515800  | 0.44173200  |
| C | 2.47382000  | 2.90452700  | 0.00661400  |
| H | 2.70998300  | 1.98053600  | 0.53946700  |
| H | 2.70054800  | 2.72443400  | -1.05766100 |
| C | 0.65412600  | 3.49012300  | 1.65019700  |
| H | -0.41203800 | 3.75529000  | 1.73891300  |
| H | 0.79463700  | 2.57421100  | 2.23892800  |
| C | 1.53210300  | 4.62982900  | 2.19454100  |
| H | 1.29889900  | 4.78719300  | 3.26135400  |
| C | 1.24050000  | 5.91571200  | 1.40408700  |
| H | 1.84394600  | 6.75146900  | 1.79806700  |
| H | 0.18064500  | 6.19831000  | 1.52068600  |
| C | 3.01935200  | 4.26662500  | 2.03945100  |
| H | 3.65031100  | 5.07329300  | 2.45024200  |
| H | 3.25232500  | 3.35556200  | 2.61558000  |
| C | -2.15693800 | 0.93830400  | -1.60303100 |
| C | -3.56074900 | 1.04675800  | -2.21903100 |
| C | -3.43976500 | 1.77720200  | -3.58627700 |
| H | -2.75089400 | 1.20715000  | -4.23172000 |
| H | -2.98376400 | 2.76900600  | -3.43067800 |
| C | -4.81349400 | 1.92344900  | -4.26105900 |
| H | -4.68849300 | 2.44440600  | -5.22558500 |
| C | -5.74886800 | 2.73668300  | -3.35058900 |

|   |             |             |             |
|---|-------------|-------------|-------------|
| H | -6.73192000 | 2.86642300  | -3.83502100 |
| H | -5.33358800 | 3.74542700  | -3.18588800 |
| C | -5.91157400 | 2.00948500  | -2.00556100 |
| H | -6.57502400 | 2.59411900  | -1.34598500 |
| C | -4.53760400 | 1.86487800  | -1.33221400 |
| H | -4.11256700 | 2.86128300  | -1.13463800 |
| H | -4.65076000 | 1.36786500  | -0.35854800 |
| C | -4.19985700 | -0.33603800 | -2.48086600 |
| H | -4.29247800 | -0.88459600 | -1.53004600 |
| H | -3.53281700 | -0.93437400 | -3.12242900 |
| C | -5.57583800 | -0.19447100 | -3.15124500 |
| H | -5.99852500 | -1.19953300 | -3.31889000 |
| C | -5.41703300 | 0.52944800  | -4.49898400 |
| H | -6.39590900 | 0.61907400  | -5.00070600 |
| H | -4.76358800 | -0.05675000 | -5.16746900 |
| C | -6.51331400 | 0.61500700  | -2.24072700 |
| H | -6.64609400 | 0.09427700  | -1.27676300 |
| H | -7.51219000 | 0.70191300  | -2.70192100 |
| C | -2.11256500 | -0.66867000 | 2.13320200  |
| C | -3.39726100 | -0.58591500 | 1.29034900  |
| H | -3.67001100 | -1.57918800 | 0.90971200  |
| H | -3.21667200 | 0.04819100  | 0.41842800  |
| C | -4.55920400 | -0.01595600 | 2.12556700  |
| H | -5.46185700 | 0.03185100  | 1.49230800  |
| C | -4.19755200 | 1.39530900  | 2.61663700  |
| H | -5.03397000 | 1.82371400  | 3.19533800  |
| H | -4.02213600 | 2.06210700  | 1.75670900  |
| C | -2.93241500 | 1.32069800  | 3.48590000  |
| H | -2.65873800 | 2.33141500  | 3.83292700  |
| C | -1.77432300 | 0.75209600  | 2.65075400  |
| H | -0.85914400 | 0.71684800  | 3.26386600  |
| H | -1.56319700 | 1.41434100  | 1.80021200  |
| C | -2.39144000 | -1.57412200 | 3.35813100  |
| H | -2.65599000 | -2.58858300 | 3.02210100  |
| H | -1.48123200 | -1.66401900 | 3.97413200  |
| C | -3.55082000 | -1.00314100 | 4.19772700  |
| H | -3.72585300 | -1.66792000 | 5.06069700  |
| C | -3.18646800 | 0.40553300  | 4.69444300  |
| H | -2.28640600 | 0.36115500  | 5.33135300  |
| H | -4.00304500 | 0.81077000  | 5.31633500  |
| C | -4.82080200 | -0.92982000 | 3.33326500  |
| H | -5.10302700 | -1.93976500 | 2.98929100  |
| H | -5.66472400 | -0.54462800 | 3.93100900  |
| C | -0.66373200 | -3.06650100 | 0.65207400  |

|   |             |             |             |
|---|-------------|-------------|-------------|
| C | 0.44928100  | -3.24332900 | -0.41038100 |
| H | 0.25196300  | -2.59557500 | -1.27480200 |
| H | 1.41579200  | -2.93557200 | 0.01473900  |
| C | 0.52717100  | -4.70062600 | -0.89139200 |
| H | 1.32074600  | -4.78333400 | -1.65482400 |
| C | -0.82493600 | -5.09784500 | -1.50612500 |
| H | -1.05421400 | -4.44255600 | -2.36309100 |
| H | -0.78005500 | -6.13195300 | -1.88876700 |
| C | -1.92669400 | -4.97420700 | -0.43992200 |
| H | -2.89804800 | -5.25756000 | -0.87912300 |
| C | -2.01157600 | -3.51672700 | 0.05358500  |
| H | -2.79973900 | -3.44259200 | 0.81824600  |
| H | -2.29416900 | -2.85067400 | -0.77331800 |
| C | -0.33781800 | -4.02014900 | 1.83565800  |
| H | 0.61432700  | -3.73220400 | 2.30447600  |
| H | -1.10943700 | -3.93156000 | 2.61386300  |
| C | -0.25655900 | -5.48265300 | 1.35619600  |
| H | -0.02417600 | -6.12690900 | 2.22102000  |
| C | 0.85136700  | -5.61667000 | 0.29898500  |
| H | 1.82642200  | -5.33887700 | 0.73527500  |
| H | 0.93326700  | -6.66481800 | -0.03626900 |
| C | -1.60229500 | -5.89996300 | 0.74314900  |
| H | -1.55855000 | -6.95060800 | 0.40798600  |
| H | -2.40005100 | -5.83636200 | 1.50276100  |

**4**

|    |             |            |            |
|----|-------------|------------|------------|
| P  | 8.60642000  | 8.06988000 | 4.21005700 |
| P  | 8.05622000  | 8.59147500 | 2.05317000 |
| P  | 6.33351800  | 7.65425400 | 6.22018100 |
| Si | 7.62442700  | 6.06112200 | 4.17033400 |
| N  | 9.00808400  | 4.79361000 | 4.38155200 |
| N  | 7.80523500  | 5.04972300 | 2.61099700 |
| C  | 8.87143700  | 4.40516800 | 3.11678600 |
| C  | 10.12047700 | 4.66603200 | 5.34196900 |
| C  | 10.41748700 | 3.18922700 | 5.64215600 |
| H  | 9.49901200  | 2.66580000 | 5.94921000 |
| H  | 11.14444800 | 3.11919100 | 6.46558500 |
| H  | 10.84420600 | 2.67083000 | 4.77365200 |
| C  | 11.37487400 | 5.37677500 | 4.80652900 |
| H  | 11.75353800 | 4.89077300 | 3.89613500 |
| H  | 12.17512000 | 5.35019700 | 5.56220200 |
| H  | 11.14353800 | 6.42817100 | 4.57985100 |
| C  | 9.65057200  | 5.35876500 | 6.63078000 |
| H  | 9.44049900  | 6.42520000 | 6.45969700 |



|   |             |            |             |
|---|-------------|------------|-------------|
| H | 10.43361800 | 5.28533000 | 7.39965400  |
| H | 8.73193600  | 4.89340600 | 7.01488600  |
| C | 9.77406400  | 3.48747700 | 2.37766900  |
| C | 9.66924600  | 2.09849000 | 2.52904100  |
| H | 8.90428800  | 1.68379500 | 3.18793200  |
| C | 10.53713500 | 1.25412500 | 1.83464100  |
| H | 10.44824000 | 0.17178200 | 1.95081100  |
| C | 11.51831900 | 1.79203700 | 0.99623300  |
| H | 12.19884400 | 1.12955100 | 0.45663800  |
| C | 11.62833300 | 3.17784600 | 0.84977000  |
| H | 12.39508500 | 3.60235500 | 0.19808000  |
| C | 10.75649100 | 4.02619500 | 1.53463700  |
| H | 10.83581700 | 5.10877700 | 1.42411000  |
| C | 7.06067400  | 4.81827200 | 1.35039500  |
| C | 6.69564200  | 3.33157500 | 1.19997400  |
| H | 7.58324800  | 2.70662000 | 1.03600500  |
| H | 6.03375000  | 3.20375600 | 0.33013400  |
| H | 6.16503000  | 2.96211700 | 2.08973500  |
| C | 7.87438300  | 5.28885300 | 0.13429400  |
| H | 8.15448700  | 6.34354800 | 0.26328200  |
| H | 7.26370800  | 5.19606800 | -0.77702800 |
| H | 8.78002300  | 4.68368300 | -0.00616900 |
| C | 5.77616900  | 5.65100900 | 1.44096000  |
| H | 5.15770900  | 5.34877000 | 2.29713900  |
| H | 5.18533800  | 5.52551100 | 0.52192100  |
| H | 6.02711200  | 6.71380700 | 1.54922800  |
| C | 6.27364500  | 6.15942800 | 5.30205800  |
| C | 5.25562200  | 5.08499300 | 5.67267400  |
| C | 5.23028200  | 4.80623000 | 7.19902400  |
| H | 6.24063000  | 4.50190000 | 7.52168600  |
| H | 4.99505700  | 5.73735100 | 7.73775200  |
| C | 4.20265800  | 3.71854600 | 7.55323700  |
| H | 4.20964300  | 3.55198400 | 8.64389000  |
| C | 4.56682300  | 2.41130700 | 6.83017800  |
| H | 5.56276200  | 2.06437000 | 7.15578700  |
| H | 3.84669500  | 1.61604700 | 7.08943900  |
| C | 4.56539800  | 2.65481900 | 5.31235800  |
| H | 4.83666200  | 1.72321600 | 4.78561300  |
| C | 5.58913000  | 3.74811900 | 4.97090900  |
| H | 5.60632600  | 3.90752600 | 3.88305000  |
| H | 6.60325700  | 3.42750600 | 5.26563600  |
| C | 3.82529400  | 5.50262800 | 5.24343800  |
| H | 3.56799100  | 6.45221700 | 5.74123800  |
| H | 3.82109200  | 5.70662700 | 4.15957100  |

|   |             |             |            |
|---|-------------|-------------|------------|
| C | 2.79523600  | 4.41574300  | 5.59148300 |
| H | 1.79131700  | 4.74402600  | 5.27231500 |
| C | 2.80138400  | 4.17452300  | 7.11078000 |
| H | 2.05082700  | 3.41065200  | 7.37831000 |
| H | 2.52232800  | 5.10126600  | 7.63998100 |
| C | 3.16601400  | 3.11136700  | 4.86494200 |
| H | 2.42241200  | 2.32617100  | 5.08522900 |
| H | 3.15270500  | 3.27067700  | 3.77266000 |
| C | 7.55341000  | 8.67660400  | 5.56019500 |
| C | 7.91277600  | 9.95473000  | 6.34086800 |
| C | 8.40420500  | 9.60682700  | 7.77461800 |
| H | 9.28353500  | 8.94489200  | 7.69554400 |
| H | 7.62068900  | 9.03231600  | 8.29316600 |
| C | 8.75073800  | 10.87333900 | 8.57536000 |
| H | 9.09000900  | 10.58414500 | 9.58481500 |
| C | 7.50151800  | 11.76443100 | 8.68635300 |
| H | 7.73021100  | 12.66815900 | 9.27745500 |
| H | 6.69891500  | 11.22485900 | 9.21703500 |
| C | 7.02600200  | 12.15781300 | 7.27760600 |
| H | 6.12704000  | 12.79327000 | 7.35371600 |
| C | 6.68389400  | 10.88996100 | 6.48004400 |
| H | 5.86449300  | 10.33988400 | 6.96933700 |
| H | 6.32628800  | 11.15999000 | 5.47564900 |
| C | 9.04454600  | 10.75640600 | 5.66363300 |
| H | 8.74988200  | 11.01902500 | 4.63862300 |
| H | 9.94025500  | 10.12040800 | 5.58174300 |
| C | 9.38854900  | 12.03213900 | 6.44745700 |
| H | 10.19058100 | 12.57343900 | 5.91695100 |
| C | 9.86704400  | 11.64872600 | 7.85703000 |
| H | 10.13400300 | 12.55399900 | 8.42932900 |
| H | 10.77684300 | 11.02784000 | 7.79017400 |
| C | 8.14242700  | 12.92666700 | 6.55214700 |
| H | 7.80322700  | 13.22204400 | 5.54405800 |
| H | 8.38514300  | 13.85586600 | 7.09607400 |
| C | 6.66243200  | 9.88115000  | 1.94615500 |
| C | 6.99198600  | 11.33772500 | 2.32008700 |
| H | 7.79604500  | 11.72672700 | 1.67717700 |
| H | 7.35499100  | 11.38322000 | 3.35581100 |
| C | 5.74331100  | 12.22936400 | 2.16289800 |
| H | 6.00799300  | 13.26451300 | 2.43799800 |
| C | 4.62020800  | 11.72012000 | 3.08092900 |
| H | 3.72954900  | 12.36396900 | 2.98055400 |
| H | 4.93628200  | 11.77309700 | 4.13428400 |
| C | 4.27188300  | 10.27038800 | 2.70574400 |

|   |             |             |             |
|---|-------------|-------------|-------------|
| H | 3.48320100  | 9.89233300  | 3.37737000  |
| C | 5.51942800  | 9.38411000  | 2.86320000  |
| H | 5.26456700  | 8.34069600  | 2.62119400  |
| H | 5.85688900  | 9.38450200  | 3.90723900  |
| C | 6.14535200  | 9.84732000  | 0.48187100  |
| H | 6.92715200  | 10.18640300 | -0.21258800 |
| H | 5.90123500  | 8.80961800  | 0.20275100  |
| C | 4.90109000  | 10.74025000 | 0.32640900  |
| H | 4.56433000  | 10.70275900 | -0.72357900 |
| C | 3.78416900  | 10.22629700 | 1.24911300  |
| H | 3.51163900  | 9.19366800  | 0.97160800  |
| H | 2.87727000  | 10.84373400 | 1.12970200  |
| C | 5.26371700  | 12.18684900 | 0.70264900  |
| H | 6.05427100  | 12.56493000 | 0.03145600  |
| H | 4.38775200  | 12.84487000 | 0.57178800  |
| C | 9.72304700  | 9.32301900  | 1.48392300  |
| C | 10.67335000 | 8.09660800  | 1.42252500  |
| H | 10.77730200 | 7.66282300  | 2.43041700  |
| H | 10.22572500 | 7.32077100  | 0.77952000  |
| C | 12.05474500 | 8.49521700  | 0.87808900  |
| H | 12.70363900 | 7.60261500  | 0.85389600  |
| C | 12.67615500 | 9.56367100  | 1.79206200  |
| H | 12.80818900 | 9.15894700  | 2.80978300  |
| H | 13.67693700 | 9.84533500  | 1.42205400  |
| C | 11.75643600 | 10.79472000 | 1.83202800  |
| H | 12.19411600 | 11.56260500 | 2.49188200  |
| C | 10.37797500 | 10.38679700 | 2.38559800  |
| H | 9.73474700  | 11.27419500 | 2.46337300  |
| H | 10.49349600 | 9.98028300  | 3.39932000  |
| C | 9.59150300  | 9.89056900  | 0.05269500  |
| H | 9.12124800  | 9.14262000  | -0.60800100 |
| H | 8.93779900  | 10.77542400 | 0.05504300  |
| C | 10.97346200 | 10.29019500 | -0.49909500 |
| H | 10.84728300 | 10.69522200 | -1.51733800 |
| C | 11.89311300 | 9.05915200  | -0.54287300 |
| H | 11.46470600 | 8.29029900  | -1.20872700 |
| H | 12.87719300 | 9.33511100  | -0.95882500 |
| C | 11.59436900 | 11.36229300 | 0.41225000  |
| H | 12.57310700 | 11.67904400 | 0.01290200  |
| H | 10.95043600 | 12.25812800 | 0.43459300  |

V. Collected  $^1\text{H}$ ,  $^{13}\text{C}$ ,  $^{29}\text{Si}$ ,  $^{31}\text{P}$  and  $^{19}\text{F}$  NMR spectra of compounds 1, 2, 3a-d and 4

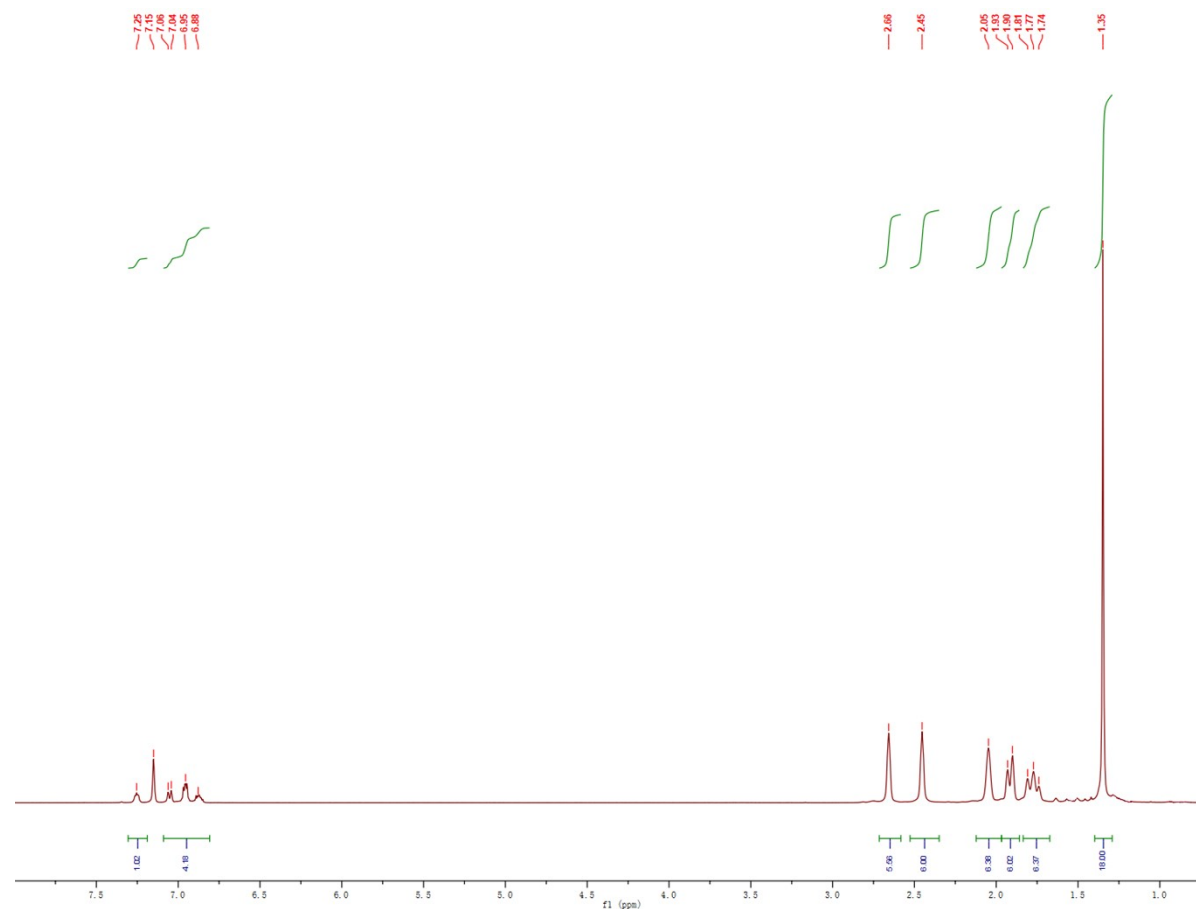

Fig. S10  $^1\text{H}$  NMR spectrum of 1 in  $\text{C}_6\text{D}_6$

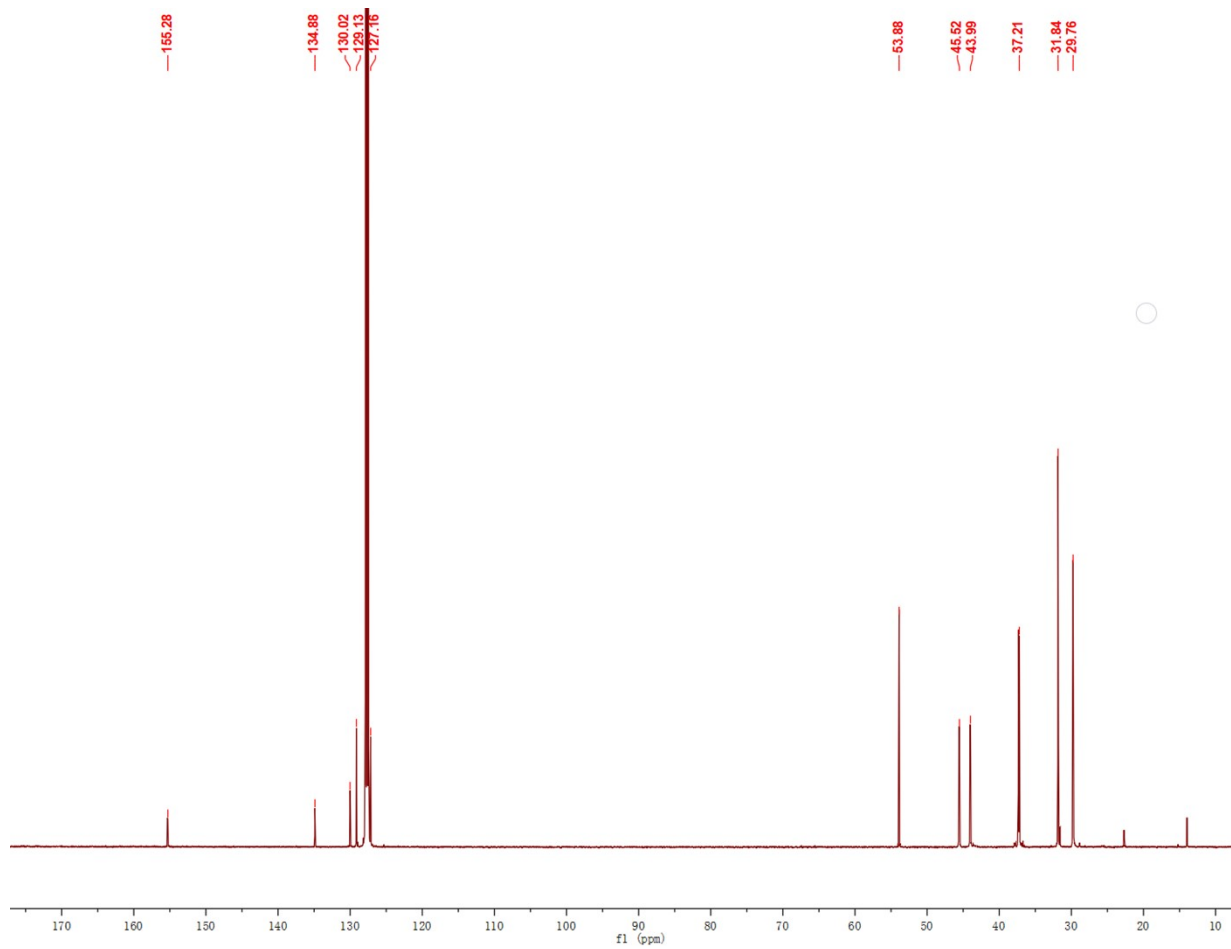

**Fig. S11**  $^{13}\text{C}$  NMR spectrum of **1** in  $\text{C}_6\text{D}_6$

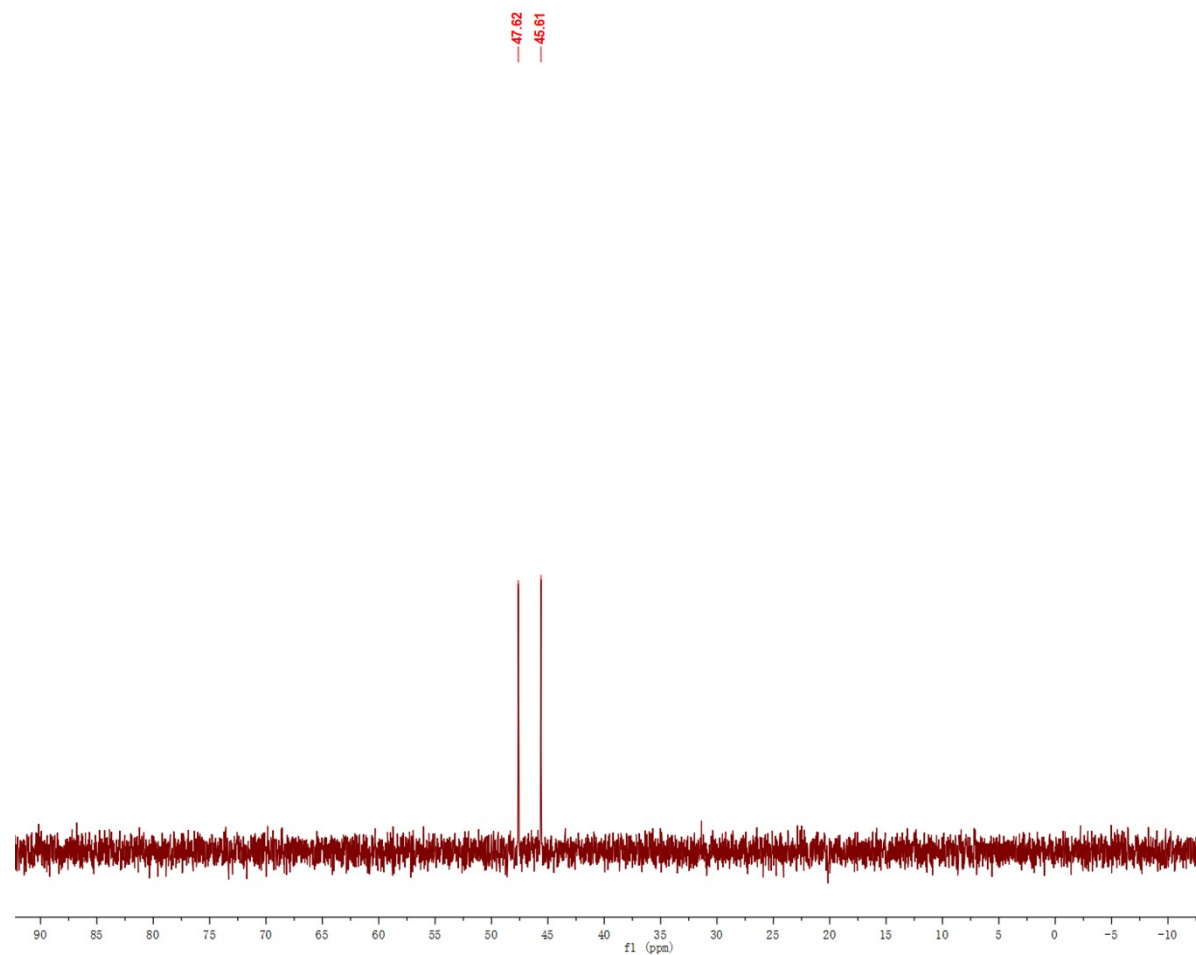

**Fig. S12**  $^{29}\text{Si}$  NMR spectrum of **1** in  $\text{C}_6\text{D}_6$

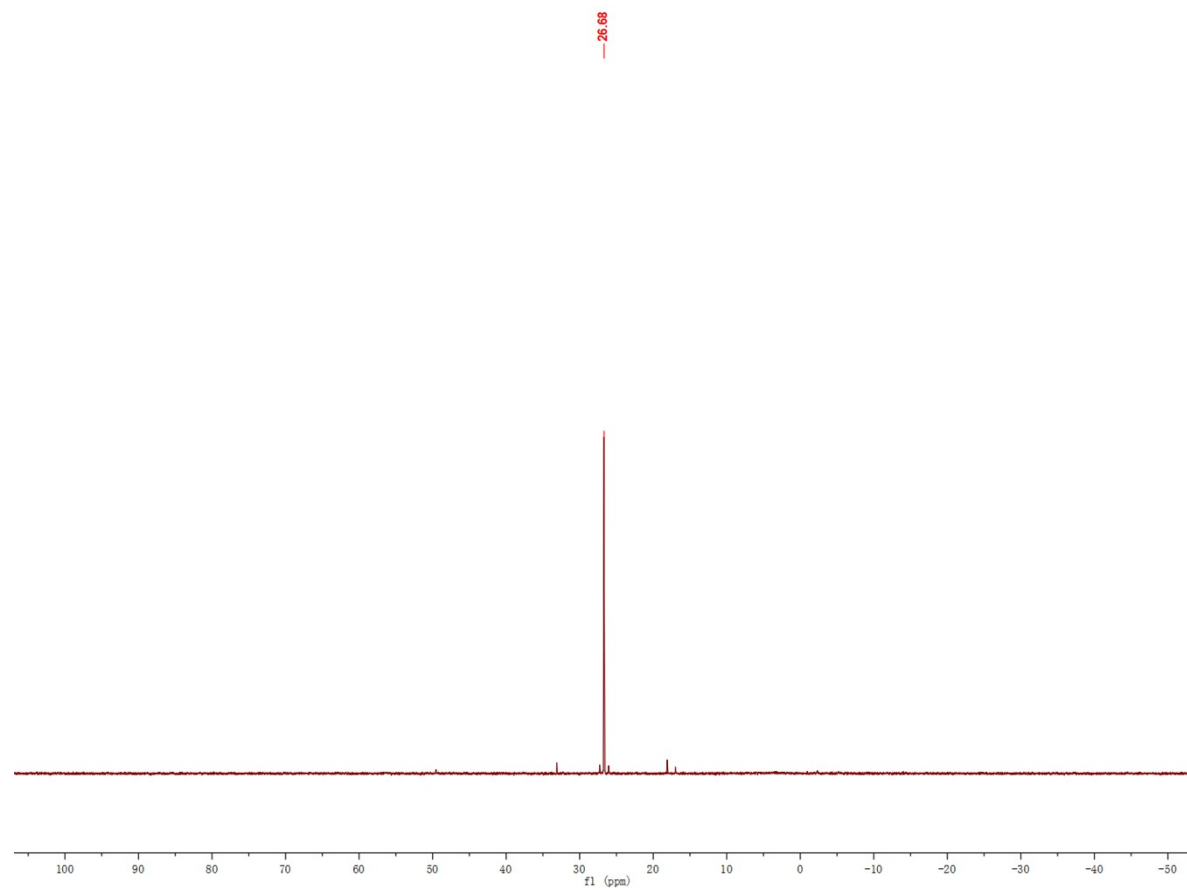

**Fig. S13**  $^{31}\text{P}$  NMR spectrum of **1** in  $\text{C}_6\text{D}_6$

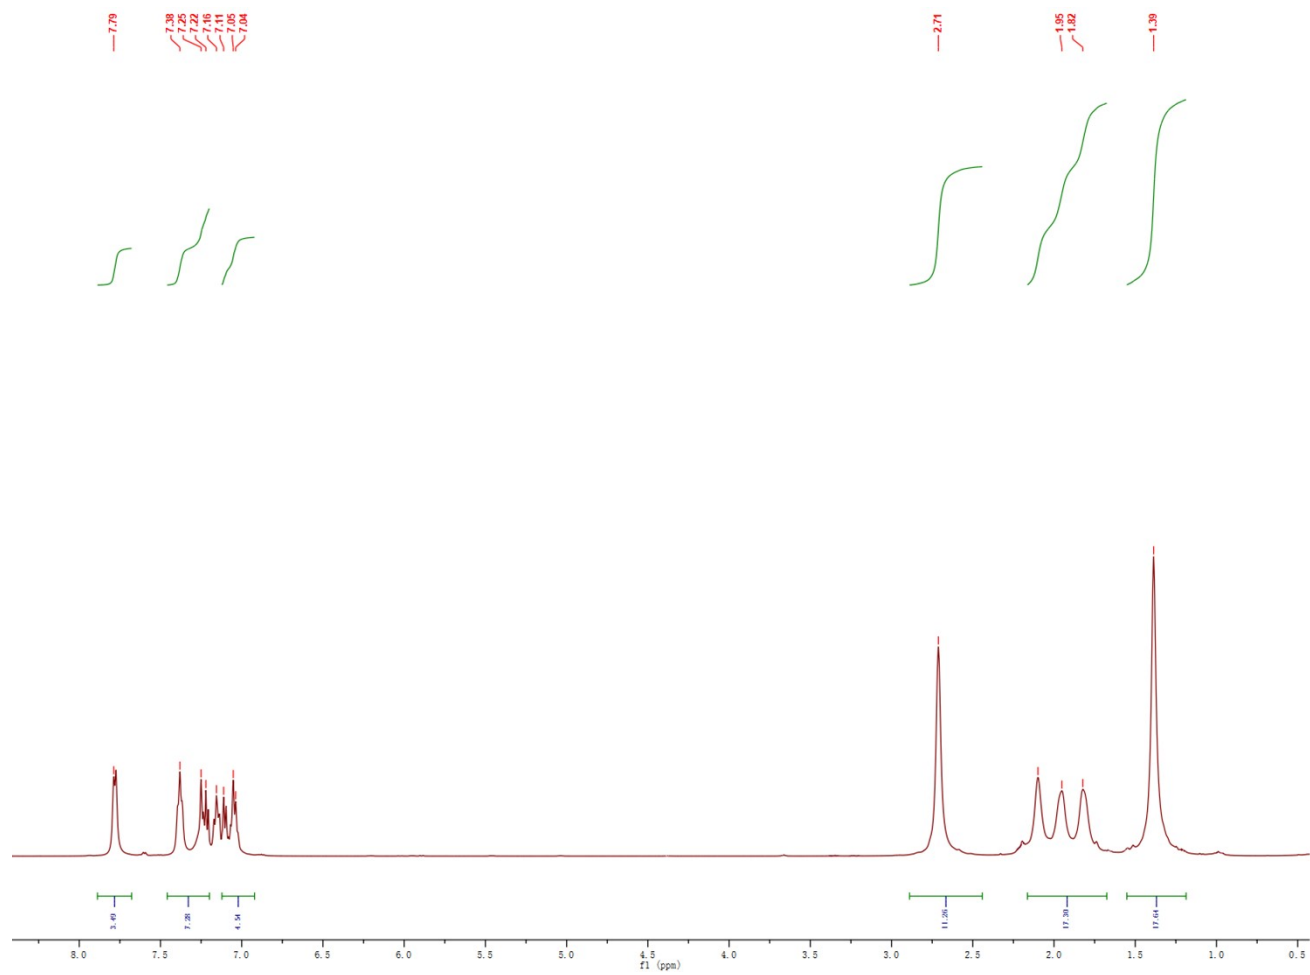

**Fig. S14**  $^1\text{H}$  NMR spectrum of **2** in  $\text{C}_6\text{D}_6$



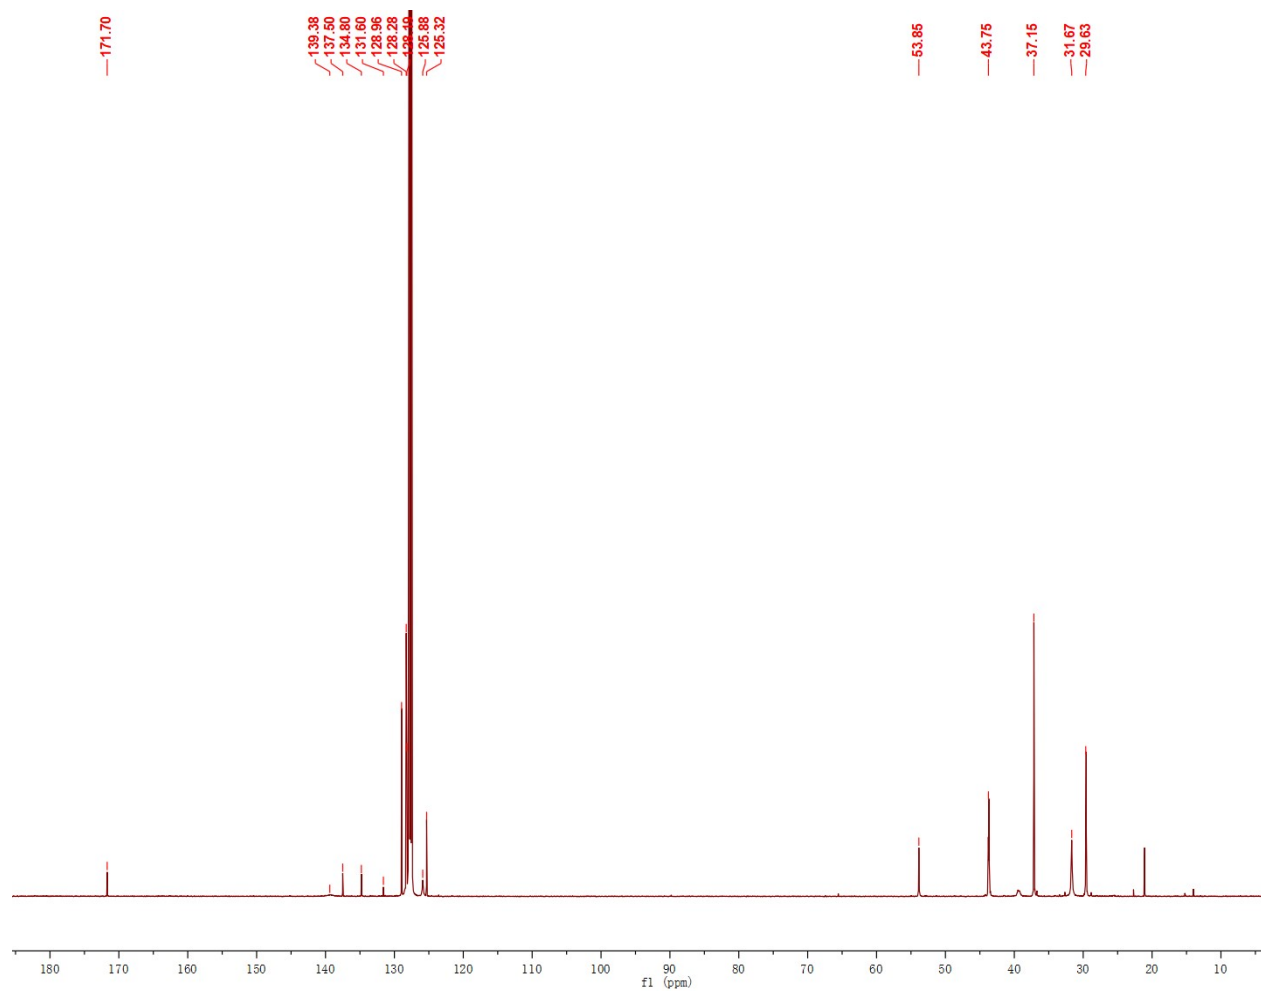

**Fig. S15**  $^{13}\text{C}$  NMR spectrum of **2** in  $\text{C}_6\text{D}_6$

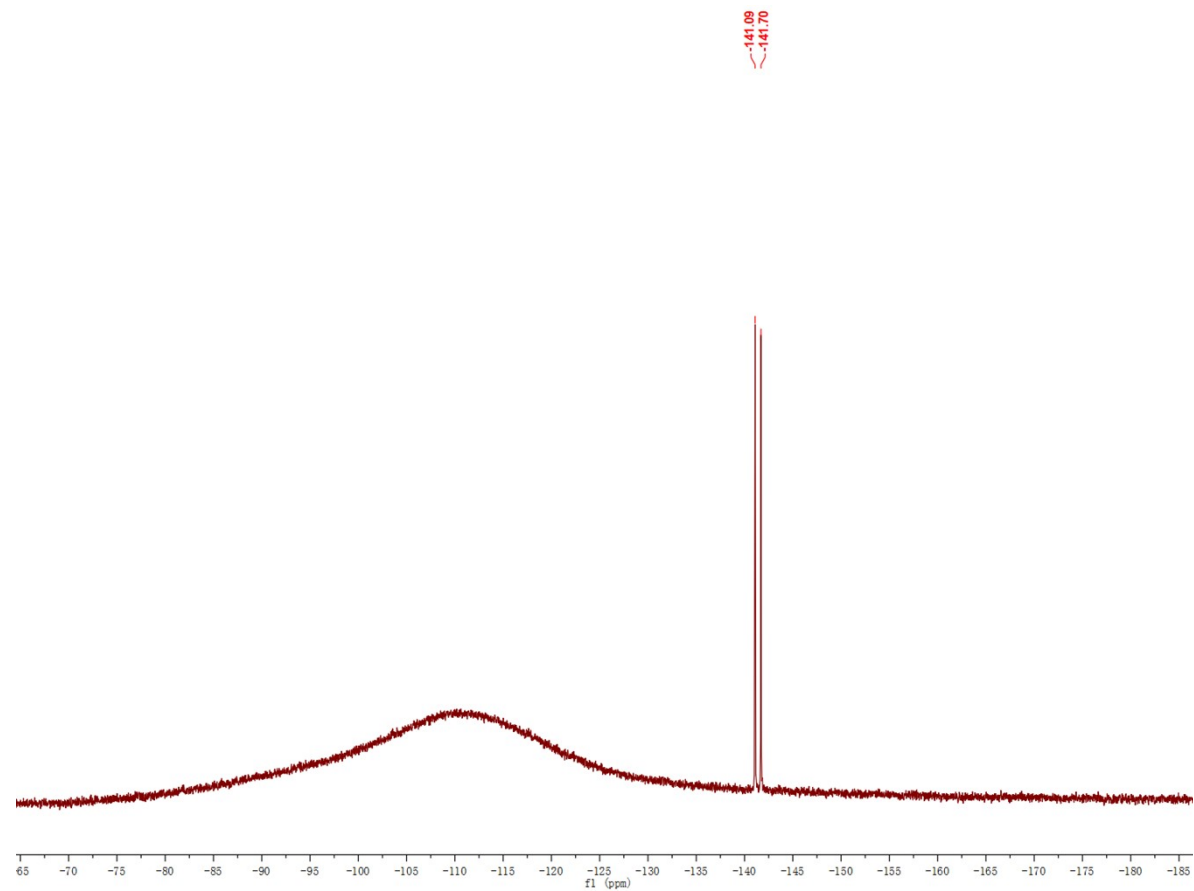

**Fig. S16**  $^{29}\text{Si}$  NMR spectrum of **2** in  $\text{C}_6\text{D}_6$

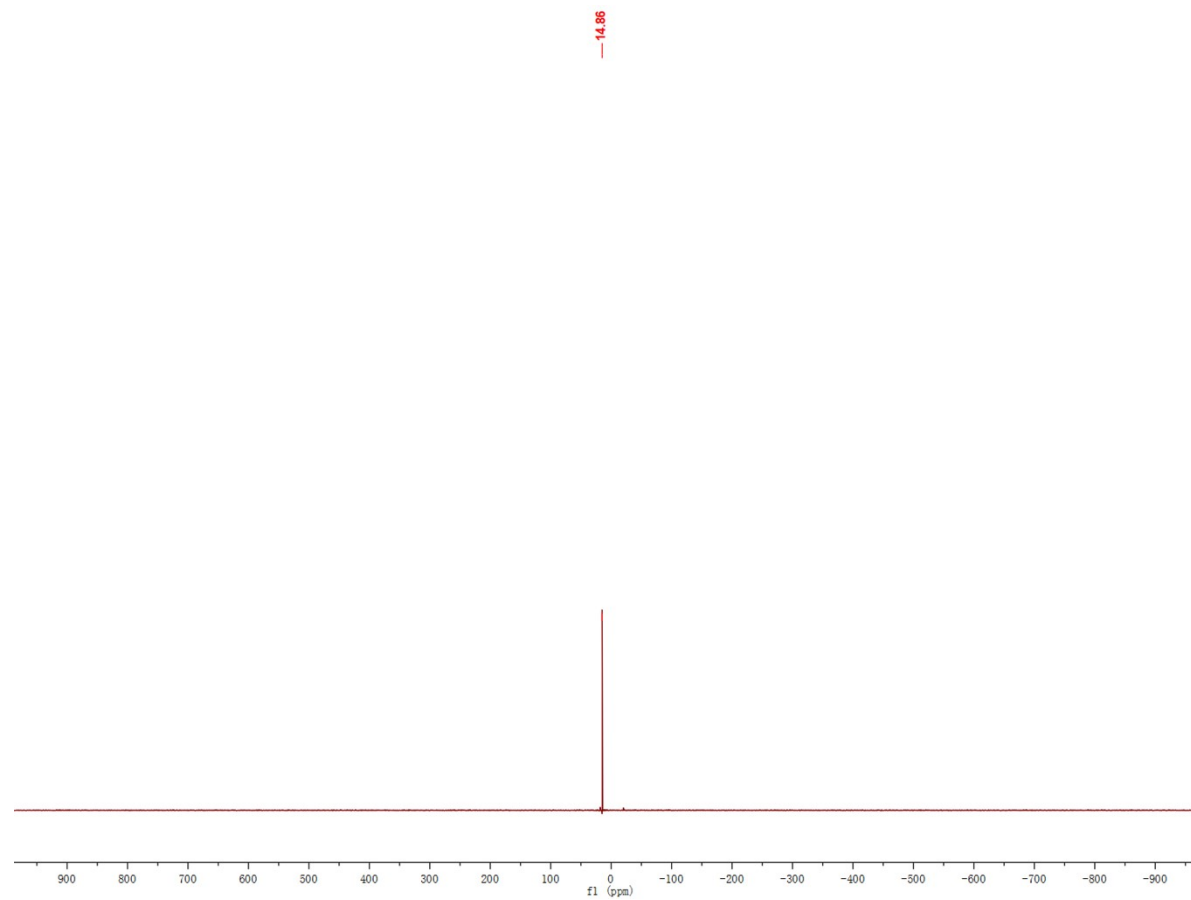

**Fig. S17**  $^{31}\text{P}$  NMR spectrum of **2** in  $\text{C}_6\text{D}_6$

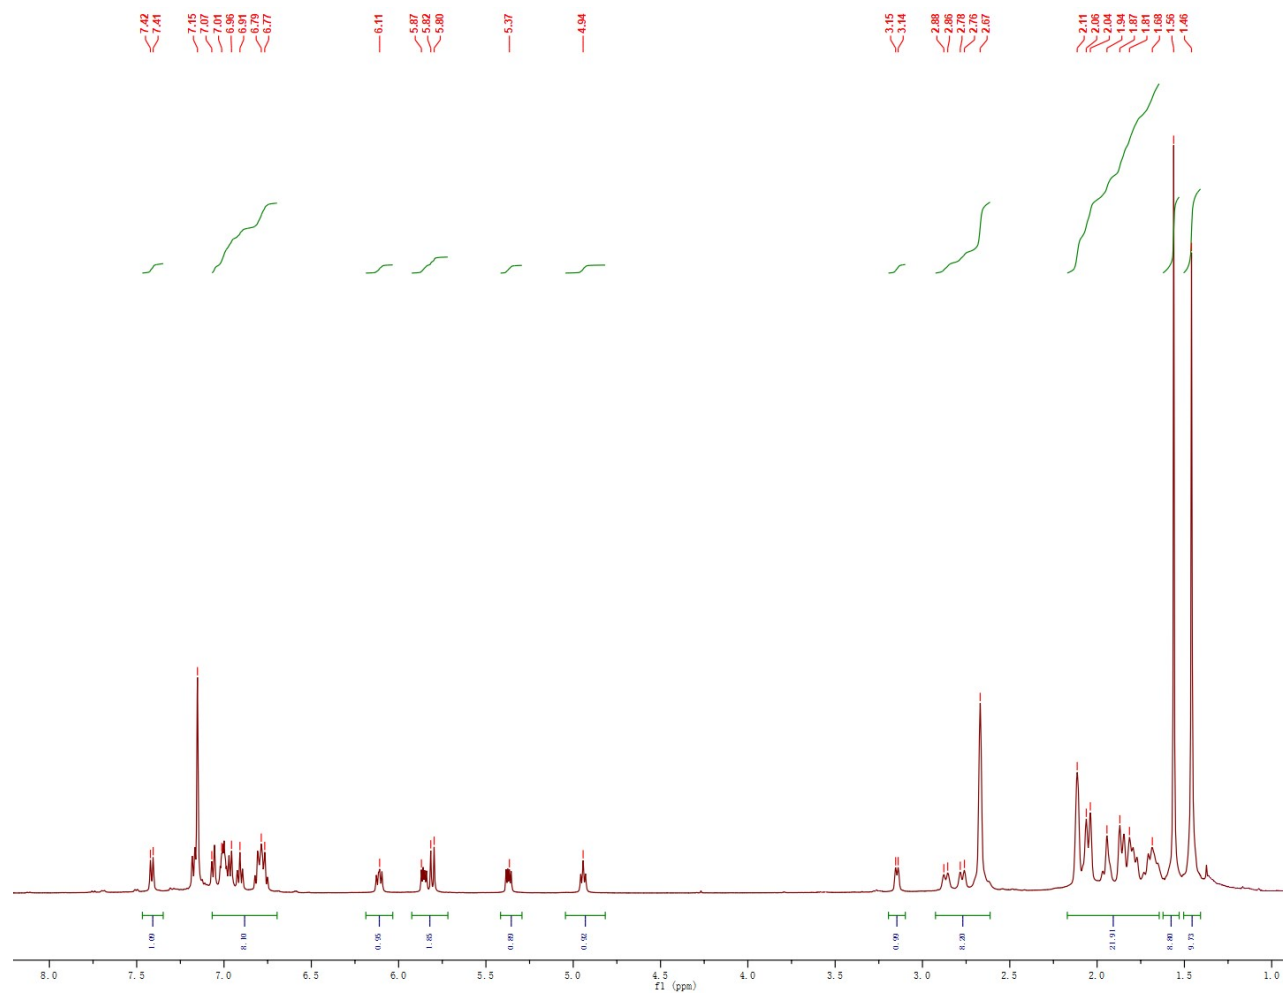

**Fig. S18**  $^1\text{H}$  NMR spectrum of **3a** in  $\text{C}_6\text{D}_6$

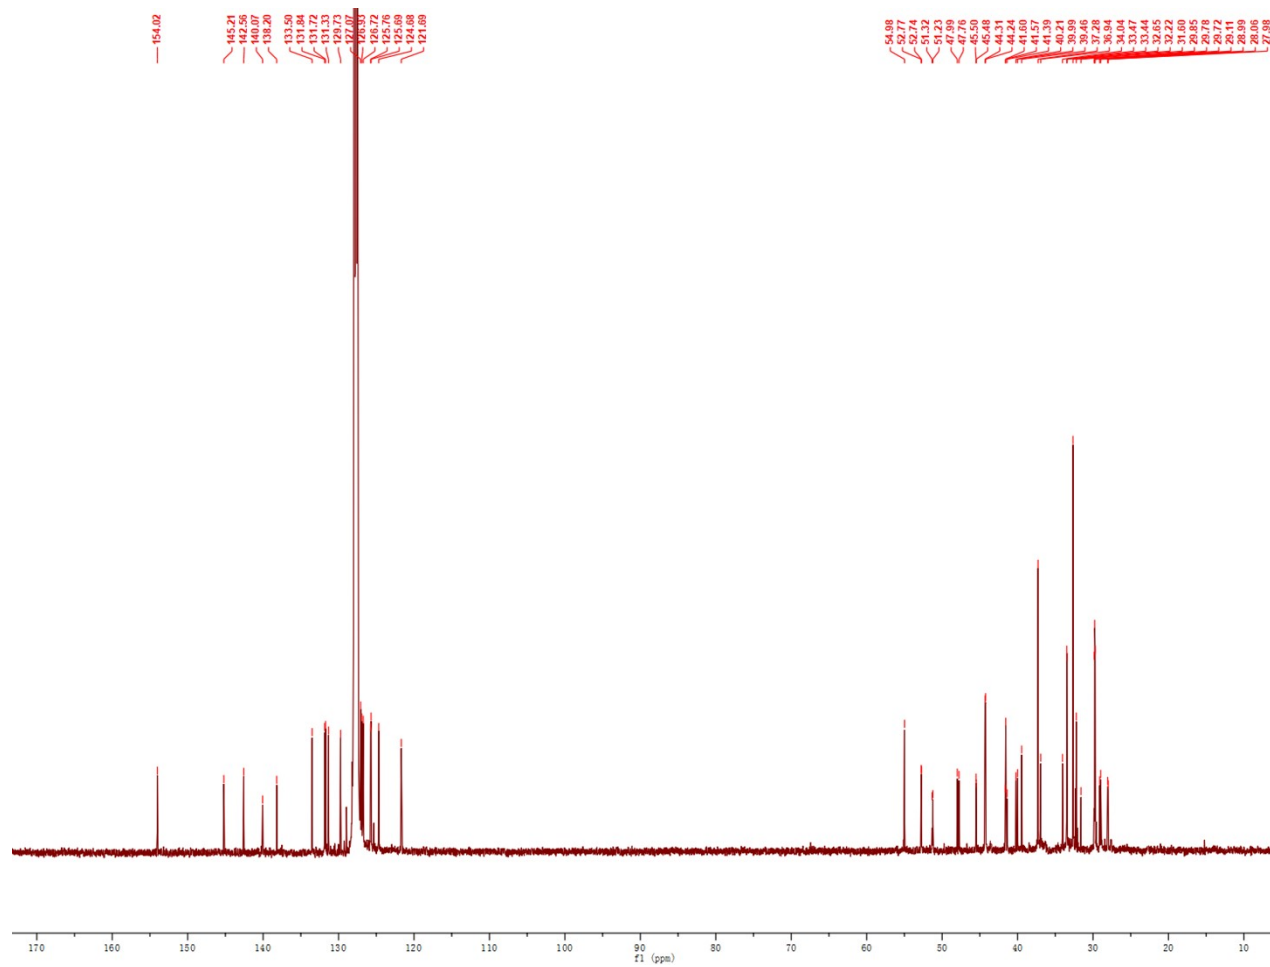

Fig. S19  $^{13}\text{C}$  NMR spectrum of **3a** in  $\text{C}_6\text{D}_6$

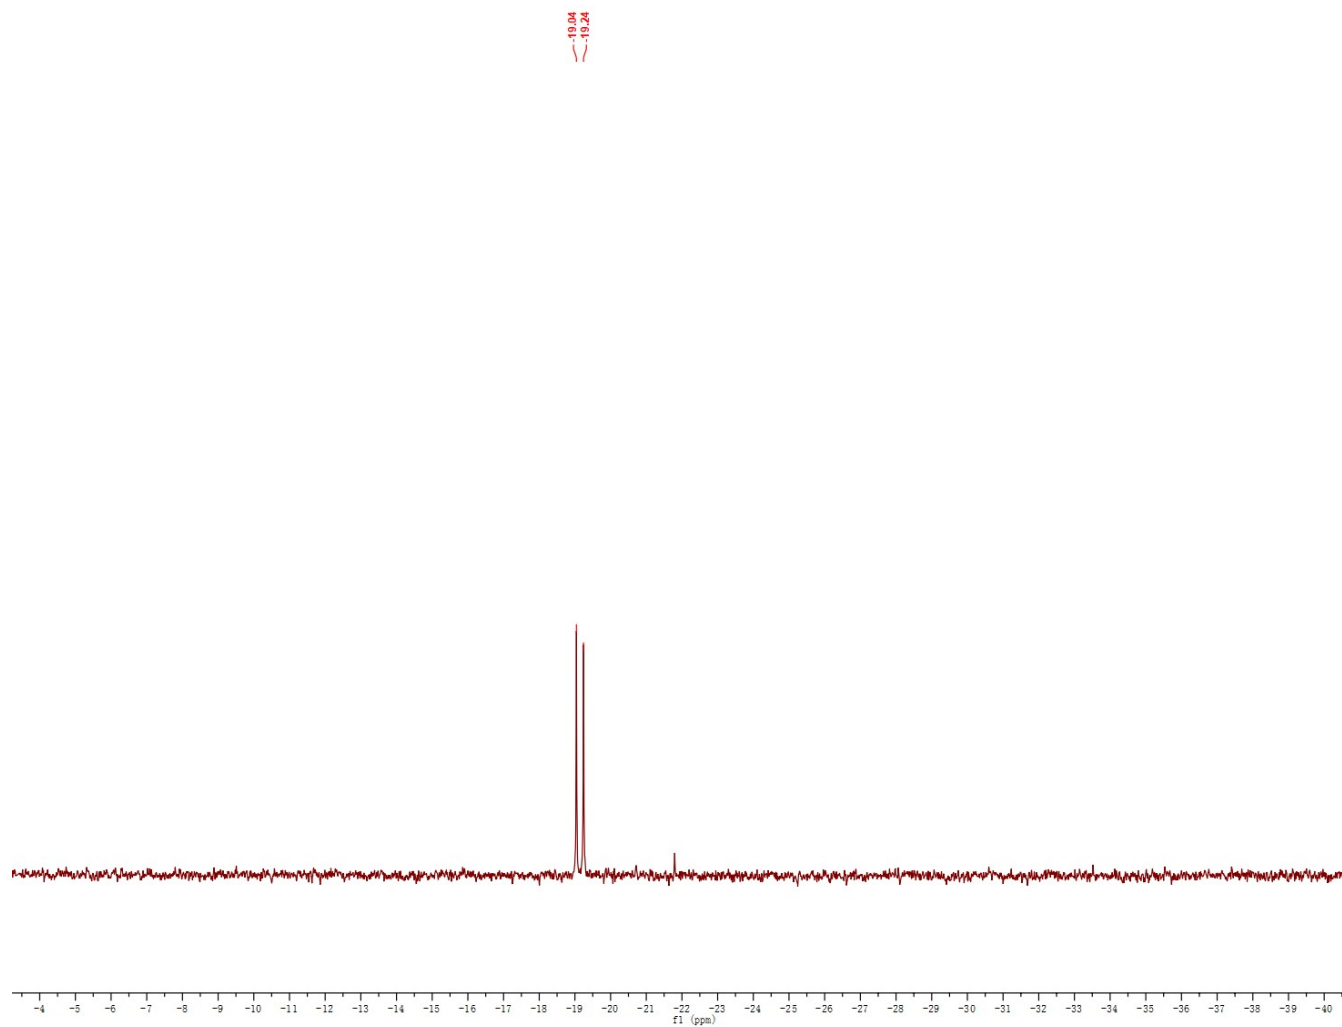

**Fig. S20**  $^{29}\text{Si}$  NMR spectrum of **3a** in  $\text{C}_6\text{D}_6$

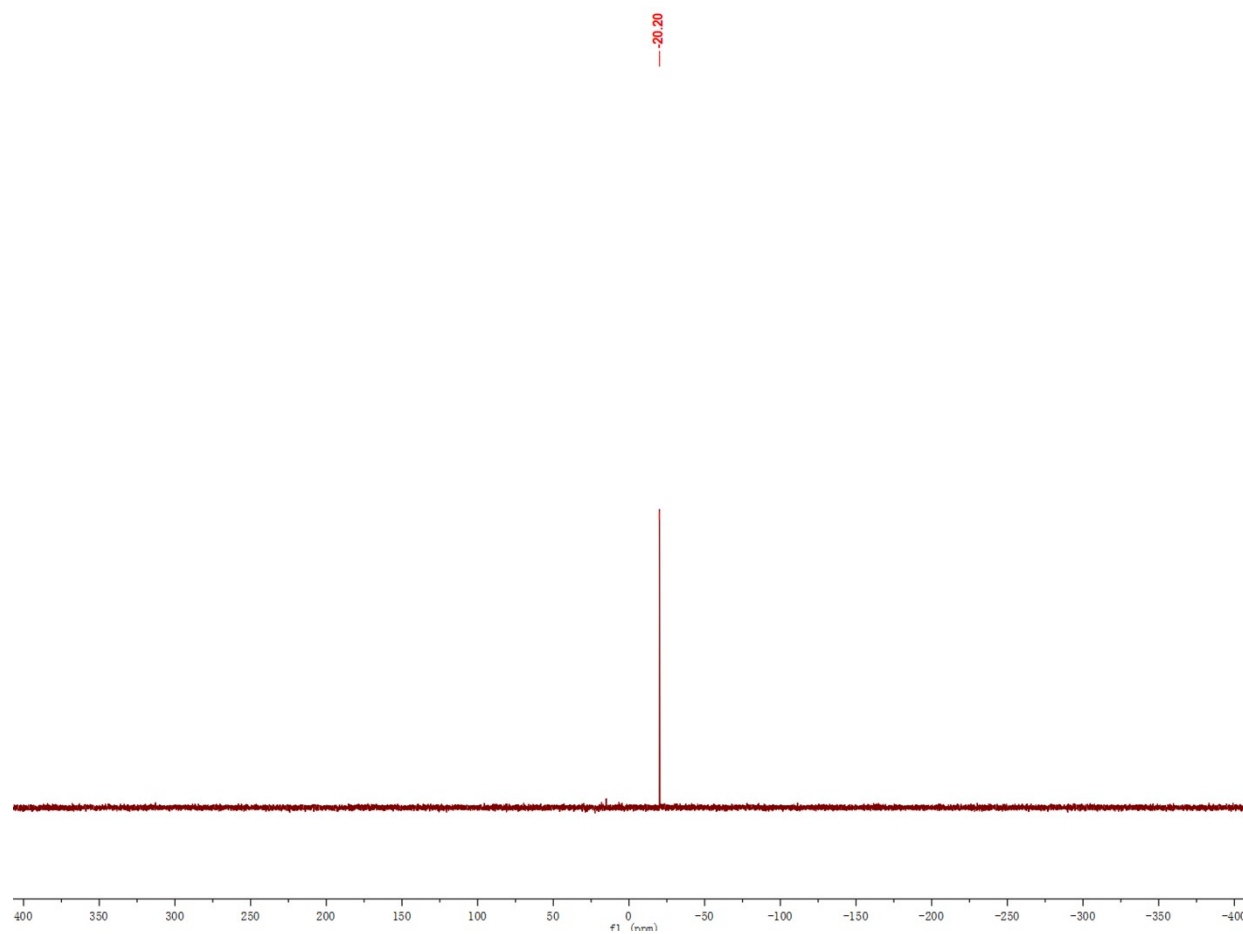

**Fig. S21**  $^{31}\text{P}$  NMR spectrum of **3a** in  $\text{C}_6\text{D}_6$

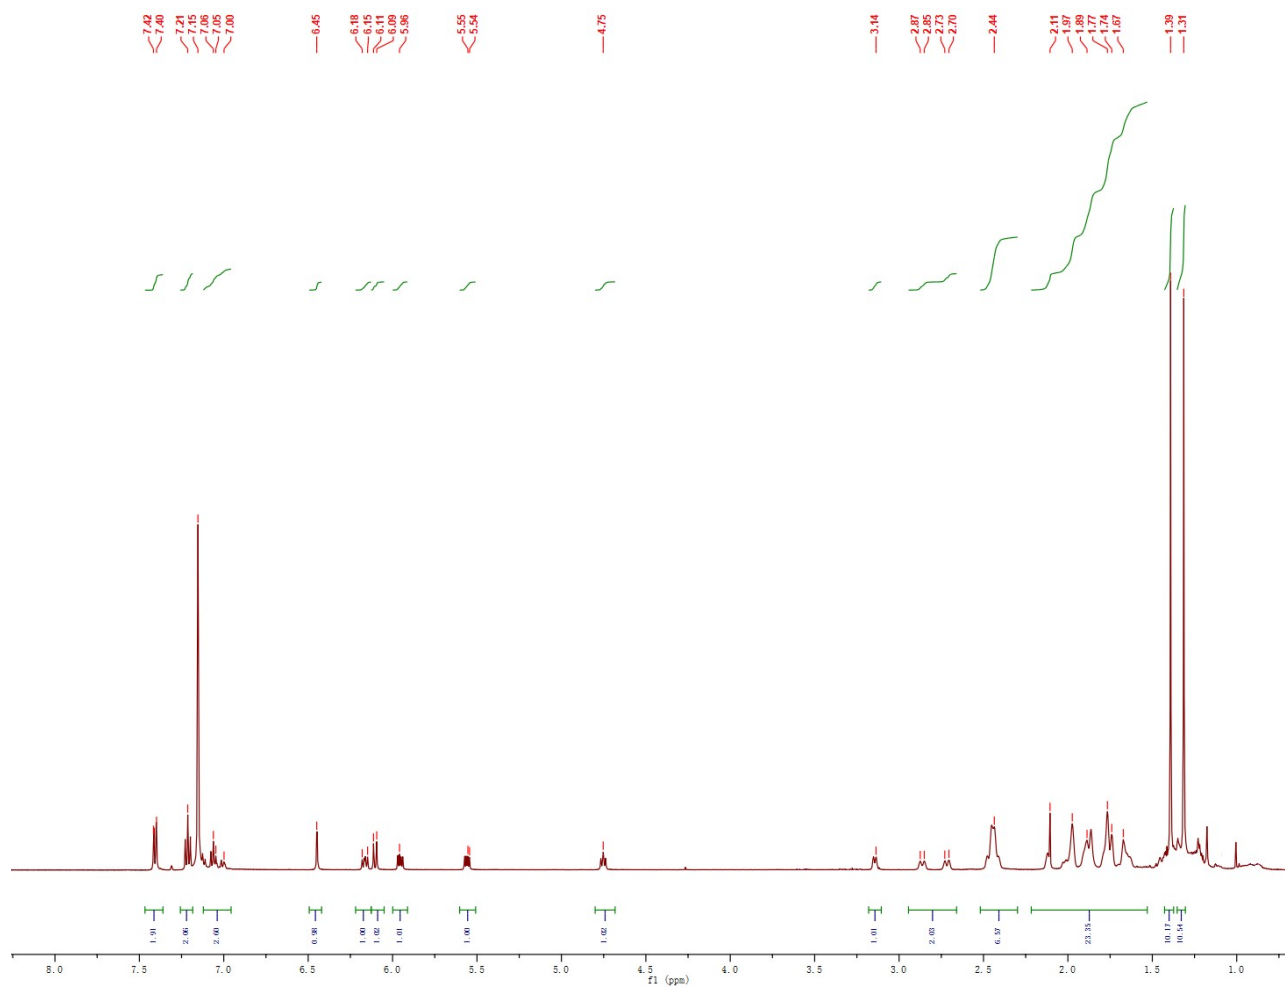

Fig. S22  $^1\text{H}$  NMR spectrum of **3b** in  $\text{C}_6\text{D}_6$



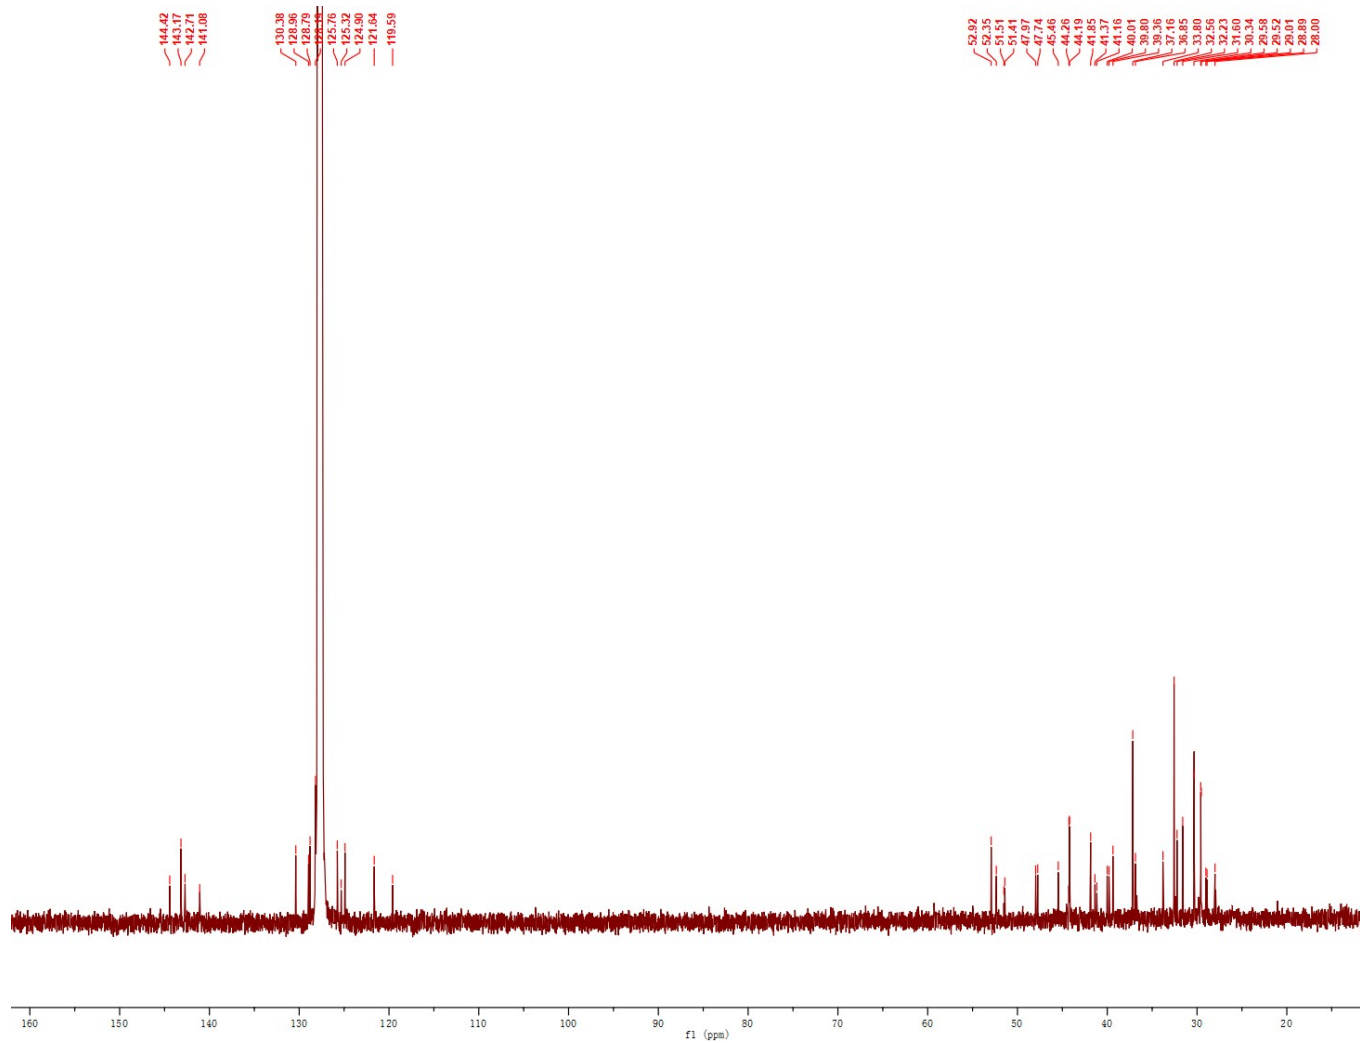

**Fig. S23**  $^{13}\text{C}$  NMR spectrum of **3b** in  $\text{C}_6\text{D}_6$

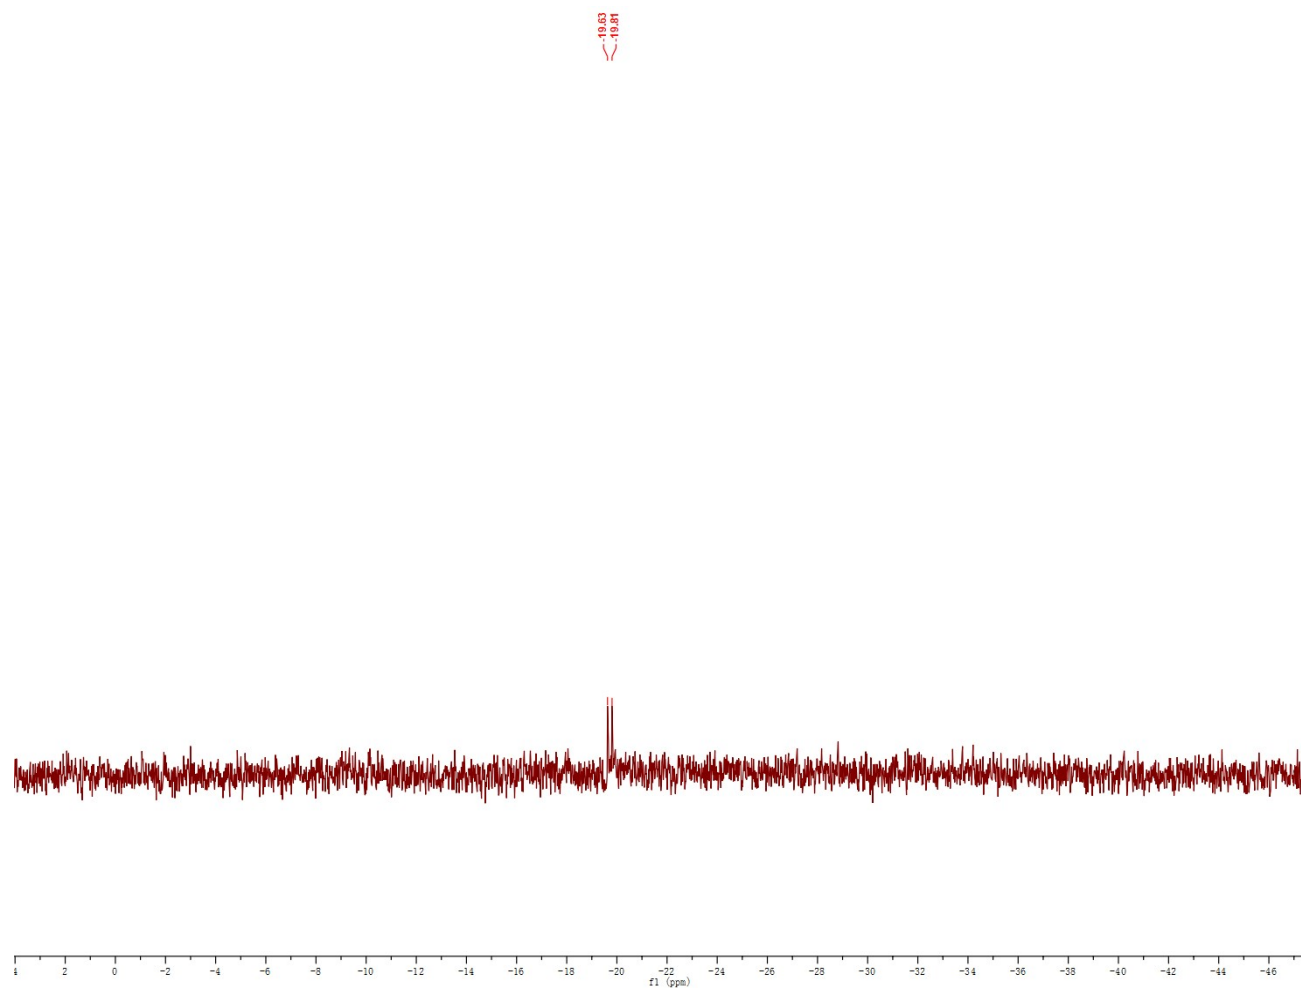

**Fig. S24**  $^{29}\text{Si}$  NMR spectrum of **3b** in  $\text{C}_6\text{D}_6$

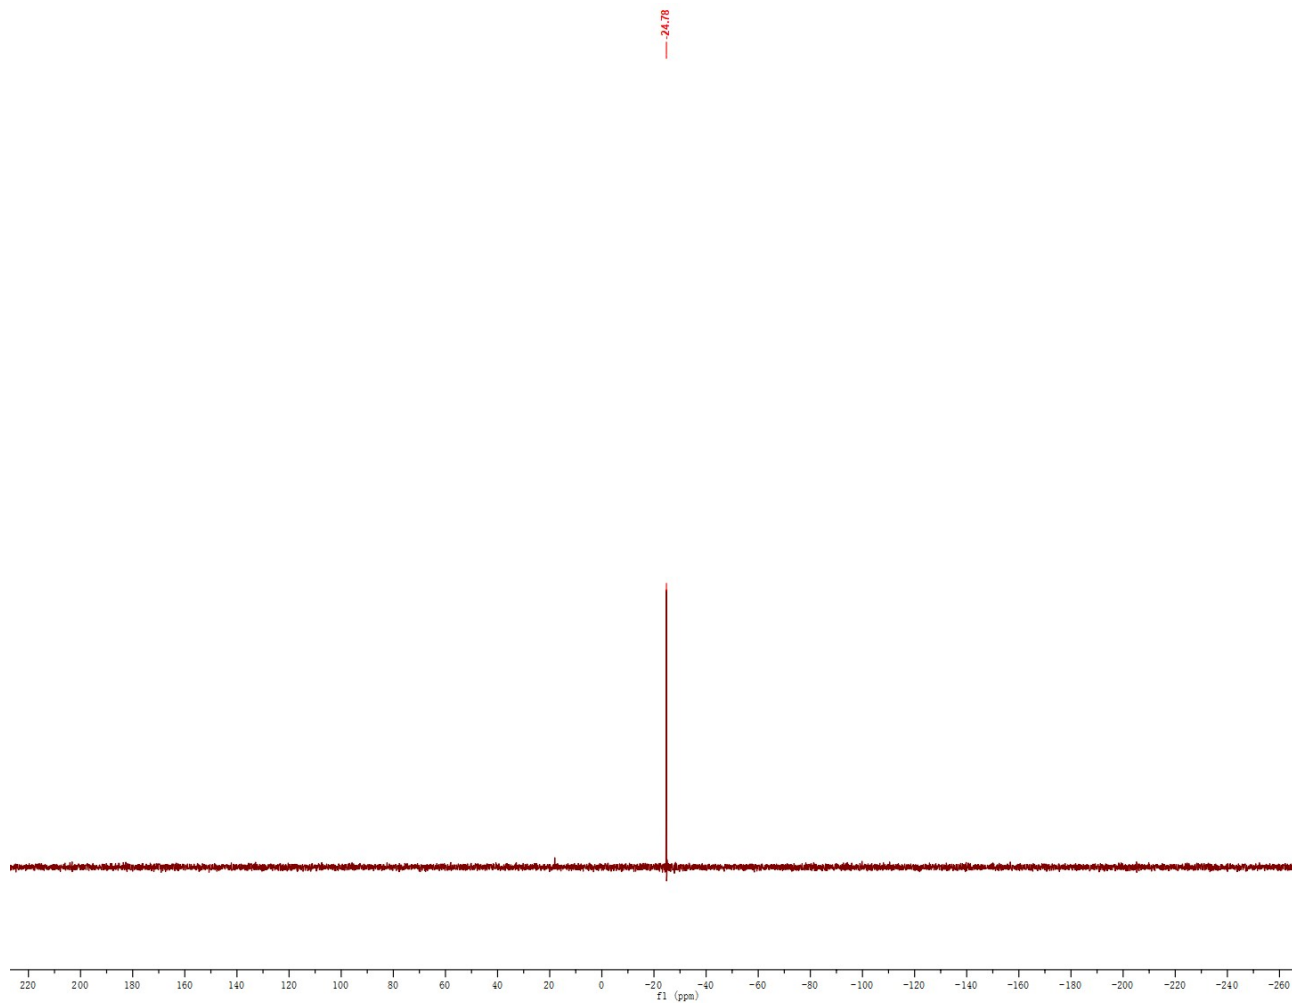

**Fig. S25**  $^{31}\text{P}$  NMR spectrum of **3b** in  $\text{C}_6\text{D}_6$

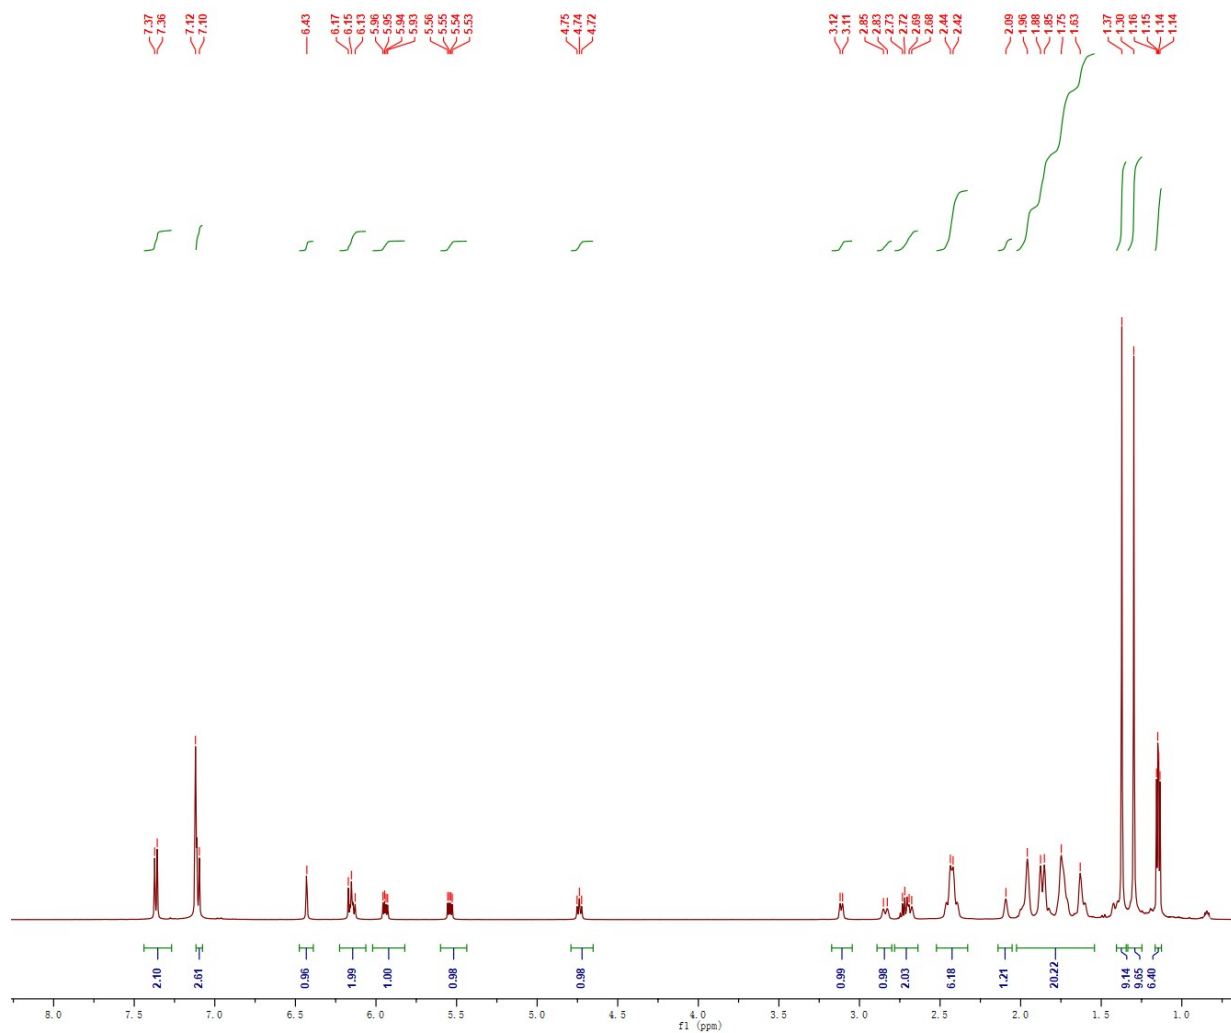

Fig. S26 <sup>1</sup>H NMR spectrum of **3c** in C<sub>6</sub>D<sub>6</sub>

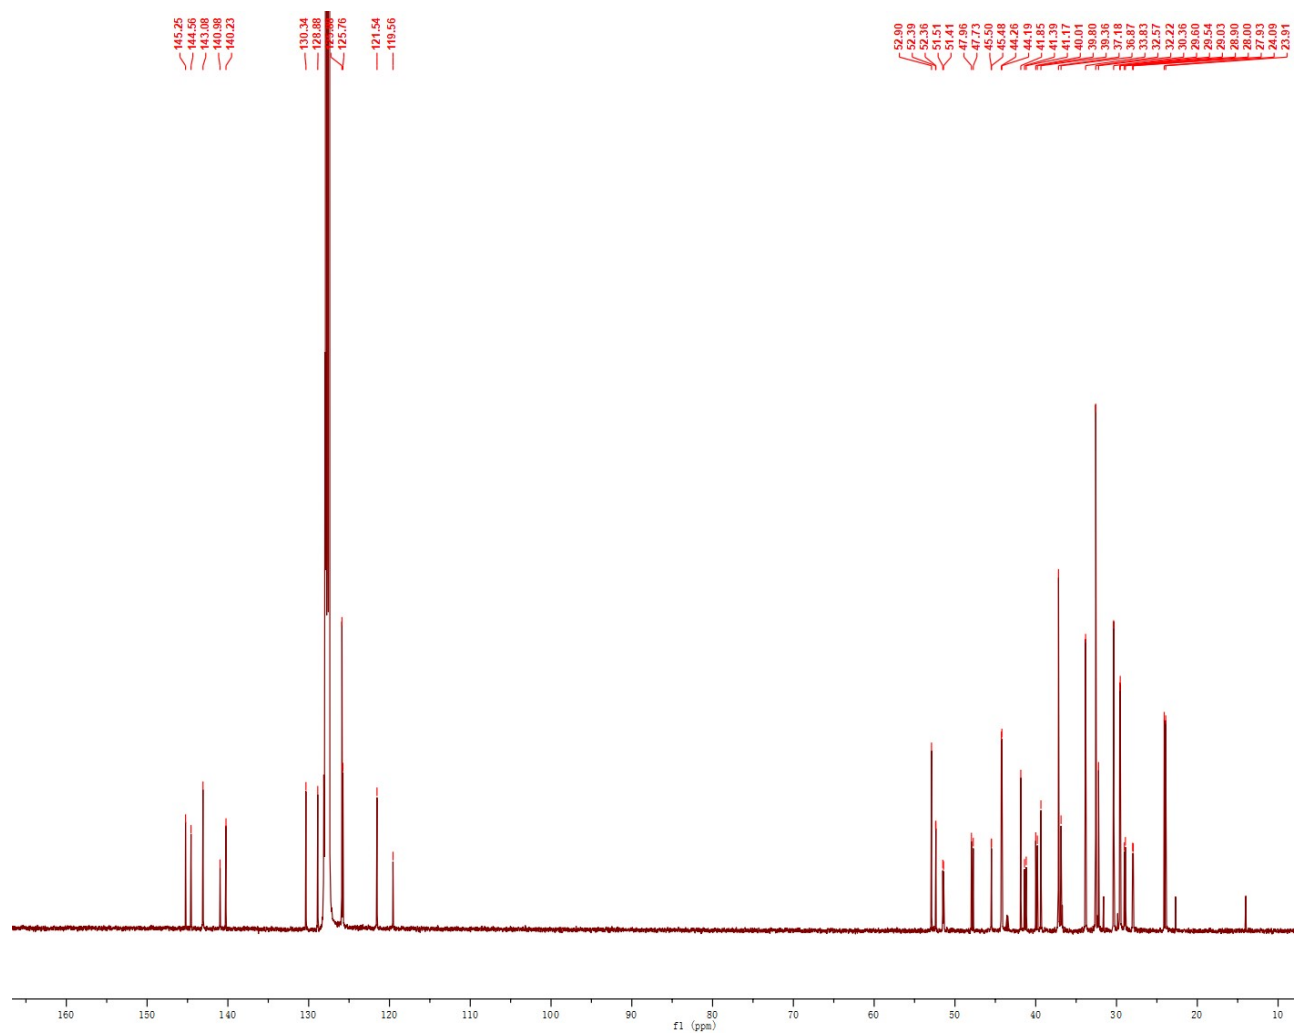

Fig. S27  $^{13}\text{C}$  NMR spectrum of **3c** in  $\text{C}_6\text{D}_6$

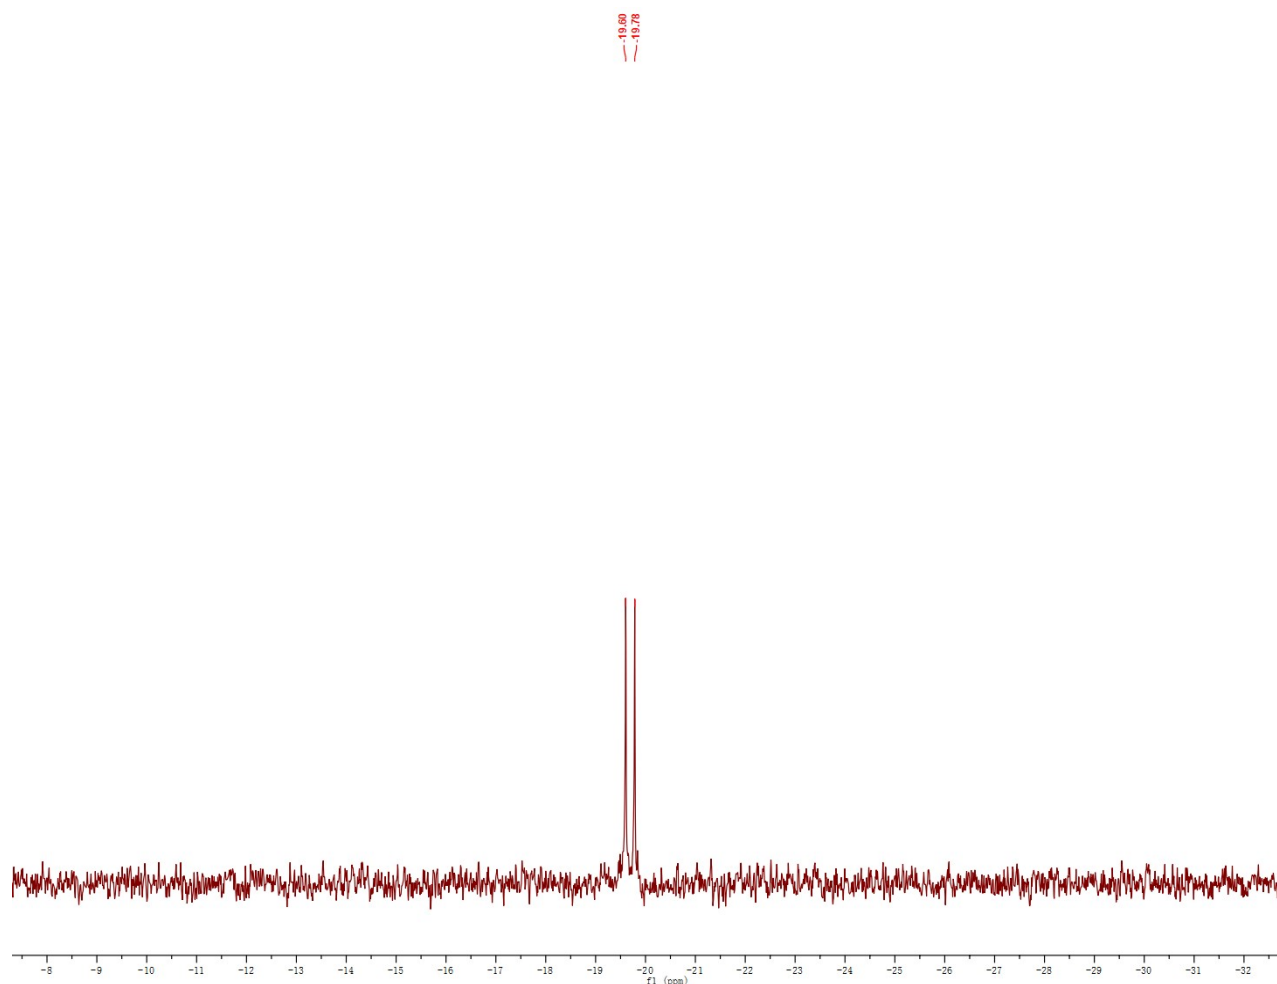

**Fig. S28**  $^{29}\text{Si}$  NMR spectrum of **3c** in  $\text{C}_6\text{D}_6$

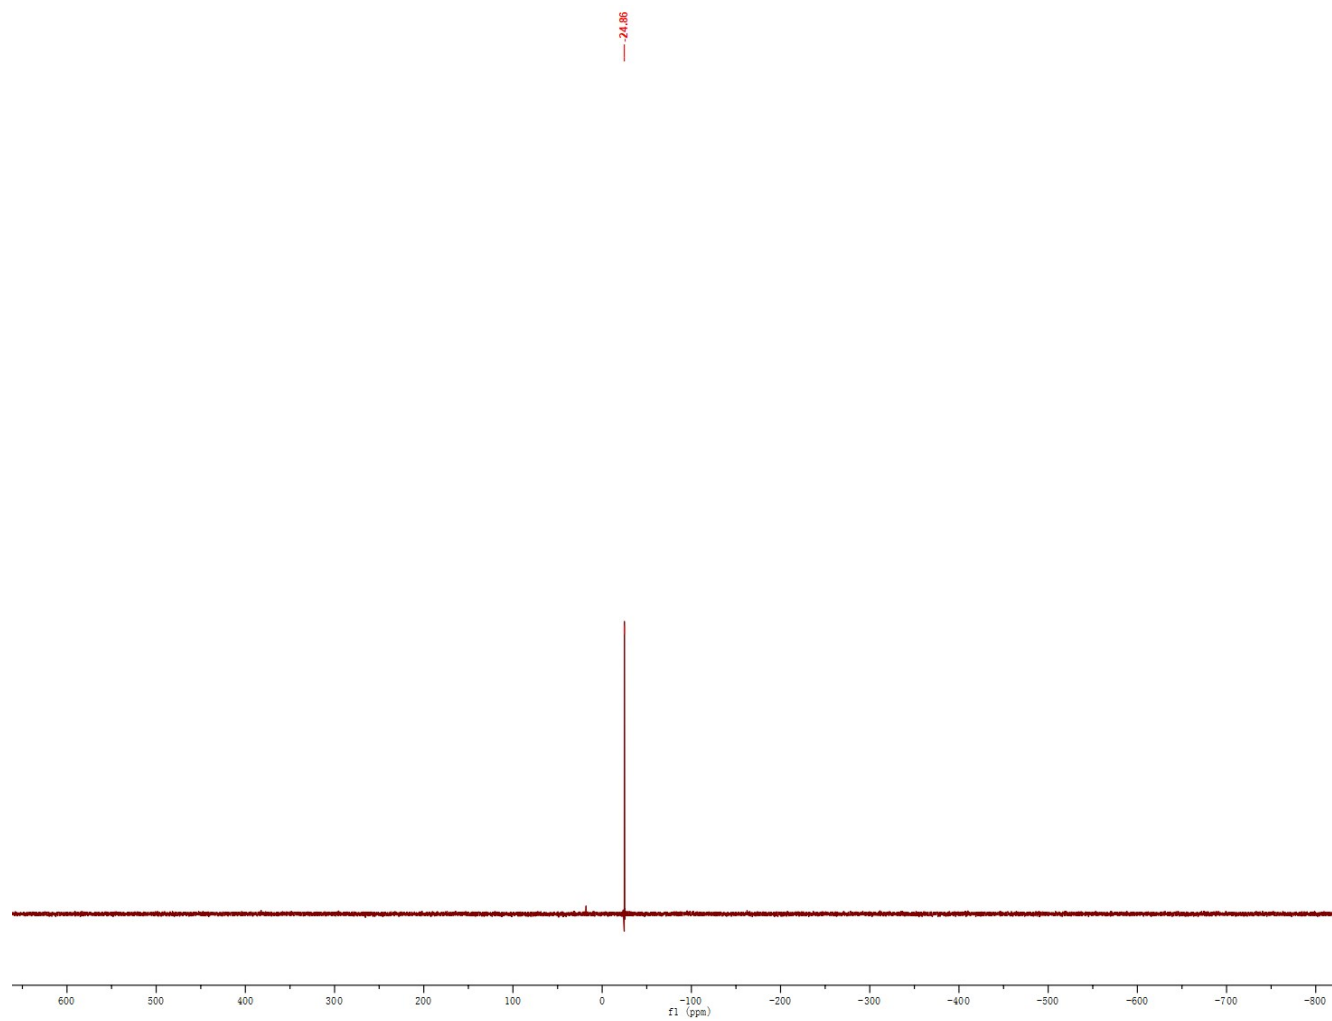

**Fig. S29**  $^{31}\text{P}$  NMR spectrum of **3c** in  $\text{C}_6\text{D}_6$

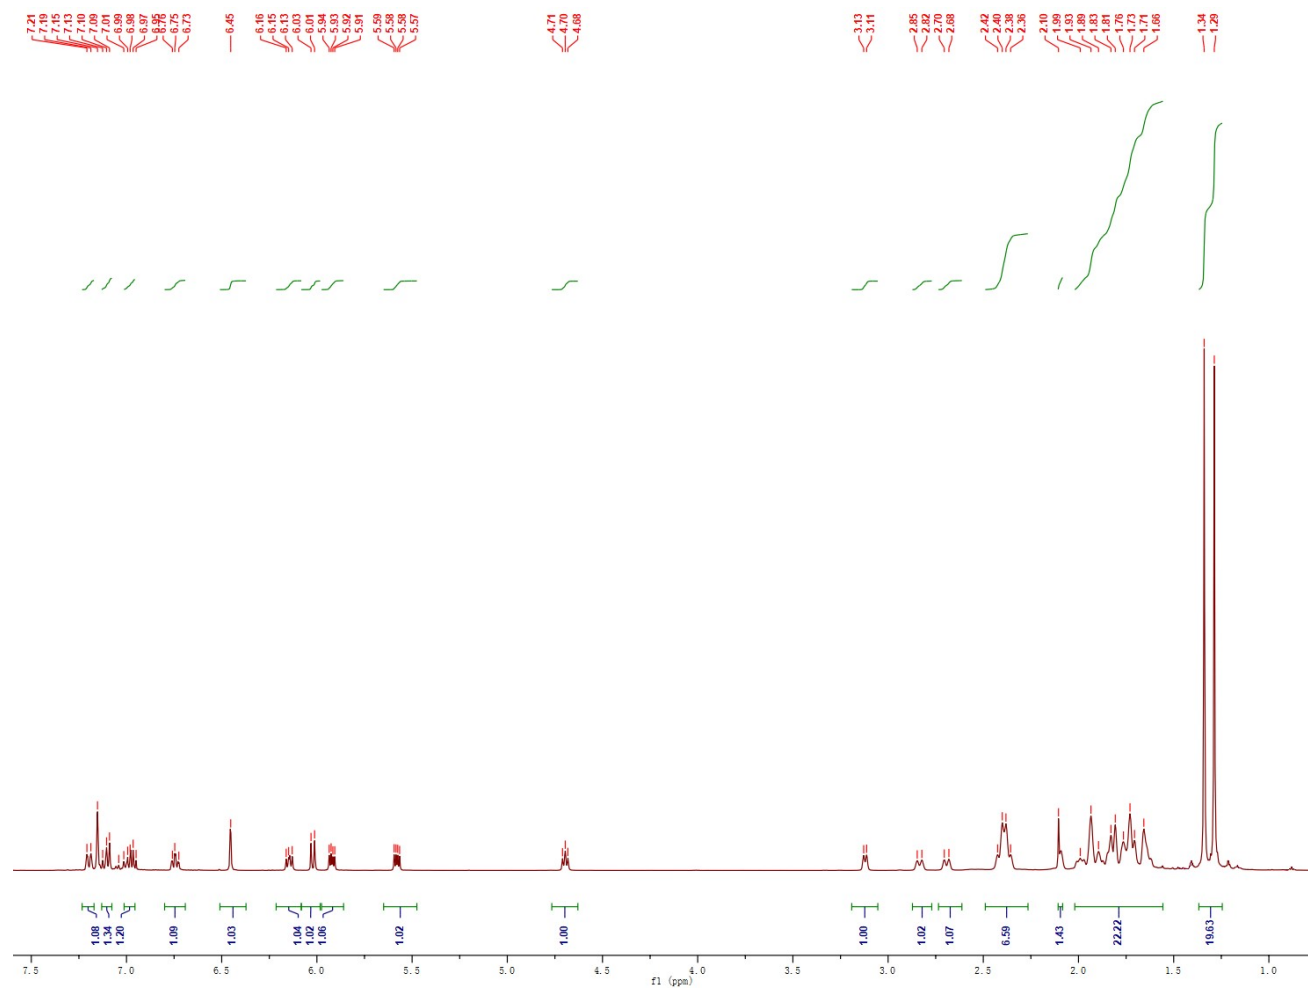

Fig. S30  $^1\text{H}$  NMR spectrum of **3d** in  $\text{C}_6\text{D}_6$



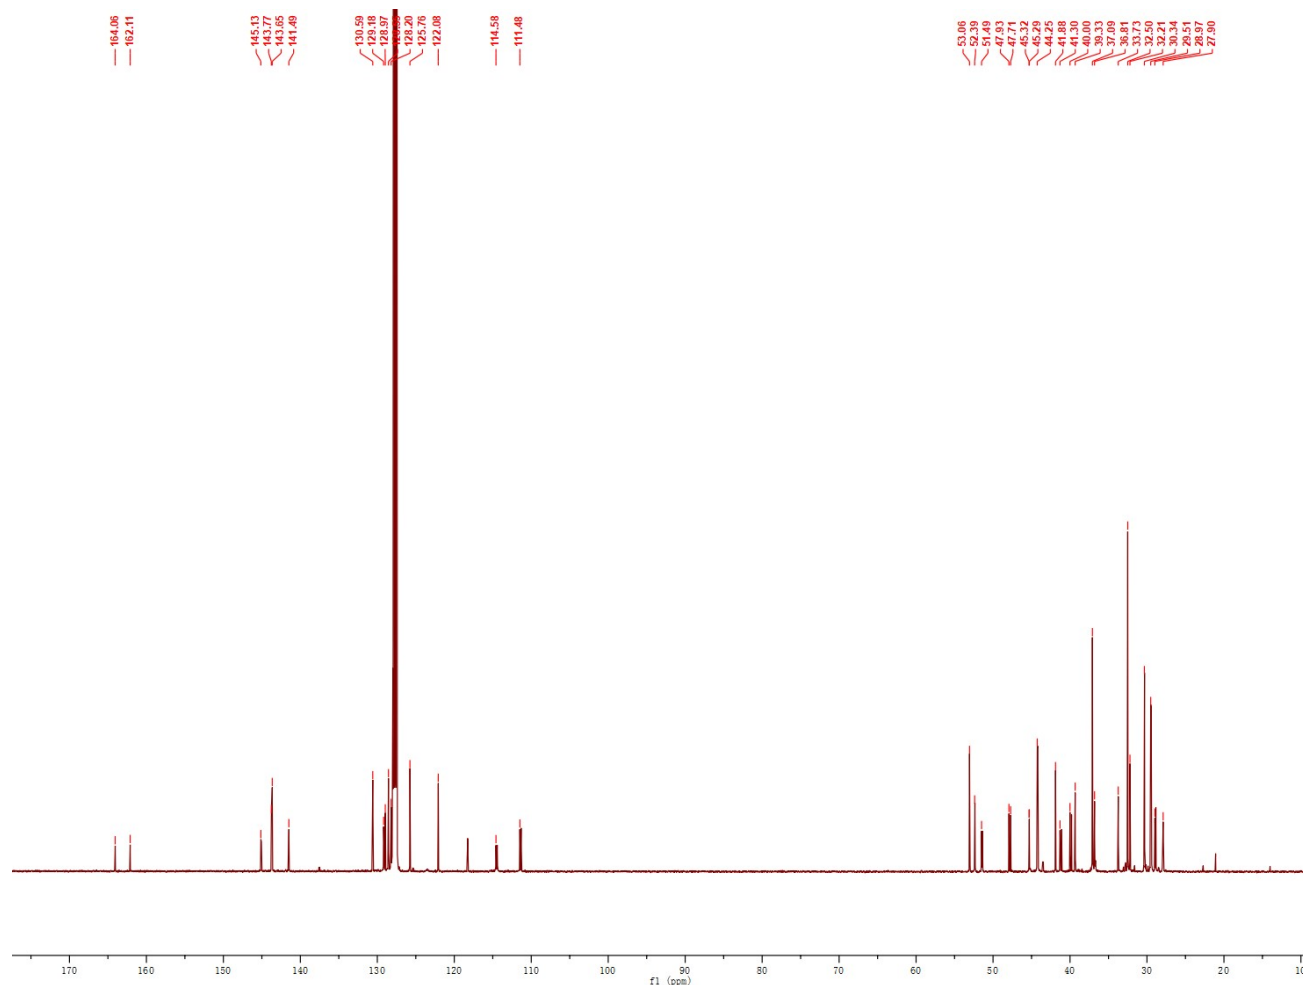

Fig. S31  $^{13}\text{C}$  NMR spectrum of **3d** in  $\text{C}_6\text{D}_6$

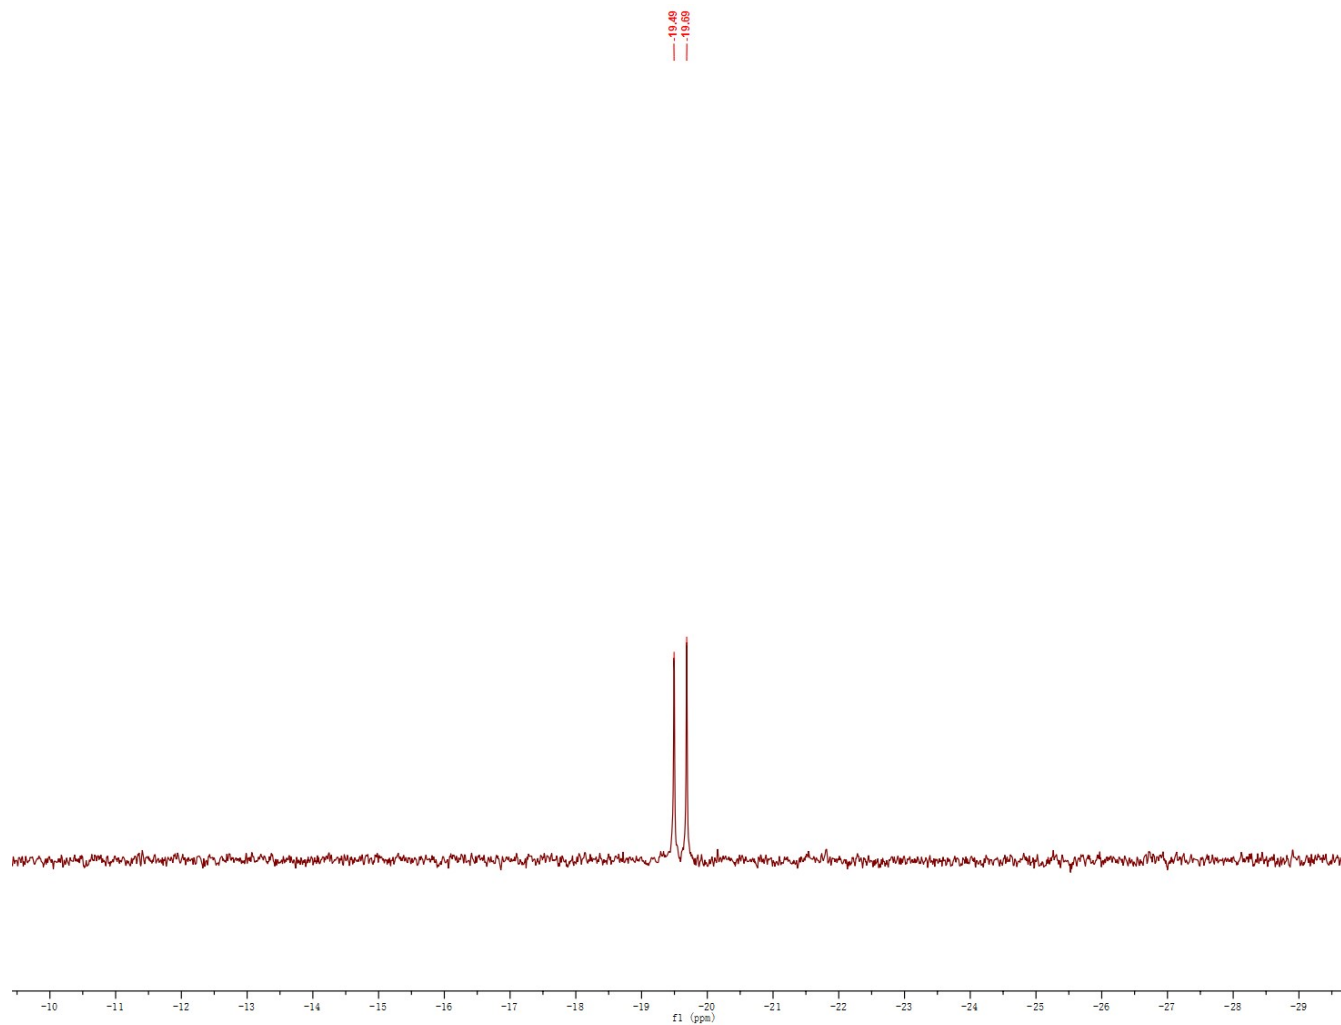

**Fig. S32**  $^{29}\text{Si}$  NMR spectrum of **3d** in  $\text{C}_6\text{D}_6$

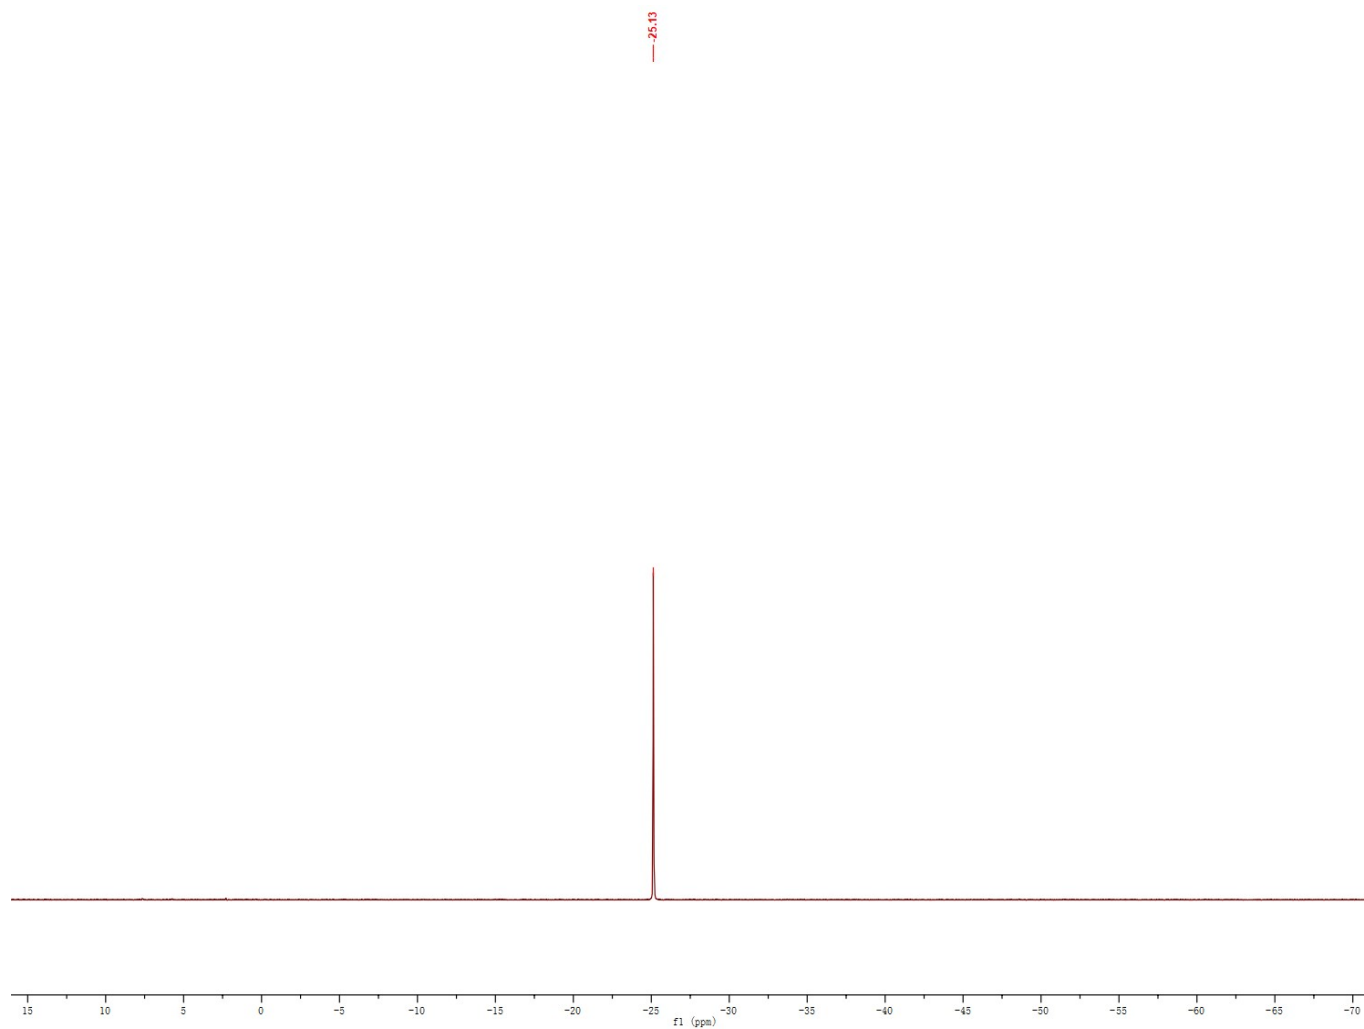

**Fig. S33**  $^{31}\text{P}$  NMR spectrum of **3d** in  $\text{C}_6\text{D}_6$

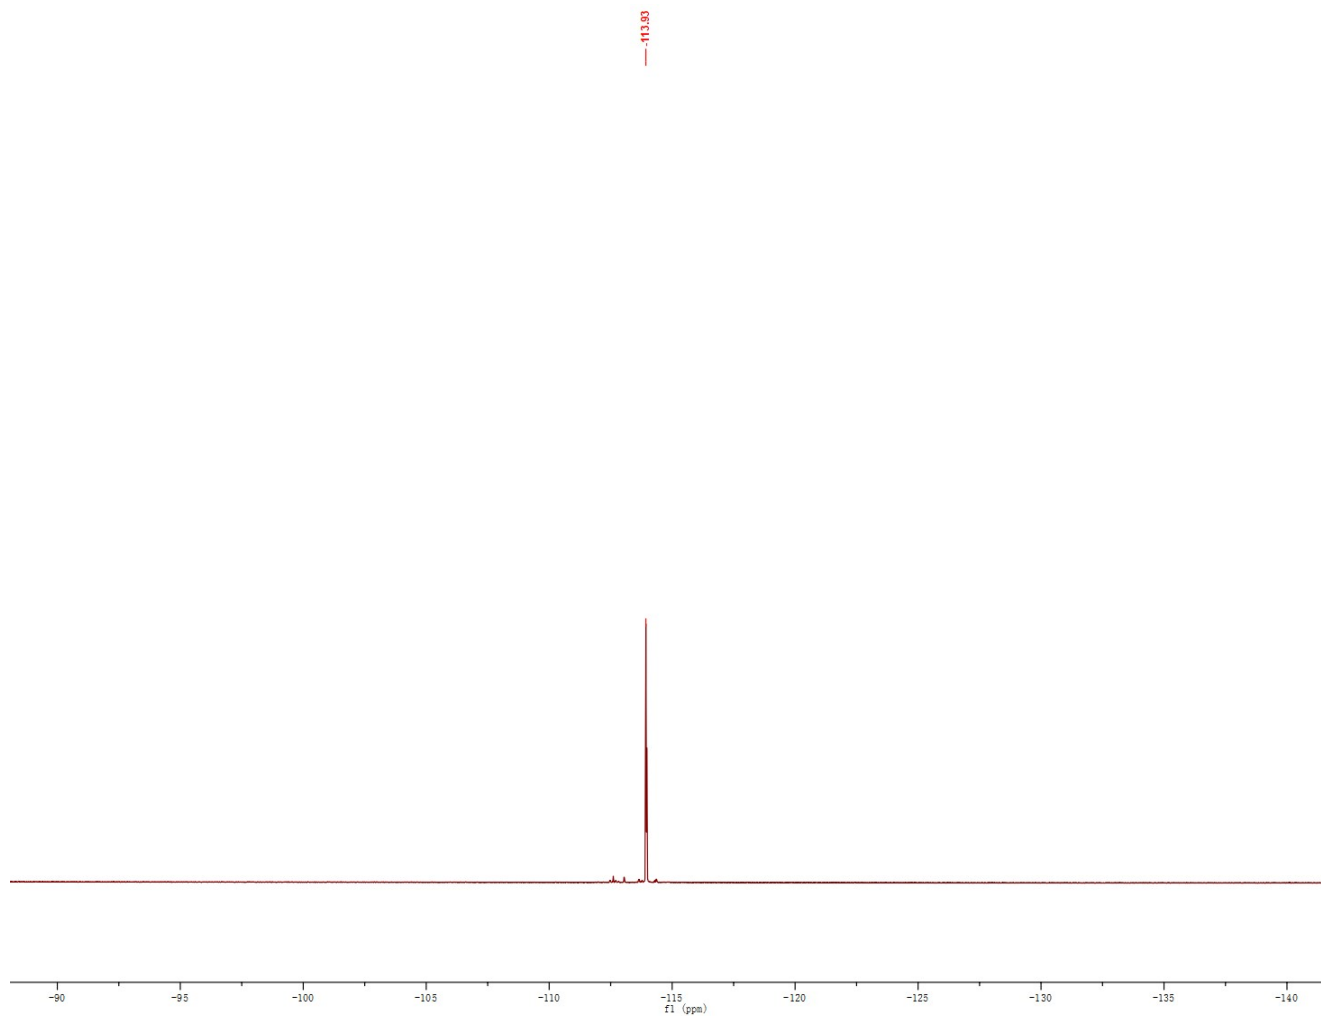

**Fig. S34**  $^{19}\text{F}$  NMR spectrum of **3d** in  $\text{C}_6\text{D}_6$

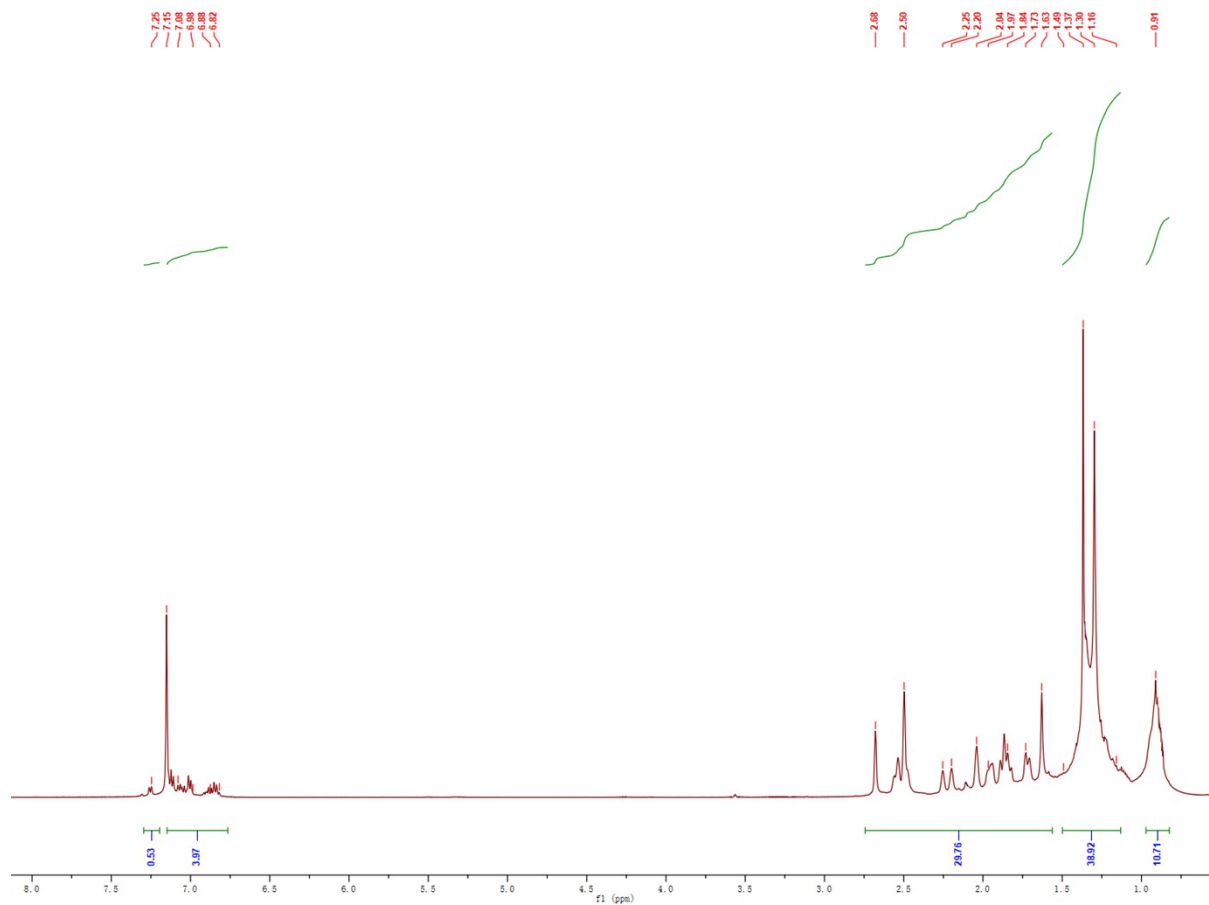

Fig. S35  $^1\text{H}$  NMR spectrum of **4** in  $\text{C}_6\text{D}_6$

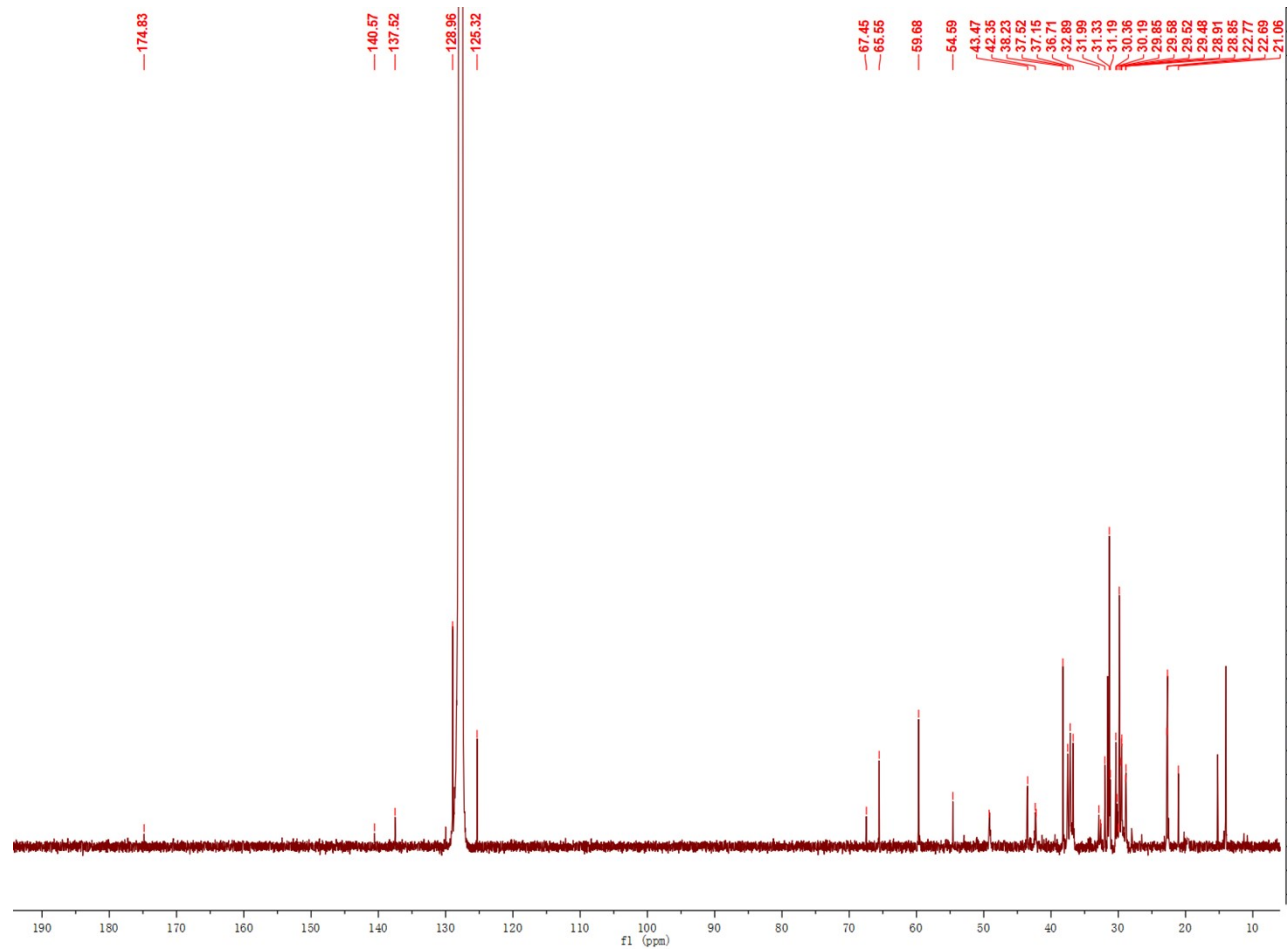

Fig. S36  $^{13}\text{C}$  NMR spectrum of **4** in  $\text{C}_6\text{D}_6$

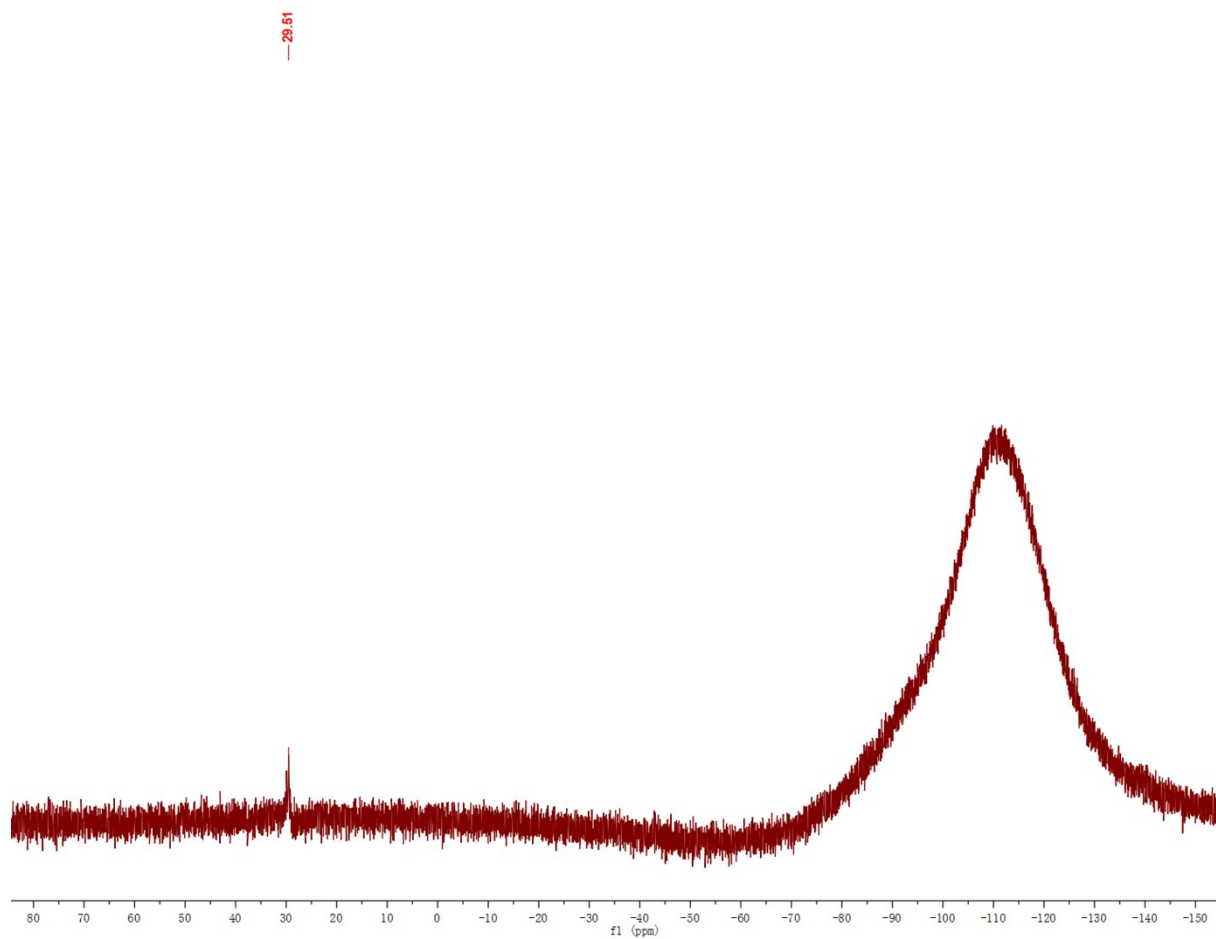

**Fig. S37**  $^{29}\text{Si}$  NMR spectrum of **4** in  $\text{C}_6\text{D}_6$

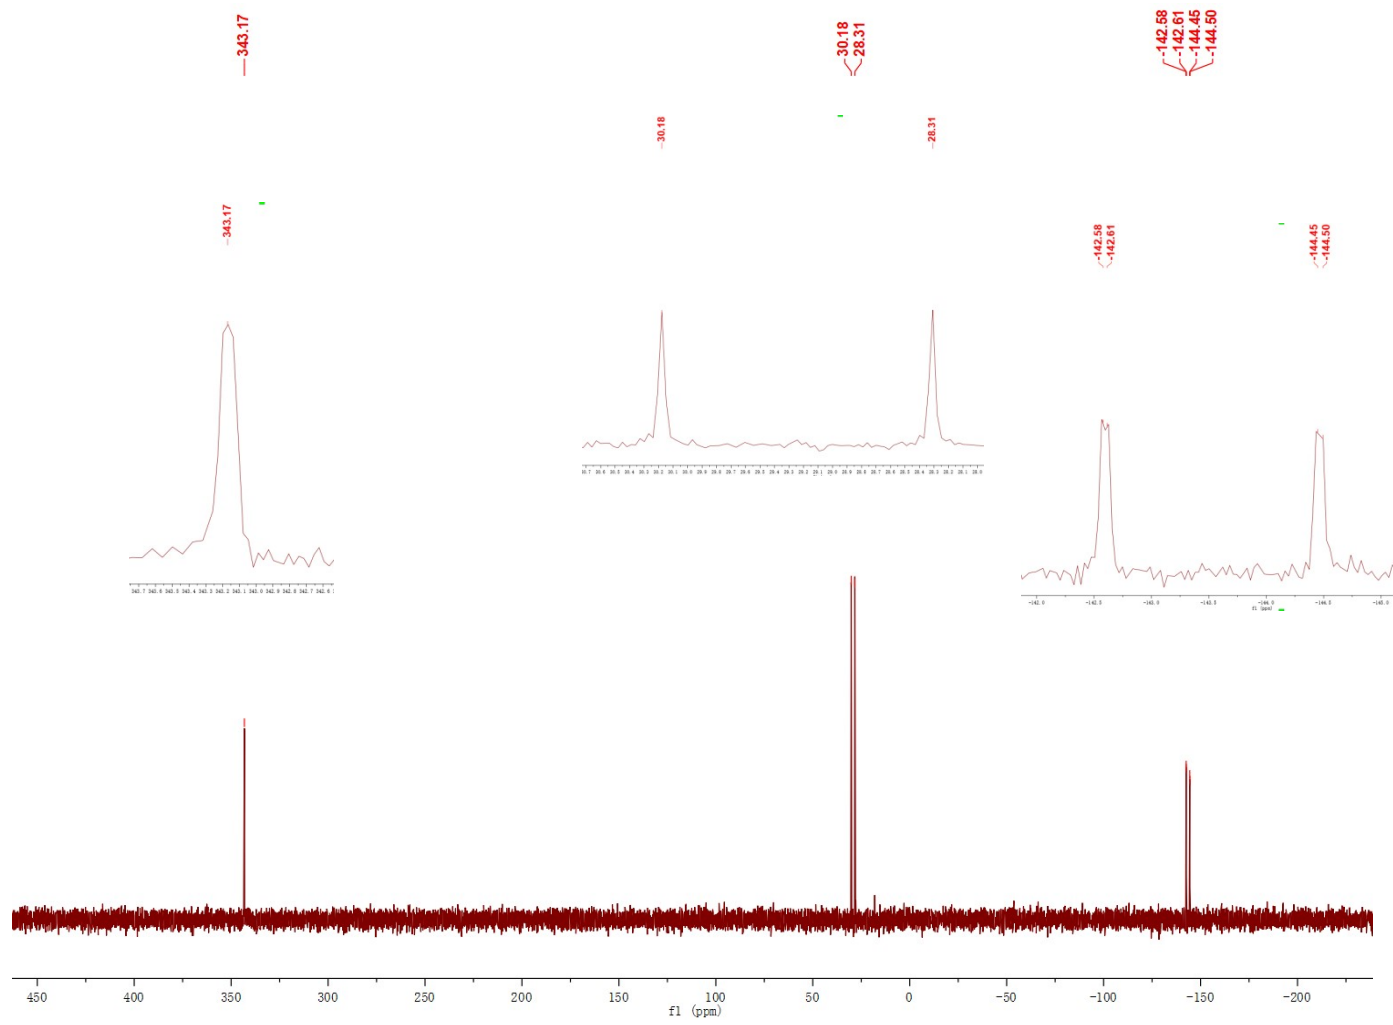

**Fig. S38**  $^{31}\text{P}$  NMR spectrum of **4** in  $\text{C}_6\text{D}_6$



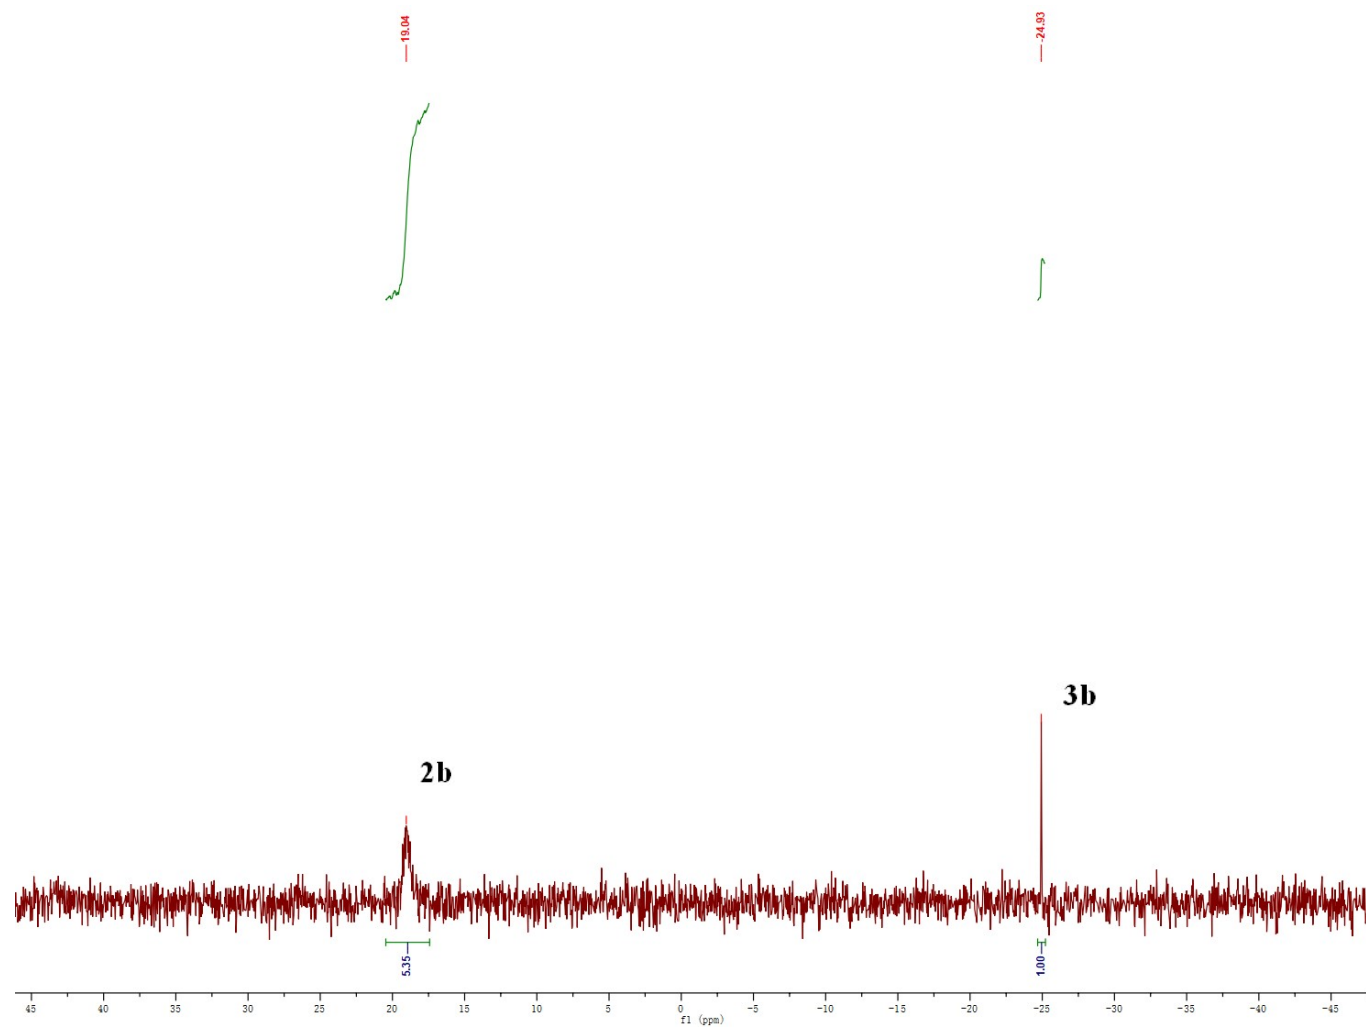

**Fig. S39**  $^{31}\text{P}$  NMR spectrum recorded after a slow conversion of silirene intermediate **2b** to **3b** at r.t. (in  $\text{C}_6\text{D}_6$ )

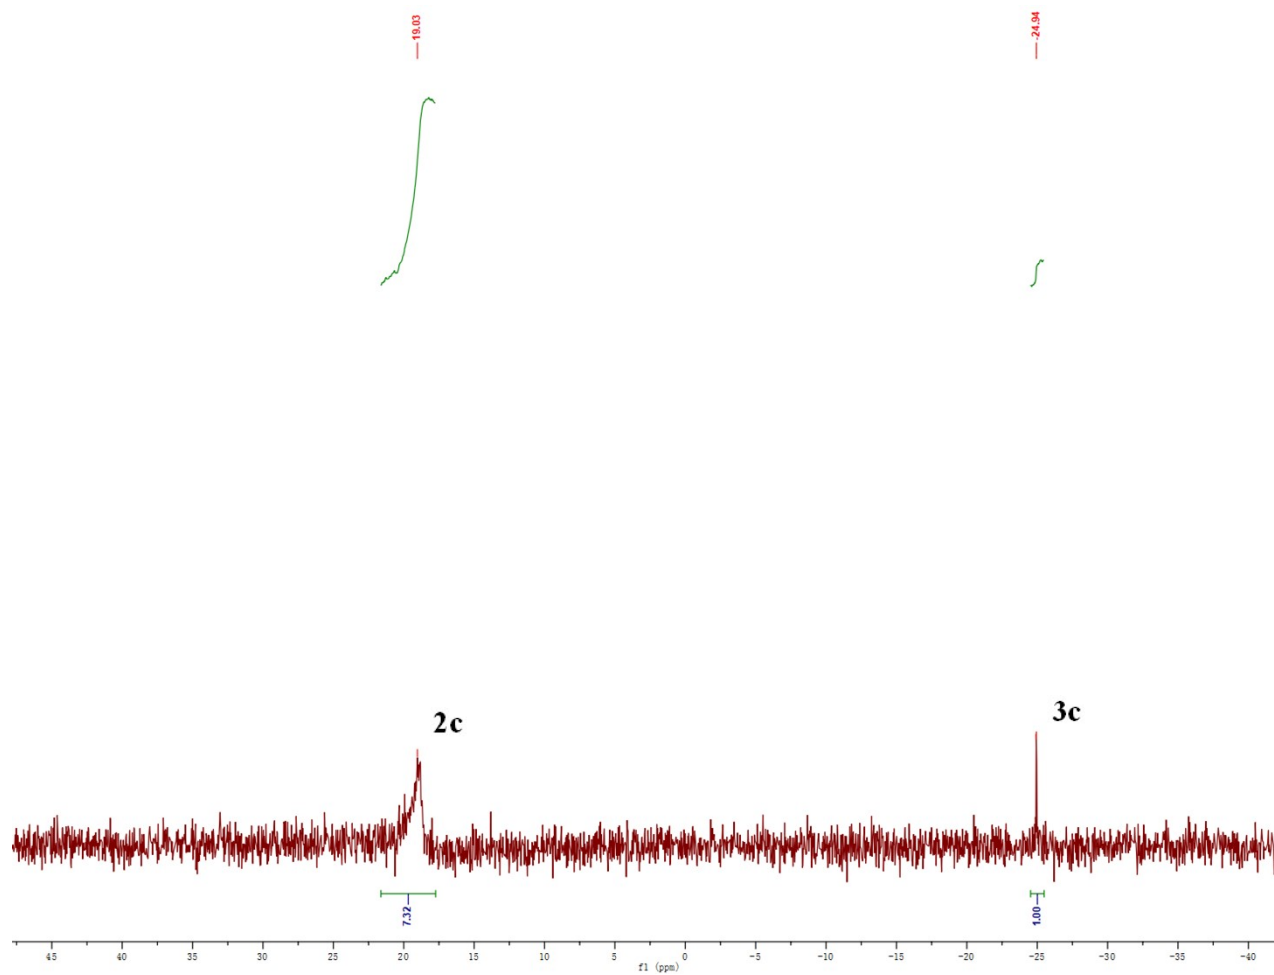

**Fig. S40**  $^{31}\text{P}$  NMR spectrum recorded after a slow conversion of silirene intermediate **2c** to **3c** at r.t. (in  $\text{C}_6\text{D}_6$ )

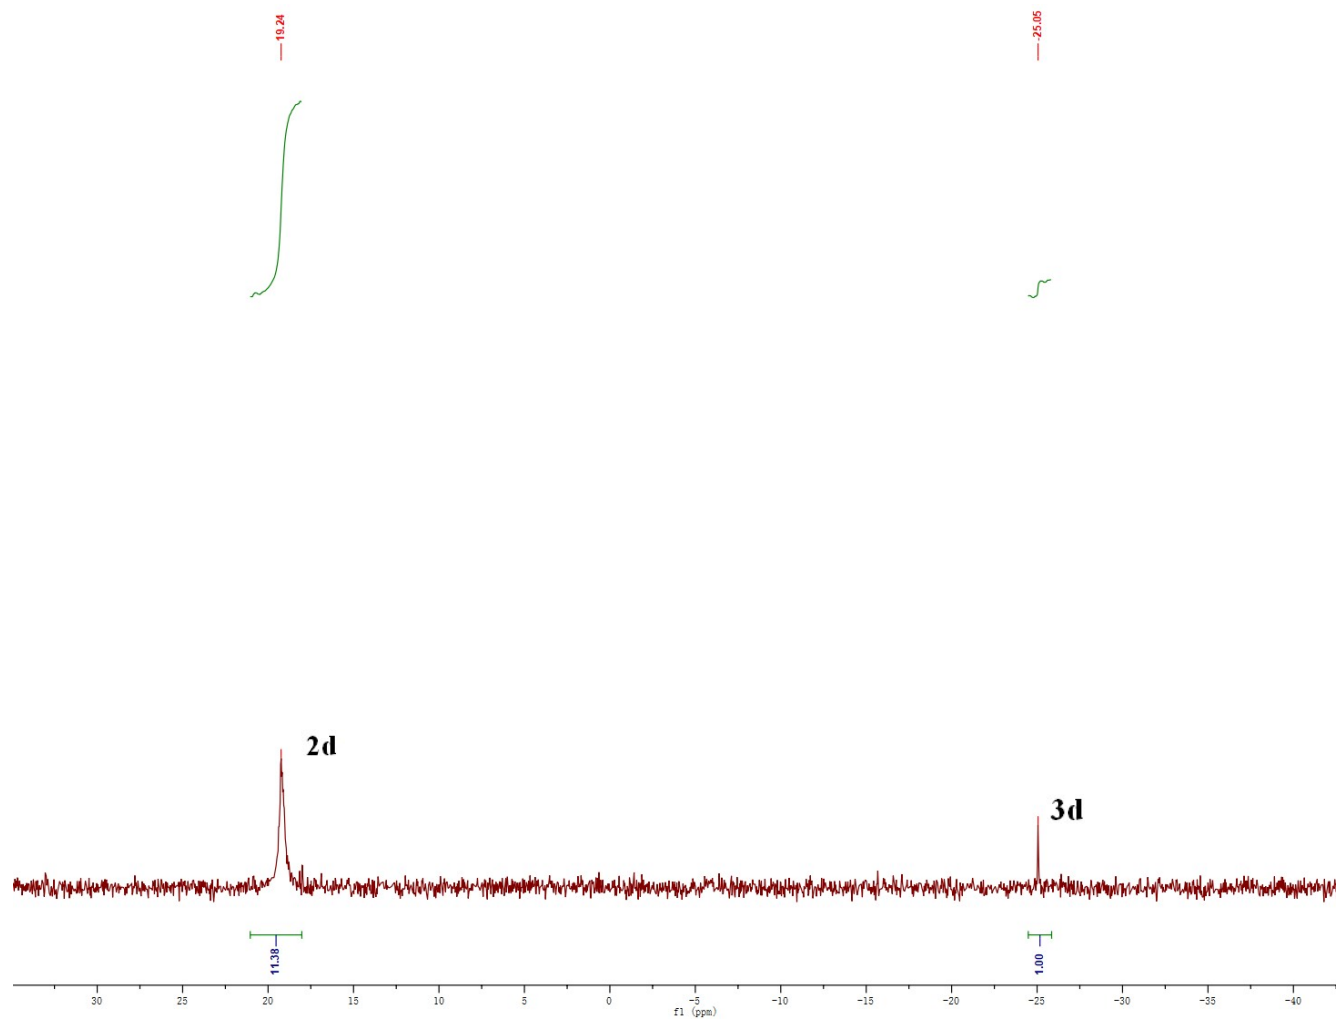

**Fig. S41**  $^{31}\text{P}$  NMR spectrum recorded after a slow conversion of silirene intermediate **2d** to **3d** at r.t. (in  $\text{C}_6\text{D}_6$ )

## VI. References

- [S1] (a) C.-W. So, H. W. Roesky, J. Magull and R. B. Oswald, *Angew. Chem., Int. Ed.*, 2006, **45**, 3948-3950; (b) C.-W. So, H. W. Roesky, P. M. Gurubasavaraj, R. B. Oswald, M. T. Gamer, P. G. Jones and S. Blaurock, *J. Am. Chem. Soc.*, 2007, **129**, 12049-12054.
- [S2] G. M. Sheldrick, *Acta Crystallogr., Sect. A: Found. Crystallogr.*, 1990, **46**, 467-473.
- [S3] G. M. Sheldrick, SHELXL-97, *Program for Crystal Structure Refinement*, University of Göttingen, Göttingen, Germany, 1997.
- [S4] Y. Zhao and D. G. Truhlar, *Acc. Chem. Res.*, 2008, **41**, 157-167.
- [S5] M.-C. Yang and M.-D. Su, *New J. Chem.*, 2020, **44**, 8922-8936.
- [S6] F. Weigend and R. Ahlrichs, *Phys. Chem. Chem. Phys.*, 2005, **7**, 3297-3305.
- [S7] M. J. Frisch, G. W. Trucks, H. B. Schlegel, G. E. Scuseria, M. A. Robb, J. R. Cheeseman, G. Scalmani, V. Barone, G. A. Petersson, H. Nakatsuji, X. Li, M. Caricato, A. V. Marenich, J. Bloino, B. G. Janesko, R. Gomperts, B. Mennucci, H. P. Hratchian, J. V. Ortiz, A. F. Izmaylov, J. L. Sonnenberg, D. Williams-Young, F. Ding, F. Lipparini, F. Egidi, J. Goings, B. Peng, A. Petrone, T. Henderson, D. Ranasinghe, V. G. Zakrzewski, J. Gao, N. Rega, G. Zheng, W. Liang, M. Hada, M. Ehara, K. Toyota, R. Fukuda, J. Hasegawa, M. Ishida, T. Nakajima, Y. Honda, O. Kitao, H. Nakai, T. Vreven, K. Throssell, J. A. Montgomery, Jr., J. E. Peralta, F. Ogliaro, M. J. Bearpark, J. J. Heyd, E. N. Brothers, K. N. Kudin, V. N. Staroverov, T. A. Keith, R. Kobayashi, J. Normand, K. Raghavachari, A. P. Rendell, J. C. Burant, S. S. Iyengar, J. Tomasi, M. Cossi, J. M. Millam, M. Klene, C. Adamo, R. Cammi, J. W. Ochterski, R. L. Martin, K. Morokuma, O. Farkas, J. B. Foresman and D. J. Fox, Gaussian, Inc., Wallingford CT, 2016.
- [S8] M. Cossi, V. Barone, R. Cammi and J. Tomasi, *Chem. Phys. Lett.*, 1996, **255**, 327-335.

[S9] M. T. Cancès, V. Mennucci and J. Tomasi, *J. Chem. Phys.*, 1997, **107**, 3032-3041.

[S10] V. Barone, M. Cossi, B. Mennucci and J. Tomasi, *J. Chem. Phys.*, 1997, **107**, 3210-3221.
